# Supplementary material
Source: publisher figshare collection journal article supplement (https://acs.figshare.com/ndownloader/files/7223837)

# Pyrimidine-Based Inhibitors of Dynamin I GTPase Activity: Inhibition of Dynamin I GTPase's PH Domain

*Luke R. Odell, Mohammed K. Abdel-Hamid, Timothy A. Hill, Ngoc Chau, Kelly A. Young, Fiona M Deane, Jennette A. Sakoff, Sofia Andersson, James A. Daniel, Phillip J. Robinson, and Adam McCluskey*

## Electronic Supporting Information

Molecular Modelling Images

Figure S1

Figure S2

**Table S1.** Inhibition dynI GTPase activity by chloroaminopyrimidines **10a** – **26b**.

**Table S2** – CEREP ExpresS Profile

Experimental Details for aminopyrimidine synthesis

<sup>1</sup>H and <sup>13</sup>C NMR spectra.

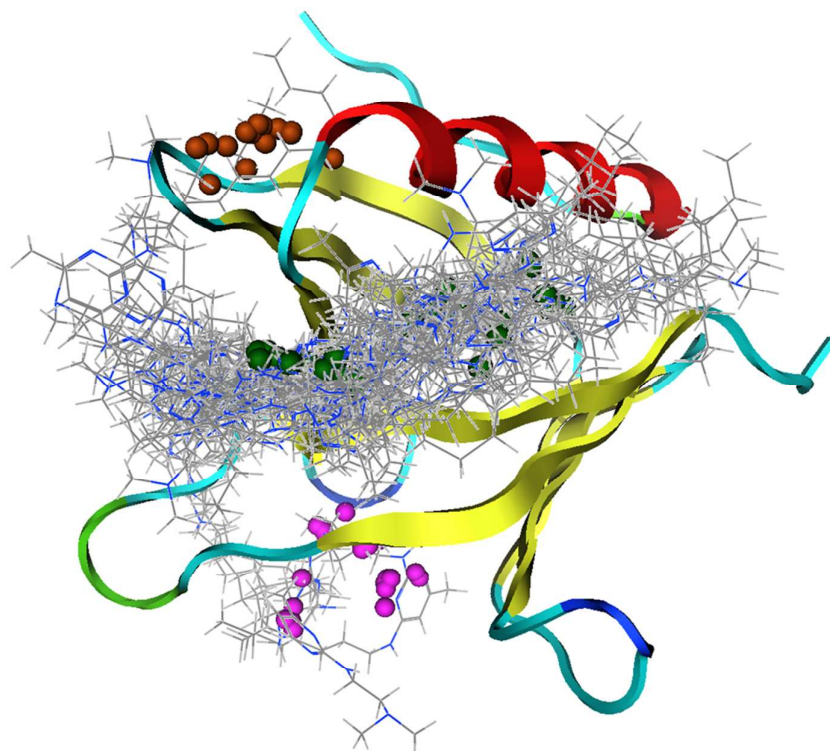

**Figure S1.** Ribbon representation of dynI PH domain showing potential small-molecule binding sites as colour coded spheres; pink (site 1), green (site 2) and brown (site 3). The predicted binding clusters for the docked **1** poses are rendered in line representation. Site 2 shows major clustering of docked poses (~ 96 %) followed by site 1 (3%) and site 3 (0.7%).

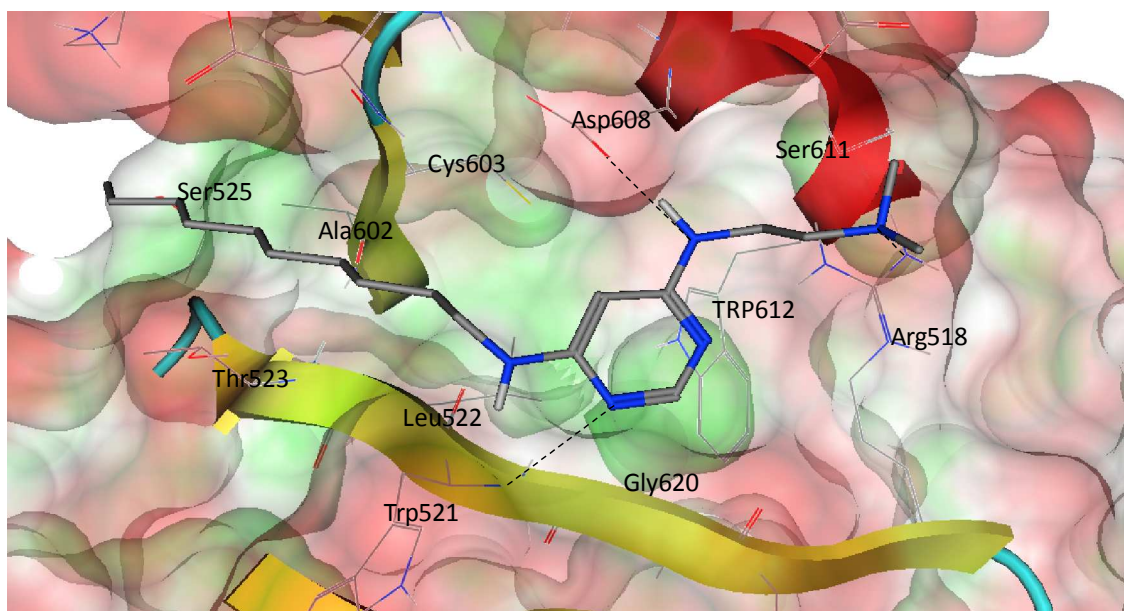

**Figure S2.** A representation of the predicted binding pose of **42** (stick, colour coded by atom type) within the Site-2 binding site of dynI PH domain (selected residues and backbone are shown and labelled). Surface representation; red: exposed, green: cavity. The alkyl side chain of **42** is pointed towards a hydrophobic groove while the aminopyrimidine moiety projects towards the hydrophilic region of the binding site. Potential hydrogen bond interactions are shown as dashed lines.

**Table S1.** Inhibition dynl GTPase activity by chloroaminopyrimidines **10a** – **26b**.

| 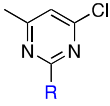 |                                                                                     |                                |  |                                                                                      |                                |
|-----------------------------------------------------------------------------------|-------------------------------------------------------------------------------------|--------------------------------|------------------------------------------------------------------------------------|--------------------------------------------------------------------------------------|--------------------------------|
|                                                                                   | R                                                                                   | Dyn I IC <sub>50</sub><br>(μM) |                                                                                    | R                                                                                    | Dyn I IC <sub>50</sub><br>(μM) |
| <b>10a</b>                                                                        | NHCH <sub>2</sub> CH <sub>3</sub>                                                   | - <sup>a</sup>                 | <b>10b</b>                                                                         | NHCH <sub>2</sub> CH <sub>3</sub>                                                    | -                              |
| <b>11a</b>                                                                        | NHCH <sub>2</sub> CH <sub>2</sub> CH <sub>3</sub>                                   | -                              | <b>11b</b>                                                                         | NHCH <sub>2</sub> CH <sub>2</sub> CH <sub>3</sub>                                    | -                              |
| <b>12a</b>                                                                        | NHCH <sub>2</sub> (CH <sub>2</sub> ) <sub>2</sub> CH <sub>3</sub>                   | -                              | <b>12b</b>                                                                         | NHCH <sub>2</sub> (CH <sub>2</sub> ) <sub>2</sub> CH <sub>3</sub>                    | -                              |
| <b>13a</b>                                                                        | NHCH <sub>2</sub> (CH <sub>2</sub> ) <sub>4</sub> CH <sub>3</sub>                   | -                              | <b>13b</b>                                                                         | NHCH <sub>2</sub> (CH <sub>2</sub> ) <sub>4</sub> CH <sub>3</sub>                    | -                              |
| <b>14a</b>                                                                        | NHCH <sub>2</sub> (CH <sub>2</sub> ) <sub>6</sub> CH <sub>3</sub>                   | -                              | <b>14b</b>                                                                         | NHCH <sub>2</sub> (CH <sub>2</sub> ) <sub>6</sub> CH <sub>3</sub>                    | -                              |
| <b>15a</b>                                                                        | NHCH <sub>2</sub> (CH <sub>2</sub> ) <sub>8</sub> CH <sub>3</sub>                   | -                              | <b>15b</b>                                                                         | NHCH <sub>2</sub> (CH <sub>2</sub> ) <sub>8</sub> CH <sub>3</sub>                    | -                              |
| <b>16a</b>                                                                        | NHCH <sub>2</sub> (CH <sub>2</sub> ) <sub>12</sub> CH <sub>3</sub>                  | >>300                          | <b>16b</b>                                                                         | NHCH <sub>2</sub> (CH <sub>2</sub> ) <sub>12</sub> CH <sub>3</sub>                   | -                              |
| <b>16a</b>                                                                        | NHCH(CH <sub>3</sub> )CH <sub>2</sub> CH <sub>3</sub>                               | -                              | <b>17b</b>                                                                         | NHCH(CH <sub>3</sub> )CH <sub>2</sub> CH <sub>3</sub>                                | -                              |
| <b>18a</b>                                                                        |    | -                              | <b>18b</b>                                                                         |    | -                              |
| <b>19a</b>                                                                        |   | -                              | <b>19b</b>                                                                         |   | -                              |
| <b>20a</b>                                                                        |  | -                              | <b>20b</b>                                                                         |  | -                              |
| <b>21a</b>                                                                        |  | -                              | <b>21b</b>                                                                         |  | -                              |
| <b>22a</b>                                                                        | N(CH <sub>3</sub> ) <sub>2</sub>                                                    | -                              | <b>22b</b>                                                                         | N(CH <sub>3</sub> ) <sub>2</sub>                                                     | -                              |
| <b>23a</b>                                                                        | NHCH <sub>2</sub> CH <sub>2</sub> CH <sub>2</sub> N(CH <sub>3</sub> ) <sub>2</sub>  | 327 ± 14.0                     | <b>23b</b>                                                                         | NHCH <sub>2</sub> CH <sub>2</sub> CH <sub>2</sub> N(CH <sub>3</sub> ) <sub>2</sub>   | 264 ± 40.8                     |
| <b>24a</b>                                                                        | NHCH <sub>2</sub> CH <sub>2</sub> NH <sub>2</sub>                                   | -                              | <b>24b</b>                                                                         | NHCH <sub>2</sub> CH <sub>2</sub> NH <sub>2</sub>                                    | -                              |
| <b>25a</b>                                                                        | NHCH <sub>2</sub> CH <sub>2</sub> NHBoc                                             | -                              | <b>25b</b>                                                                         | NHCH <sub>2</sub> CH <sub>2</sub> NHBoc                                              | -                              |
| <b>26a</b>                                                                        |  | -                              | <b>26b</b>                                                                         |  | -                              |

<sup>a</sup> no activity at 300 μM drug concentration

**Table S2.** CEREP ExpressS Panel Screening of **1** at 10  $\mu$ M drug concentration.

| Assay                                      |                              | % Inhibition of Control Specific Binding | Reference Compound  | IC <sub>50</sub> Ref (nM) | K <sub>i</sub> Ref (nM) |
|--------------------------------------------|------------------------------|------------------------------------------|---------------------|---------------------------|-------------------------|
| Adenosine                                  | A <sub>1</sub> <sup>a</sup>  | 3                                        | DPCPX               | 0.75                      | 0.47                    |
|                                            | A <sub>2A</sub> <sup>a</sup> | -17                                      | NECA                | 19                        | 16                      |
|                                            | A <sub>3</sub> <sup>a</sup>  | -9                                       | IB-MECA             | 0.38                      | 0.23                    |
| Adrenergic                                 | alpha 1 <sup>b</sup>         | 10                                       | prazosin            | 0.23                      | 0.06                    |
|                                            | alpha 2 <sup>b</sup>         | 35                                       | yohimbine           | 0.56                      | 24                      |
|                                            | beta 1 (h) <sup>c</sup>      | 75                                       | atenolol            | 180                       | 130                     |
|                                            | beta 2 (h) <sup>c</sup>      | 19                                       | ICI 118551          | 0.41                      | 0.14                    |
| Angiotensin-II                             | AT1 (h) <sup>a</sup>         | 6                                        | saralasin           | 1.0                       | 0.51                    |
| GABA                                       | BZD (central) <sup>c</sup>   | -26                                      | diazepam            | 11                        | 8.8                     |
| Bradykinin                                 | B2 (h) <sup>c</sup>          | -11                                      | NPC 567             | 11                        | 5.5                     |
| Cannabinoid                                | CB1 (h) <sup>c</sup>         | 31                                       | CP 55940            | 0.28                      | 0.24                    |
| Cholecystokinin                            | CCK1 (CCKA) (h) <sup>c</sup> | 86                                       | CCK-8s              | 0.095                     | 0.071                   |
| Dopamine                                   | D1 (h) <sup>a</sup>          | 80                                       | SCH 23390           | 0.16                      | 0.063                   |
|                                            | D2S (h) <sup>a</sup>         | 99                                       | (+)-butaclamol      | 0.81                      | 0.27                    |
| Endothelin                                 | 14                           | 14                                       | 14                  | 0.040                     | 0.020                   |
| GABA (non-selective) (agonist radioligand) |                              | -4                                       | -4                  | -4                        | 28                      |
|                                            |                              | 31                                       | 31                  | 31                        | 0.57                    |
| GAL2 (h) <sup>c</sup>                      |                              | 48                                       | IL-8                | 0.046                     | 0.022                   |
| CXCR2 (IL-8B) (h) <sup>c</sup>             |                              | -2                                       | MIP-1alpha          | 0.035                     | 0.024                   |
| CCR1 (h) <sup>c</sup>                      |                              | 102                                      | pyrilamine          | 1.9                       | 0.71                    |
| H1 (h) <sup>a</sup>                        |                              | 106                                      | cimetidine          | 500                       | 490                     |
| MC4 (h) <sup>c</sup>                       |                              | 96                                       | NDP-alpha -MSH      | 0.16                      | 0.14                    |
| MT1 (ML1A) (h) <sup>c</sup>                |                              | 42                                       | melatonin           | 0.53                      | 0.43                    |
| M1 (h) <sup>a</sup>                        |                              | 91                                       | pirenzepine         | 27                        | 24                      |
| M2 (h) <sup>a</sup>                        |                              | 83                                       | methoctramine       | 21                        | 15                      |
| M3 (h) <sup>a</sup>                        |                              | 104                                      | 4-DAMP              | 0.31                      | 0.22                    |
| NK2 (h) <sup>c</sup>                       |                              | 93                                       | [Nleu10]-NKA (4-10) | 3.6                       | 2.0                     |
| NK3 (h) <sup>a</sup>                       |                              | 2                                        | SB 222200           | 9.3                       | 5.0                     |
| Y1 (h) <sup>c</sup>                        |                              | 50                                       | NPY                 | 0.076                     | 0.054                   |
| Y2 (h) <sup>c</sup>                        |                              | 40                                       | NPY                 | 0.071                     | 0.029                   |
| NTS1 (NT1) (h) <sup>c</sup>                |                              | 62                                       | neurotensin         | 0.20                      | 0.17                    |
| delta 2 (DOP) (h) <sup>c</sup>             |                              | 46                                       | DPDPE               | 1.2                       | 0.69                    |
| kappa (KOP) <sup>c</sup>                   |                              | 97                                       | U 50488             | 0.68                      | 0.45                    |
| mu (MOP) (h) <sup>c</sup>                  |                              | 50                                       | DAMGO               | 0.90                      | 0.37                    |
| NOP (ORL1) (h) <sup>c</sup>                |                              | 31                                       | nociceptin          | 0.42                      | 0.14                    |
| EP4 (h) <sup>c</sup>                       |                              | 33                                       | PGE2                | 0.30                      | 0.11                    |

|                                                                     |     |                         |       |       |
|---------------------------------------------------------------------|-----|-------------------------|-------|-------|
| 5-HT1A (h) <sup>c</sup>                                             | 87  | 8-OH-DPAT               | 0.47  | 0.29  |
| 5-HT1B <sup>a</sup>                                                 | 87  | serotonin               | 45    | 27    |
| 5-HT2A (h) <sup>c</sup>                                             | 93  | ketanserin              | 0.52  | 0.28  |
| 5-HT2B (h) <sup>c</sup>                                             | 94  | (±)DOI                  | 3.2   | 1.6   |
| 5-HT3 (h) <sup>a</sup>                                              | 38  | MDL 72222               | 5.8   | 4.1   |
| 5-HT5a (h) <sup>c</sup>                                             | 99  | serotonin               | 260   | 130   |
| 5-HT6 (h) <sup>c</sup>                                              | 91  | serotonin               | 130   | 61    |
| 5-HT7 (h) <sup>c</sup>                                              | 98  | serotonin               | 0.47  | 0.17  |
| sst (non-selective) (agonist radioligand)                           | 34  | somatostatin-14         | 0.19  | 0.12  |
| VPAC1 (VIP1) <sup>c</sup>                                           | -6  | VIP                     | 0.096 | 0.053 |
| V1a (h) <sup>c</sup>                                                | 18  | [d(CH2)51,Tyr(Me)2]-AVP | 1.3   | 0.79  |
| Ca2+ channel (L, verapamil site)<br>(phenylalkylamine) <sup>a</sup> | 57  | D 600                   | 21    | 11    |
| KV channel <sup>a</sup>                                             | 7   | alpha -dendrotoxin      | 0.65  | 0.52  |
| SKCa channel <sup>a</sup>                                           | 1   | apamin                  | 0.021 | 0.011 |
| Na+ channel (site 2) <sup>a</sup>                                   | 84  | veratridine             | 7200  | 6500  |
| Cl- channel (GABA-gated) <sup>a</sup>                               | 0   | picrotoxinin            | 360   | 300   |
| norepinephrine transporter (h) <sup>a</sup>                         | 96  | protriptyline           | 2.9   | 2.1   |
| dopamine transporter (h) <sup>a</sup>                               | 105 | BTCP                    | 12    | 6.2   |
| 5-HT transporter (h) <sup>a</sup>                                   | 86  | imipramine              | 1.6   | 0.72  |

<sup>a</sup> antagonist radio-ligand; <sup>b</sup> non-selective, antagonist radio-ligand

## Chemistry

### (4-Chloro-6-methylpyrimidin-2-yl)ethylamine (10a) and (2-Chloro-6-methylpyrimidin-4-yl)ethylamine (10b) <sup>S1</sup>

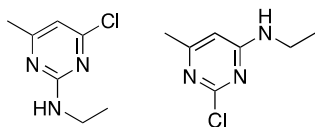

Synthesized using the general procedure as for **4a,b** from 2,4-dichloro-6-methylpyrimidine and propylamine. The obtained residue was purified by flash chromatography using 1:9 ethyl acetate:hexanes to yield the corresponding isomers.

**(10a)** Yield 254 mg, 35%, mp 90-91°C; <sup>1</sup>H NMR (CDCl<sub>3</sub>): δ 1.72 (t, 3H, *J* = 7.2 Hz), 2.25 (s, 3H), 3.42 (q, 2H, *J* = 7.1 Hz), 5.46 (br s, 1H), 6.37 (s, 1H); <sup>13</sup>C NMR (CDCl<sub>3</sub>): δ 14.2, 23.1, 35.6, 108.2, 160.5, 161.7, 168.8.

**(10b)** Yield 397 mg, 54%, mp 73-74°C; <sup>1</sup>H NMR (CDCl<sub>3</sub>): δ 1.10 (t, 3H, *J* = 7.1 Hz), 2.18 (s, 3H), 3.24 (p, 2H, *J* = 7.0 Hz), 5.85 (br s, 1H), 5.99 (s, 1H); <sup>13</sup>C NMR (CDCl<sub>3</sub>): δ 13.6, 22.9, 35.6, 99.5 (br), 159.4, 163.5, 165.2 (br).

### (4-Chloro-6-methylpyrimidin-2-yl)propylamine (11a) and (2-Chloro-6-methylpyrimidin-4-yl)propylamine (11b) <sup>S2</sup>

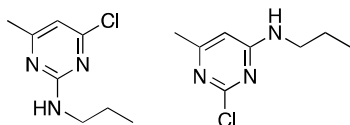

Synthesized using the general procedure as for **4a,b** from 2,4-dichloro-6-methylpyrimidine and propylamine. Purified by flash chromatography EtOAc:Triethylamine (95:5).

**(11a)** Yield 136 mg, 25% pale yellow oil; <sup>1</sup>H NMR (CDCl<sub>3</sub>): δ 0.96 (t, 3H, *J* = 7.4 Hz), 1.62 (m, 2H), 2.28 (s, 3H), 3.37 (q, 2H, *J* = 7.0 Hz), 5.19 (br s, 1H), 6.41 (s, 1H); <sup>13</sup>C NMR (CDCl<sub>3</sub>): δ 10.7, 22.2, 23.2, 42.7, 108.4, 160.5, 161.8, 168.9.

**(11b)** Yield 176 mg, 31% pale yellow oil; <sup>1</sup>H NMR (CDCl<sub>3</sub>): δ 0.82 (t, 3H, *J* = 7.4 Hz), 1.48 (m, 2H), 2.31 (s, 3H), 3.08 (q, 2H, *J* = 7.1 Hz), 5.72 (br s, 1H), 6.10 (s, 1H); <sup>13</sup>C NMR (CDCl<sub>3</sub>): δ 11.8, 22.8, 26.1, 43.7, 97.9 (br), 159.9, 164.0, 168.4.

### (4-Chloro-6-methylpyrimidin-2-yl)butylamine (12a) and (2-Chloro-6-methylpyrimidin-4-yl)butylamine (12b) <sup>S3</sup>

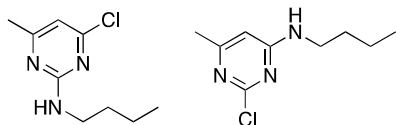

Synthesized using the general procedure as for **4a,b** from 2,4-dichloro-6-methylpyrimidine and butylamine. Purified by flash chromatography EtOAc:Triethylamine (95:5).

**(12a)** Yield 326 mg, 38%, mp 42-43°C; <sup>1</sup>H NMR (CDCl<sub>3</sub>): δ 0.88 (t, 3H, *J* = 7.0 Hz), 1.35 (m, 2H), 1.52 (m, 2H), 2.24 (s, 3H), 3.38 (q, 2H, *J* = 7.1 Hz), 5.47 (br s, 1H), 6.35 (s, 1H); <sup>13</sup>C NMR (CDCl<sub>3</sub>): δ 13.0, 19.4, 23.1, 31.1, 40.5, 108.2, 160.5, 161.8, 168.8.

**(12b)** Yield 507 mg, 59%, mp 56-57°C; <sup>1</sup>H NMR (CDCl<sub>3</sub>): δ 0.80 (t, 3H, *J* = 7.0 Hz), 1.25 (m, 2H), 1.45 (m, 2H), 2.17 (s, 3H), 3.17 (q, 2H, *J* = 7.1 Hz), 5.81 (br s, 1H), 5.98 (s, 1H); <sup>13</sup>C NMR (CDCl<sub>3</sub>): δ 12.9, 19.2, 22.9, 30.5, 40.6, 98.9 (br), 159.4, 163.7, 166.6 (br).

### (4-Chloro-6-methylpyrimidin-2-yl)hexylamine (13a) and (2-Chloro-6-methylpyrimidin-4-yl)hexylamine (13b) <sup>S2</sup>

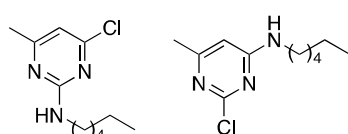

Synthesized using the general procedure as for **4a,b** from 2,4-dichloro-6-methylpyrimidine and hexylamine. Purified by flash chromatography EtOAc:Triethylamine (95:5).

**(13a)** Yield 230 mg, 23%, mp 36-37°C; <sup>1</sup>H NMR (CDCl<sub>3</sub>): δ 0.85 (t, 3H, *J* = 7.2 Hz), 1.23 (m, 6H), 1.55 (p, 2H, *J* = 7.3 Hz), 2.25 (s, 3H), 3.37 (q, 2H, *J* = 7 Hz), 5.42 (br s, 1H), 6.37 (s, 1H); <sup>13</sup>C NMR (CDCl<sub>3</sub>): δ 13.3, 21.9, 23.1, 25.8, 28.9, 30.9, 40.8, 108.1, 160.5, 161.8, 168.8.

**(13b)** Yield 246 mg, 25% pale yellow oil. <sup>1</sup>H NMR (CDCl<sub>3</sub>): δ 0.73 (t, 3H, *J* = 6.7 Hz), 1.18 (m, 6H), 1.45 (m, 2H), 2.14 (s, 3H), 3.17 (q, 2H, *J* = 6.5 Hz), 5.91 (br s, 1H), 5.97 (s, 1H); <sup>13</sup>C NMR (CDCl<sub>3</sub>): δ 13.3, 21.9, 22.8, 25.7, 28.4, 30.7, 40.9 (br), 99.4 (br), 159.4, 163.7, 166.5 (br).

### (4-Chloro-6-methylpyrimidin-2-yl)octylamine (14a) and (2-Chloro-6-methylpyrimidin-4-yl)octylamine (14b) <sup>S4</sup>

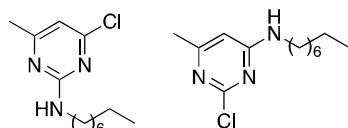

Synthesized using the general procedure as for **4a,b** from 2,4-dichloro-6-methylpyrimidine and octylamine. Purified by flash chromatography EtOAc:Triethylamine (95:5).

**(14a)** Yield 266 mg, 22% mp 37-38°C; <sup>1</sup>H NMR (CDCl<sub>3</sub>): δ 0.85 (t, 3H, *J* = 7.3 Hz), 1.48 (m, 10H), 1.55 (m, 2H), 2.23 (s, 3H), 3.37 (q, 2H, *J* = 7.0 Hz), 5.38 (br s, 1H), 6.37 (s, 1H); <sup>13</sup>C NMR (CDCl<sub>3</sub>): δ 13.3, 21.9, 26.2, 28.6, 28.8, 28.9, 29.0, 31.2, 40.8, 108.1, 160.5, 161.8, 168.8.

**(14b)** Yield 176 mg, 31%, mp 36-38°C; <sup>1</sup>H NMR (CDCl<sub>3</sub>): δ 0.77 (t, 3H, *J* = 7.0 Hz), 1.15 (m, 10H), 1.48 (m, 2H), 2.19 (s, 3H), 3.17 (q, 2H, *J* = 6.5 Hz), 5.81 (br s, 1H), 5.99 (s, 1H); <sup>13</sup>C NMR (CDCl<sub>3</sub>): δ 13.3, 21.9, 22.9, 26.1, 28.4, 28.7, 28.9, 31.0, 40.9, 99.4 (br), 159.5, 163.7, 166.7 (br).

**(4-Chloro-6-methylpyrimidin-2-yl)decylamine (15a) and (2-Chloro-6-methylpyrimidin-4-yl)decylamine (15b)**

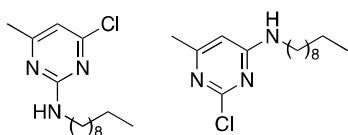

Synthesized using the general procedure as for **4a,b** from 2,4-dichloro-6-methylpyrimidine and decylamine. Purified by flash chromatography EtOAc:Triethylamine (95:5).

**(15a)** Yield 266 mg, 32%, mp 46-48°C; <sup>1</sup>H NMR (CDCl<sub>3</sub>): δ 0.85 (t, 3H, *J* = 7.3 Hz), 1.48 (m, 14H), 1.53 (m, 2H), 2.21 (s, 3H), 3.37 (q, 2H, *J* = 6.8 Hz), 5.42 (br s, 1H), 6.37 (s, 1H); <sup>13</sup>C NMR (CDCl<sub>3</sub>): δ 13.3, 22.0, 28.6, 28.7, 28.8 (2 x C), 28.9 (2 x C), 31.2, 40.8, 108.3, 160.5, 161.8, 168.8; HRMS calculated for C<sub>15</sub>H<sub>26</sub>ClN<sub>3</sub>, 283.1815; found 283.1820.

**(15b)** Yield 231 mg, 28%, mp 29-31°C; <sup>1</sup>H NMR (CDCl<sub>3</sub>): δ 0.77 (t, 3H, *J* = 6.8 Hz), 1.28 (m, 14H), 1.44 (m, 2H), 2.19 (s, 3H), 3.17 (q, 2H, *J* = 6.6 Hz), 5.75 (br s, 1H), 6.08 (s, 1H); <sup>13</sup>C NMR (CDCl<sub>3</sub>): δ 13.3, 21.9, 22.9, 28.6, 28.7, 28.8 (2 x C), 28.9 (2 x C), 31.0, 40.9, 98.8 (br), 161.1, 163.7, 165.8 (br); HRMS calculated for C<sub>15</sub>H<sub>26</sub>ClN<sub>3</sub>, 283.1815; found 283.1818.

**(4-Chloro-6-methylpyrimidin-2-yl)tetradecylamine (16a) and (2-Chloro-6-methylpyrimidin-4-yl)tetradecylamine (16b)**

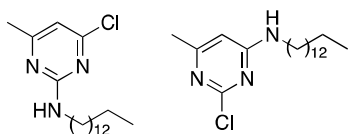

Synthesized using the general procedure as for **4a,b** from 2,4-dichloro-6-methylpyrimidine and tetradecylamine. Purified by flash chromatography EtOAc:Triethylamine (95:5).

**(16a)** Yield 801 mg, 48%, mp 61-63°C; <sup>1</sup>H NMR (CDCl<sub>3</sub>): δ 0.87 (t, 3H, *J* = 6.4 Hz), 1.42 (s, 22H), 1.56 (m, 2H), 2.26 (s, 3H), 3.38 (q, 2H, *J* = 6.9 Hz), 5.33 (br s, 1H), 6.38 (s, 1H); <sup>13</sup>C NMR (CDCl<sub>3</sub>): δ 13.3, 22.1, 23.4, 26.3, 28.7, 28.9 (3 x C), 29.0 (3 x C), 29.1 (2 x C's), 31.3, 40.9, 108.2, 160.5, 161.8, 168.7; HRMS calculated for C<sub>19</sub>H<sub>34</sub><sup>35</sup>ClN<sub>3</sub>, 339.2441; found 339.2439.

**(16b)** Yield 724 mg, 44%, mp 102-104°C; <sup>1</sup>H NMR (CDCl<sub>3</sub>): δ 0.85 (t, 3H, *J* = 6.4 Hz), 1.22 (s, 22H), 1.62 (m, 2H), 2.43 (s, 3H), 3.42 (q, 2H, *J* = 6.9 Hz), 6.76 (br s, 1H), 7.59 (br s, 1H); <sup>13</sup>C NMR (CDCl<sub>3</sub>): δ 13.3, 19.4 (br), 21.8, 26.2, 28.1, 28.5, 28.6, 28.8 (2 x C), 28.9 (3 x C), 31.3, 41.3, 102.5 (br), 153.0 (br), 155.6 (br), 162.4; HRMS calculated for C<sub>19</sub>H<sub>34</sub><sup>35</sup>ClN<sub>3</sub>, 339.2441; found 339.2444.

**sec-Butyl-(4-chloro-6-methylpyrimidin-2-yl)amine (17a) and sec-Butyl-(2-chloro-6-methylpyrimidin-4-yl)amine (17b)**

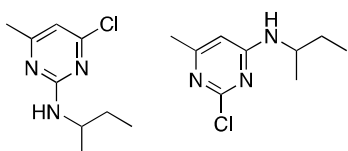

Synthesized using the general procedure as for **4a,b** from 2,4-dichloro-6-methylpyrimidine and sec-butylamine. Purified by flash chromatography EtOAc:Triethylamine (95:5).

**(17a)** Yield 338 mg, 39% pale yellow oil. <sup>1</sup>H NMR (CDCl<sub>3</sub>): δ 0.88 (t, 3H, *J* = 7.4 Hz), 1.13 (d, 3H, *J* = 6.5 Hz), 1.52 (m, 2H), 2.23 (s, 3H), 3.98 (m, 1H), 5.07 (br s, 1H), 6.35 (s, 1H); <sup>13</sup>C NMR (CDCl<sub>3</sub>): δ 9.5, 19.5, 23.1, 29.0, 47.6, 108.2, 160.5, 161.3, 168.8; Analysed for: C, 54.14; H, 7.07; Cl, 17.75; N, 21.04, found C, 54.23; H, 7.15; Cl, 17.44; N, 20.74.

**(17b)** Yield 508 mg, 58%, mp 91-93°C; <sup>1</sup>H NMR (CDCl<sub>3</sub>): δ 0.74 (t, 3H, *J* = 7.4 Hz), 1.01 (d, 3H, *J* = 6.5 Hz), 1.39 (m, 2H), 2.10 (s, 3H), 3.61 (br s, 1H), 5.28 (br s, 1H), 5.94 (s, 1H); <sup>13</sup>C NMR (CDCl<sub>3</sub>): δ 9.4, 19.2, 22.9, 28.7, 47.7 (br), 99.9 (br), 159.5, 163.1, 166.4 (br); Analysed for: C, 54.14; H, 7.07; Cl, 17.75; N, 21.04, found C, 54.19; H, 7.25; Cl, 17.49; N, 20.86.

**(4-Chloro-6-methylpyrimidin-2-yl)cyclohexylamine (18a) and (2-Chloro-6-methylpyrimidin-4-yl)cyclohexylamine (18b)**<sup>S2</sup>

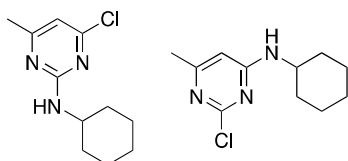

Synthesized using the general procedure as for **4a,b** from 2,4-dichloro-6-methylpyrimidine and cyclohexylamine. Purified by flash chromatography EtOAc:Triethylamine (95:5).

**(18a)** Yield 326 mg, 42% pale yellow oil. <sup>1</sup>H NMR (CDCl<sub>3</sub>): δ 1.18 (m, 3H), 1.37 (m, 2H), 1.57 (m, 1H), 1.67 (m, 2H), 1.96 (m, 2H), 2.25 (s, 3H), 3.81 (m, 1H), 5.09 (br s, 1H), 6.36 (s, 1H); <sup>13</sup>C NMR (CDCl<sub>3</sub>): δ 23.9, 24.7, 25.7, 33.0, 49.4, 108.6, 161.1, 161.3, 169.2; HRMS calculated for C<sub>11</sub>H<sub>16</sub>ClN<sub>3</sub>, 225.1033; found 225.1021.

**(18b)** yield 386 mg, 49% pale yellow oil.  $^1\text{H}$  NMR ( $\text{CDCl}_3$ ):  $\delta$  1.36 (m, 3H), 1.37 (m, 2H), 1.62 (m, 1H), 1.72 (m, 2H), 1.96 (m, 2H), 2.31 (s, 3H), 3.51 (m, 1H), 5.32 (d, 1H), 6.08 (s, 1H);  $^{13}\text{C}$  NMR ( $\text{CDCl}_3$ ):  $\delta$  23.7, 24.5, 25.4, 32.7, 60.3, 100.1 (br), 160.1, 162.9, 166.4; HRMS calculated for  $\text{C}_{11}\text{H}_{16}\text{ClN}_3$ , 225.1033; found 225.1030.

***N*-benzyl-4-chloro-6-methylpyrimidin-2-amine (19a) and *N*-benzyl-2-chloro-6-methylpyrimidin-4-amine (19b)**<sup>S2</sup>

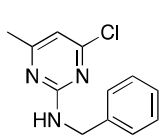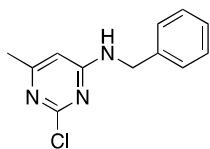

Synthesized using the general procedure as for **4a,b** from 2,4-dichloro-6-methylpyrimidine and benzylamine. Purified by flash chromatography EtOAc:Triethylamine (95:5).

**(19a)** Yield 142 mg, 19%, mp 136-138°C;  $^1\text{H}$  NMR ( $\text{CDCl}_3$ ):  $\delta$  2.29 (s, 3H), 4.64 (d, 2H), 5.48 (br s, 1H), 6.48 (s, 1H), 7.31 (m, 5H);  $^{13}\text{C}$  NMR ( $\text{CDCl}_3$ ):  $\delta$  23.2, 44.9, 109.0, 126.7, 126.9, 128.0, 139.2, 160.7, 161.6, 169.0.

**(19b)** Yield 340 mg, 49%, mp 78-81°C;  $^1\text{H}$  NMR ( $\text{CDCl}_3$ ):  $\delta$  2.25 (s, 3H), 4.51 (d, 2H), 6.06 (s, 1H), 6.15 (br s, 1H), 7.29 (m, 5H);  $^{13}\text{C}$  NMR ( $\text{CDCl}_3$ ):  $\delta$  23.1, 44.9, 99.9 (br), 126.7, 127.1, 128.3, 136.8, 159.6, 163.8, 171.1 (br).

**4-Chloro-*N*-(4-methoxybenzyl)-6-methylpyrimidin-2-amine (20a) and 2-Chloro-*N*-(4-methoxybenzyl)-6-methylpyrimidin-4-amine (20b)**

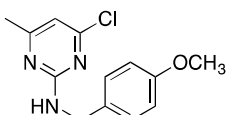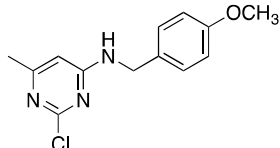

Synthesized using the general procedure as for **4a,b** from 2,4-dichloro-6-methylpyrimidine and 4-methoxybenzylamine. Purified by flash chromatography EtOAc:Triethylamine (95:5).

**(19a)** Yield 142 mg, 23%, mp 145-147°C;  $^1\text{H}$  NMR ( $\text{CDCl}_3$ ):  $\delta$  2.27 (s, 3H), 3.72 (s, 3H), 4.54 (d, 2H), 6.28 (br s, 1H), 6.58 (s, 1H), 6.91 (d, 2H), 7.11 (d, 2H);  $^{13}\text{C}$  NMR ( $\text{CDCl}_3$ ):  $\delta$  22.8, 45.3, 55.7, 101.7, 118.9, 128.4, 130.2, 154.1, 160.7, 162.3, 170.4; HRMS calculated for  $\text{C}_{13}\text{H}_{14}\text{ClN}_3\text{O}$ , 263.0825; found 263.0833.

**(19b)** Yield 340 mg, 48%, mp 101-103°C;  $^1\text{H}$  NMR ( $\text{CDCl}_3$ ):  $\delta$  2.25 (s, 3H), 3.71 (s, 3H), 4.31 (d, 2H), 6.36 (s, 1H), 6.15 (br s, 1H), 6.90 (d, 2H), 7.13 (d, 2H);  $^{13}\text{C}$  NMR ( $\text{CDCl}_3$ ):  $\delta$  23.2, 44.9, 56.1, 100.9 (br), 119.1, 127.7, 128.1, 158.3, 160.8, 161.6, 171.1 (br); HRMS calculated for  $\text{C}_{13}\text{H}_{14}\text{ClN}_3\text{O}$ , 263.0825; found 263.0836.

**(4-Chloro-6-methylpyrimidin-2-yl)(1-cyclopropylmethylpropyl)amine (21a) and (2-Chloro-6-methylpyrimidin-4-yl)cyclopropylmethylpropylamine (21b)**<sup>S5</sup>

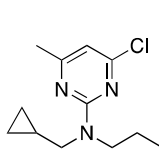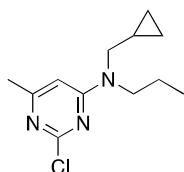

Synthesized using the general procedure as for **4a,b** from 2,4-dichloro-6-methylpyrimidine and cyclopropylmethylpropylamine. Purified by flash chromatography EtOAc:Triethylamine (95:5).

**(21a)** Yield 387 mg, 30% pale yellow oil.  $^1\text{H}$  NMR ( $\text{CDCl}_3$ ):  $\delta$  0.28 (q, 2H,  $J$  = 5.0 Hz), 0.46 (q, 2H,  $J$  = 6.5 Hz), 0.90 (t, 3H,  $J$  = 7.4 Hz), 1.06 (m, 1H), 1.62 (m, 2H), 2.25 (s, 3H), 3.48 (d, 2H,  $J$  = 6.7 Hz), 3.58 (t, 2H,  $J$  = 7.5 Hz), 6.30 (s, 1H);  $^{13}\text{C}$  NMR ( $\text{CDCl}_3$ ):  $\delta$  3.5, 9.9, 11.4, 20.8, 24.0, 49.3, 51.8, 107.3, 160.7, 161.7, 168.7.

**(21b)** Yield 690 mg, 53% pale yellow oil.  $^1\text{H}$  NMR ( $\text{CDCl}_3$ ):  $\delta$  0.21 (q, 2H,  $J$  = 5.0 Hz), 0.46 (q, 2H,  $J$  = 6.5 Hz), 0.87 (t, 3H,  $J$  = 7.4 Hz), 0.97 (m, 1H), 1.56 (m, 2H), 2.29 (s, 3H), 3.34 (d, 2H,  $J$  = 6.7 Hz), 3.40 (t, 2H,  $J$  = 7.5 Hz), 6.10 (s, 1H);  $^{13}\text{C}$  NMR ( $\text{CDCl}_3$ ):  $\delta$  3.6, 9.4, 11.2, 20.3, 23.8, 49.9, 52.8, 99.4, 160.0, 162.8, 166.7.

**(4-Chloro-6-methylpyrimidin-2-yl)-dimethylamine (22a) and (2-Chloro-6-methylpyrimidin-4-yl)-dimethylamine (22b)**<sup>S6</sup>

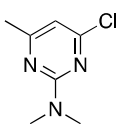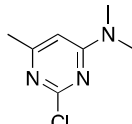

Synthesized using the general procedure as for **4a,b** from 2,4-dichloro-6-methylpyrimidine and *N,N*-dimethylamine. Purified by flash chromatography EtOAc:Triethylamine (95:5).

**(22a)** yield 187 mg, 29% pale yellow oil.  $^1\text{H}$  NMR ( $\text{CDCl}_3$ ):  $\delta$  2.25 (s, 3H), 3.17 (s, 6H), 6.34 (s, 1H);  $^{13}\text{C}$  NMR ( $\text{CDCl}_3$ ):  $\delta$  23.3, 36.3, 106.8, 160.2, 161.6, 168.3.

**(22b)** yield 378 mg, 59% pale yellow oil.  $^1\text{H}$  NMR ( $\text{CDCl}_3$ ):  $\delta$  2.25 (s, 3H), 3.02 (s, 6H), 6.09 (s, 1H);  $^{13}\text{C}$  NMR ( $\text{CDCl}_3$ ):  $\delta$  23.2, 36.6, 98.7, 159.4, 163.2, 166.4.

***N*<sup>1</sup>-(4-Chloro-6-methylpyrimidin-2-yl)-*N*<sup>3</sup>,*N*<sup>3</sup>-dimethylpropane-1,3-diamine (23a) and 2-Chloro-4-(2-dimethylaminopropylamine)-6-methylpyrimidine (23b)**<sup>S7</sup>



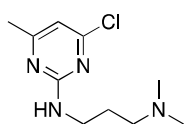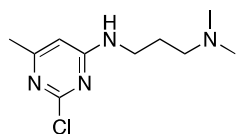

Synthesized using the general procedure as for **4a,b** from 2,4-dichloro-6-methylpyrimidine and *N',N'*-dimethylpropane-1,3-diamine. Purified by flash chromatography EtOAc:Triethylamine (95:5).

**(23a)** yield 141 mg, 17% pale yellow oil. <sup>1</sup>H NMR (CDCl<sub>3</sub>): δ 1.74 (m, 2H), 2.25 (s, 6H), 2.35 (s, 3H), 2.37 (t, 2H, *J* = 6.2 Hz), 3.40 (q, 2H, *J* = 5.9 Hz), 5.84 (br s, 1H), 6.37 (s, 1H); <sup>13</sup>C NMR (CDCl<sub>3</sub>): δ 26.1, 29.8, 39.9, 44.8, 57.2, 108.2, 160.5, 161.8, 168.8.

**(23b)** yield 253 mg, 30% pale yellow oil. <sup>1</sup>H NMR (CDCl<sub>3</sub>): δ 1.57 (m, 2H), 1.92 (s, 3H), 2.12 (s, 6H), 2.36 (m, 2H), 3.12 (br m, 2H), 5.84 (br s, 1H), 5.95 (s, 1H); <sup>13</sup>C NMR (CDCl<sub>3</sub>): δ 22.9, 24.4, 38.6 (br), 43.6, 56.1, 101.2 (br), 159.1, 163.4, 165.8 (br).

***N'*-(4-Chloro-6-methylpyrimidin-2-yl)-ethane-1,2-diamine (24a) and *N'*-(2-chloro-6-methylpyrimidin-4-yl)ethane-1,2-diamine (24b)**

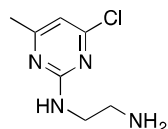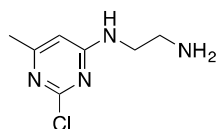

Synthesized using the general procedure as for **4a,b** from 2,4-dichloro-6-methylpyrimidine and ethylenediamine. Purified by flash chromatography EtOAc:Triethylamine (95:5).

**(24a)** Yield 106 mg, 88%, mp >300°C; <sup>1</sup>H NMR (CDCl<sub>3</sub>): δ 1.82 (br s, 2H), 2.21 (s, 3H), 2.83 (t, 2H, *J* = 5.8 Hz), 3.42 (q, 2H, *J* = 5.8 Hz), 5.98 (br s, 1H), 6.35 (s, 1H); <sup>13</sup>C NMR (CDCl<sub>3</sub>): δ 23.1, 40.7, 43.5, 108.9, 160.4, 161.9, 168.9; HRMS calculated for C<sub>7</sub>H<sub>11</sub>ClN<sub>4</sub>, 186.0672; found 186.0677.

**(24b)** Yield 98 mg, 81%, mp 260-264°C; <sup>1</sup>H NMR (CD<sub>3</sub>OD): δ 2.45 (s, 3H), 3.23 (m, 2H), 3.89 (t, 2H, *J* = 6.1 Hz), 6.75 (s, 1H); <sup>13</sup>C NMR (CD<sub>3</sub>OD): δ 17.3, 37.8, 38.3, 103.3 (br), 152.6, 156.7, 163.7; HRMS calculated for C<sub>7</sub>H<sub>11</sub>ClN<sub>4</sub>, 186.0672; found 186.0691.

**[2-(4-Chloro-6-methylpyrimidin-2-ylamino)ethyl]carbamic acid *tert*-butyl ester (25a) and [2-(2-chloro-6-methylpyrimidin-4-ylamino)ethyl]carbamic acid *tert*-butyl ester (25b)**

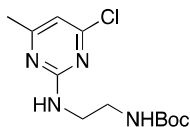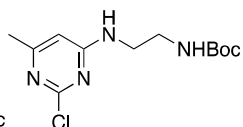

Synthesized using the general procedure as for **4a,b** from 2,4-dichloro-6-methylpyrimidine and *N*-Boc-*N*-ethylenediamine. Purified by flash chromatography EtOAc:Triethylamine (95:5).

**(25a)** Yield 377 mg, 42% mp 135-138°C; <sup>1</sup>H NMR (CDCl<sub>3</sub>): δ 1.42 (s, 9H), 2.25 (s, 3H), 3.34 (q, 2H, *J* = 5.9 Hz), 3.54 (q, 2H, *J* = 5.8 Hz), 5.12 (br s, 1H), 5.69 (br s, 1H), 6.43 (s, 1H). <sup>13</sup>C NMR (CDCl<sub>3</sub>): δ 23.1, 27.8, 40.3, 41.0, 78.8, 108.9, 155.6, 160.6, 161.8, 168.9; HRMS calculated for C<sub>12</sub>H<sub>19</sub>ClN<sub>4</sub>O<sub>2</sub>, 286.1197; found 286.1211.

**(25b)** Yield 502 mg, 53% mp 116-118°C; <sup>1</sup>H NMR (CDCl<sub>3</sub>): δ 1.21 (s, 9H), 2.06 (s, 3H), 3.17 (m, 2H), 3.34 (m, 2H), 5.54 (br s, 1H), 5.97 (s, 1H), 6.50 (br s, 1H); <sup>13</sup>C NMR (CDCl<sub>3</sub>): δ 22.1, 27.5, 39.5, 40.9, 78.7, 102.3 (br), 156.1, 159.2, 163.7, 165.9; HRMS calculated for C<sub>12</sub>H<sub>19</sub>ClN<sub>4</sub>O<sub>2</sub>, 286.1197; found 286.1208.

**4-Chloro-6-methyl-2-(4-methylpiperazin-1-yl)pyrimidine (26a) and 2-chloro-5-methyl-4-(4-methylpiperazin-1-yl)pyrimidine (26b)**

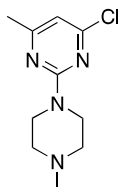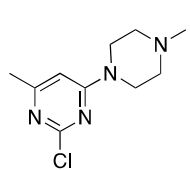

Synthesized using the general procedure as for **4a,b** from 2,4-dichloro-6-methylpyrimidine and *N*-methylpiperazine. Purified by flash chromatography EtOAc:Triethylamine (95:5).

**(26a)** Yield 278 mg, 41% mp 145-148°C; <sup>1</sup>H NMR (CDCl<sub>3</sub>): δ 2.19 (s, 3H), 2.33 (s, 3H), 3.35 (t, 4H), 3.75 (t, 2H), 6.27 (s, 1H). <sup>13</sup>C NMR (CDCl<sub>3</sub>): δ 28.8, 43.7, 46.1, 54.8, 108.2, 160.9, 161.3, 169.0; HRMS calculated for C<sub>10</sub>H<sub>15</sub>ClN<sub>4</sub>, 226.0985; found 226.1001.

**(26b)** Yield 312 mg, 51% mp 118-119°C; <sup>1</sup>H NMR (CDCl<sub>3</sub>): δ 2.19 (s, 3H), 2.32 (s, 3H), 3.35 (t, 4H), 3.54 (t, 2H), 6.13 (s, 1H). <sup>13</sup>C NMR (CDCl<sub>3</sub>): δ 23.7, 43.9, 45.9, 54.4, 99.6, 160.2, 163.2, 167.7; HRMS calculated for C<sub>10</sub>H<sub>15</sub>ClN<sub>4</sub>, 226.0985; found 226.0988.

***N*<sup>2</sup>-(2-(dimethylamino)ethyl)-6-methyl-*N*<sup>4</sup>-propylpyrimidine-2,4-diamine (27a)**

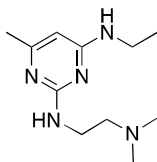

Synthesized using the general procedure as for **5a** from 2-chloro-6-methyl-*N*-propylpyrimidin-4-amine (**10a**) and *N,N*-dimethylethylenediamine. The residue was purified by dry column flash chromatography using EtOAc followed by 1:1 CHCl<sub>3</sub>:CH<sub>3</sub>OH to yield the target compound.

**(27a)** yield 52 mg, 51% pale yellow oil; <sup>1</sup>H NMR (CDCl<sub>3</sub>): δ 0.92 (t, 3H, *J* = 7.4 Hz), 1.56 (m, 2H), 2.14 (s, 3H), 2.20 (s, 6H), 2.43 (t, 2H, *J* = 6.3 Hz), 3.19 (q, 2H, *J* = 6.7 Hz), 3.40 (m, 2H), 4.78 (br s, 1H), 5.21 (br s, 1H), 5.50 (s, 1H); <sup>13</sup>C NMR (CDCl<sub>3</sub>): δ 10.8, 22.2, 23.1, 38.4, 42.5, 44.6, 58.0, 91.5 (br), 161.6, 163.3, 165.0; HRMS calculated for C<sub>11</sub>H<sub>21</sub>N<sub>5</sub>, 223.1797; found 223.1790.

***N*<sup>4</sup>-(2-Dimethylaminoethyl)-6-methyl-*N*<sup>2</sup>-propylpyrimidine-2,4-diamine (27b)**

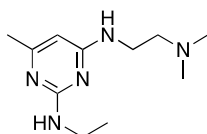

Synthesized using the general procedure as for **5b** from 4-chloro-6-methyl-*N*-propylpyrimidin-2-amine (**10b**) and *N,N*-dimethylethylenediamine. The residue was purified by short column chromatography using EtOAc followed by 1:1 CHCl<sub>3</sub>:CH<sub>3</sub>OH to yield the target compound.

**(27b)** yield 52 mg, 51% pale yellow oil; <sup>1</sup>H NMR (CDCl<sub>3</sub>): δ 0.90 (t, 3H, *J* = 7.4 Hz), 1.61 (m, 2H), 2.19 (s, 6H), 2.21 (s, 3H), 2.36 (t, 2H, *J* = 6 Hz), 3.29 (m, 4H), 5.32 (br s, 1H), 5.50 (s, 1H); <sup>13</sup>C NMR (CDCl<sub>3</sub>): δ 10.8, 22.4, 34.9, 37.9, 42.5, 44.4, 57.3, 92.2 (br), 160.5, 161.1, 163.0; HRMS calculated for C<sub>11</sub>H<sub>21</sub>N<sub>5</sub>, 223.1797; found 223.1806.

***N*<sup>4</sup>-Butyl-*N*<sup>2</sup>-(2-dimethylaminoethyl)-6-methylpyrimidine-2,4-diamine (28a)**

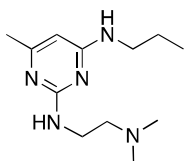

Synthesized using the general procedure as for **5a** from *N*-butyl-2-chloro-6-methylpyrimidin-4-amine (**11a**) and *N,N*-dimethylethylenediamine. The residue was purified by short column chromatography using EtOAc followed by 1:1 CHCl<sub>3</sub>:CH<sub>3</sub>OH to yield the target compound.

**(28a)** yield 280 mg, 82% pale yellow oil; <sup>1</sup>H NMR (CDCl<sub>3</sub>): δ 0.73 (t, 3H, *J* = 7.3 Hz), 1.18 (m, 2H), 1.33 (q, 2H, *J* = 6.6 Hz), 1.96 (s, 3H), 2.04 (s, 6H), 2.27 (t, 2H, *J* = 6.5 Hz), 3.08 (q, 2H, *J* = 6.8 Hz), 3.25 (t, 2H, *J* = 6.4 Hz), 4.13 (br s, 1H), 5.17 (br s, 1H), 5.38 (s, 1H); <sup>13</sup>C NMR (CDCl<sub>3</sub>): δ 13.0, 19.3, 22.7, 35.2, 38.2, 40.1, 44.5, 57.8, 91.8 (br), 161.5, 163.1, 164.0 (br); HRMS calculated for C<sub>12</sub>H<sub>23</sub>N<sub>5</sub>, 237.1953; found 237.1959.

***N*<sup>2</sup>-Butyl-*N*<sup>4</sup>-(2-dimethylaminoethyl)-6-methylpyrimidine-2,4-diamine (28b)**

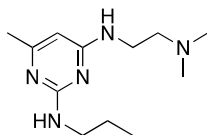

Synthesized using the general procedure as for **5b** from *N*-butyl-4-chloro-6-methylpyrimidin-2-amine (**11b**) and *N,N*-dimethylethylenediamine. The residue was purified by dry column flash chromatography using EtOAc followed by 1:1 CHCl<sub>3</sub>:CH<sub>3</sub>OH to yield the target compound.

**(28b)** yield 191 mg, 85% pale yellow oil; <sup>1</sup>H NMR (CDCl<sub>3</sub>): δ 0.81 (t, 3H, *J* = 7.3 Hz), 1.25 (m, 2H), 1.41 (p, 2H, *J* = 6.7 Hz) 2.02 (s, 3H), 2.11 (s, 6H), 2.35 (t, 2H, *J* = 6.2 Hz), 3.24 (m, 4H), 4.08 (br s, 1H), 5.06 (br s, 1H), 5.53 (s, 1H); <sup>13</sup>C NMR (CDCl<sub>3</sub>): δ 13.1, 19.4, 22.7, 31.4, 37.8, 40.3, 44.5, 57.5, 92.1 (br), 161.5, 163.0, 163.9; HRMS calculated for C<sub>12</sub>H<sub>23</sub>N<sub>5</sub>, 237.1953; found 237.1965.

***N*<sup>4</sup>-Butyl-*N*<sup>2</sup>-(2-dimethylaminoethyl)-6-methylpyrimidine-2,4-diamine (29a)**

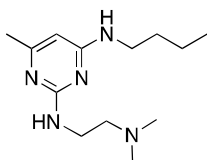

Synthesized using the general procedure as for **5a** from *N*-butyl-2-chloro-6-methylpyrimidin-4-amine (**12a**) and *N,N*-dimethylethylenediamine. The residue was purified by dry column flash chromatography using EtOAc followed by 1:1 CHCl<sub>3</sub>:CH<sub>3</sub>OH to yield the target compound.

**(29a)** yield 280 mg, 82% pale yellow oil; <sup>1</sup>H NMR (CDCl<sub>3</sub>): δ 0.73 (t, 3H, *J* = 7.3 Hz), 1.18 (m, 2H), 1.33 (q, 2H, *J* = 6.6 Hz), 1.96 (s, 3H), 2.04 (s, 6H), 2.27 (t, 2H, *J* = 6.5 Hz), 3.08 (q, 2H, *J* = 6.8 Hz), 3.25 (t, 2H, *J* = 6.4 Hz), 4.13 (br s, 1H), 5.17 (br s, 1H), 5.38 (s, 1H); <sup>13</sup>C NMR (CDCl<sub>3</sub>): δ 13.0, 19.3, 22.7, 35.2, 38.2, 40.1, 44.5, 57.8, 91.8 (br), 161.5, 163.1, 164.0 (br); HRMS calculated for C<sub>13</sub>H<sub>25</sub>N<sub>5</sub>, 251.2110; found 251.2119.

***N*<sup>2</sup>-Butyl-*N*<sup>4</sup>-(2-dimethylaminoethyl)-6-methylpyrimidine-2,4-diamine (29b)**

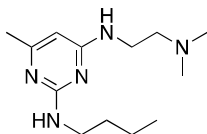

Synthesized using the general procedure as for **5b** from *N*-butyl-4-chloro-6-methylpyrimidin-2-amine (**12b**) and *N,N*-dimethylethylenediamine. The residue was purified by dry column flash chromatography using EtOAc followed by 1:1 CHCl<sub>3</sub>:CH<sub>3</sub>OH to yield the target compound.

**(29b)** yield 191 mg, 85% pale yellow oil; <sup>1</sup>H NMR (CDCl<sub>3</sub>): δ 0.81 (t, 3H, *J* = 7.3 Hz), 1.25 (m, 2H), 1.41 (p, 2H, *J* = 6.7 Hz) 2.02 (s, 3H), 2.11 (s, 6H), 2.35 (t, 2H, *J* = 6.2 Hz), 3.24 (m, 4H), 4.08 (br s, 1H), 5.06 (br s, 1H), 5.53 (s, 1H); <sup>13</sup>C NMR (CDCl<sub>3</sub>): δ 13.1, 19.4, 22.7, 31.4, 37.8, 40.3, 44.5, 57.5, 92.1 (br), 161.5, 163.0, 163.9; HRMS calculated for C<sub>13</sub>H<sub>25</sub>N<sub>5</sub>, 251.2110; found 251.2120.

***N*<sup>2</sup>-(2-Dimethylaminoethyl)-*N*<sup>4</sup>-hexyl-6-methylpyrimidine-2,4-diamine (30a)**

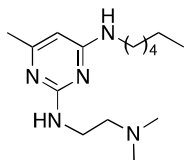

Synthesized using the general procedure as for **5a** from 2-chloro-*N*-hexyl-6-methylpyrimidin-4-amine (**13a**) and *N,N*-dimethylethylenediamine. The residue was purified by dry column flash chromatography using EtOAc followed by 1:1 CHCl<sub>3</sub>:CH<sub>3</sub>OH to yield the target compound.

**(30a)** yield 36 mg, 15% pale yellow oil; <sup>1</sup>H NMR (CDCl<sub>3</sub>): δ 0.88 (t, 3H), 1.28 (m, 6H), 1.53 (m, 2H), 2.17 (s, 3H), 2.26 (s, 6H), 2.46 (t, 2H, *J* = 6.3 Hz), 3.20 (q, 2H, *J* = 5.9 Hz), 3.41 (m, 2H), 4.70 (br s, 1H), 5.30 (br s, 1H), 5.55 (s, 1H); <sup>13</sup>C NMR (CDCl<sub>3</sub>): δ 13.3, 21.9, 23.0, 26.0, 29.0, 30.9, 38.4, 40.7, 44.6, 58.0, 91.6 (br), 161.4, 163.2, 164.7; HRMS calculated for C<sub>15</sub>H<sub>29</sub>N<sub>5</sub>, 279.2423; found 279.2431.

***N*<sup>4</sup>-(2-Dimethylaminoethyl)-*N*<sup>2</sup>-hexyl-6-methylpyrimidine-2,4-diamine (30b)**

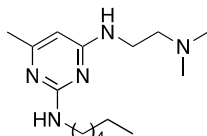

Synthesized using the general procedure as for **5b** from 4-chloro-*N*-hexyl-6-methylpyrimidin-2-amine (**13b**) and *N,N*-dimethylethylenediamine. The residue was purified by dry column flash chromatography using EtOAc followed by 1:1 CHCl<sub>3</sub>:CH<sub>3</sub>OH to yield the target compound.

**(30b)** yield 29 mg, 43% pale yellow oil; <sup>1</sup>H NMR (CDCl<sub>3</sub>): δ 0.86 (t, 3H, *J* = 6.4 Hz), 1.35 (m, 6H), 1.48 (m, 2H), 2.16 (s, 3H), 2.22 (s, 6H), 2.45 (t, 2H, *J* = 6.2 Hz), 3.28-3.36 (m, 4H), 4.96 (br s, 1H), 5.19 (br s, 1H), 5.52 (s, 1H); <sup>13</sup>C NMR (CDCl<sub>3</sub>): δ 13.3, 21.9, 22.9, 26.1, 29.3, 31.0, 37.9, 40.6, 44.5, 57.5, 92.2 (br), 161.6, 163.1, 164.2; HRMS calculated for C<sub>15</sub>H<sub>29</sub>N<sub>5</sub>, 279.2423; found 279.2429.

***N*<sup>2</sup>-(2-Dimethylaminoethyl)-*N*<sup>4</sup>-octyl-6-methylpyrimidine-2,4-diamine (31a)**

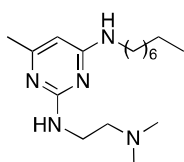

Synthesized using the general procedure as for **5a** from 2-chloro-6-methyl-*N*-octylpyrimidin-4-amine (**14a**) and *N,N*-dimethylethylenediamine. The residue was purified by dry column flash chromatography using EtOAc followed by 1:1 CHCl<sub>3</sub>:CH<sub>3</sub>OH to yield the target compound.

**(31a)** yield 203 mg, 72% pale yellow oil;  $^1\text{H}$  NMR ( $\text{CDCl}_3$ ):  $\delta$  0.77 (t, 3H), 1.15 (m, 10H), 1.40 (m, 2H), 2.01 (s, 3H), 2.09 (s, 6H), 2.31 (t, 2H,  $J = 6.3$  Hz), 3.10 (q, 2H,  $J = 6.2$  Hz) 3.31 (m, 2H), 4.97 (br s, 1H), 5.21 (br s, 1H), 5.41 (s, 1H);  $^{13}\text{C}$  NMR ( $\text{CDCl}_3$ ):  $\delta$  13.3, 21.9, 23.0, 26.3, 28.5, 28.6, 28.9, 31.0, 38.3, 40.5, 44.5, 57.9, 91.6 (br), 161.5, 163.1, 164.6; HRMS calculated for  $\text{C}_{17}\text{H}_{33}\text{N}_5$ , 307.2736; found 307.2744.

***N*<sup>4</sup>-(2-Dimethylaminoethyl)-*N*<sup>2</sup>-octyl-6-methylpyrimidine-2,4-diamine (31b)**

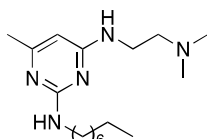

Synthesized using the general procedure as for **5b** from 4-chloro-6-methyl-*N*-octylpyrimidin-2-amine (**14b**) and *N,N*-dimethylethylenediamine. The residue was purified by dry column flash chromatography using EtOAc followed by 1:1  $\text{CHCl}_3$ : $\text{CH}_3\text{OH}$  to yield the target compound.

**(31b)** yield 57 mg, 35% pale yellow oil;  $^1\text{H}$  NMR ( $\text{CDCl}_3$ ):  $\delta$  0.86 (t, 3H), 1.38 (m, 10H), 1.50 (m, 2H), 2.16 (s, 3H), 2.22 (s, 6H), 2.45 (t, 2H,  $J = 5.8$  Hz), 3.33 (m, 4H), 4.91 (br s, 1H), 5.15 (br s, 1H), 5.53 (s, 1H);  $^{13}\text{C}$  NMR ( $\text{CDCl}_3$ ):  $\delta$  13.3, 22.0, 22.9, 26.4, 28.6, 28.7, 29.3, 31.2, 37.9, 40.7, 44.5, 57.4, 91.2 (br), 161.5, 163.0, 164.5; HRMS calculated for  $\text{C}_{17}\text{H}_{33}\text{N}_5$ , 307.2736; found 307.2746.

***N*<sup>2</sup>-(2-Dimethylaminoethyl)-*N*<sup>4</sup>-decyl-6-methylpyrimidine-2,4-diamine (32a)**

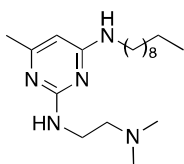

Synthesized using the general procedure as for **5a** from 2-chloro-*N*-decyl-6-methylpyrimidin-4-amine (**15a**) and *N,N*-dimethylethylenediamine. The residue was purified by dry column flash chromatography using EtOAc followed by 1:1  $\text{CHCl}_3$ : $\text{CH}_3\text{OH}$  to yield the target compound.

**(32a)** yield 230 mg, 68% pale yellow oil;  $^1\text{H}$  NMR ( $\text{CDCl}_3$ ):  $\delta$  0.71 (t, 3H,  $J = 6.2$  Hz), 1.13 (s, 14H), 1.39 (m, 2H), 1.98 (s, 3H), 2.08 (s, 6H), 2.33 (t, 2H,  $J = 6.3$  Hz), 3.16 (m, 2H) 3.29 (t, 2H,  $J = 6.3$  Hz), 5.39 (br s, 1H), 5.57 (s, 1H), 6.15 (br s, 1H);  $^{13}\text{C}$  NMR ( $\text{CDCl}_3$ ):  $\delta$  13.2, 21.9, 26.3, 28.5, 28.6, 28.7, 28.8 (2 x C), 28.9, 31.1, 38.2, 40.5, 44.4, 57.7, 93.0 (br), 159.0 (br), 159.8 (br), 162.9; HRMS calculated for  $\text{C}_{19}\text{H}_{37}\text{N}_5$ , 335.3049; found 335.3062.

***N*<sup>4</sup>-(2-Dimethylaminoethyl)-*N*<sup>2</sup>-decyl-6-methylpyrimidine-2,4-diamine (32b)**

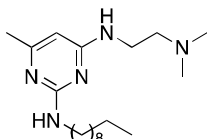

Synthesized using the general procedure as for **5b** from 4-chloro-*N*-decyl-6-methylpyrimidin-2-amine (**15b**) and *N,N*-dimethylethylenediamine. The residue was purified by dry column flash chromatography using EtOAc followed by 1:1  $\text{CHCl}_3$ : $\text{CH}_3\text{OH}$  to yield the target compound.

**(32b)** yield 217 mg, 80% pale yellow oil;  $^1\text{H}$  NMR ( $\text{CDCl}_3$ ):  $\delta$  0.81 (t, 3H,  $J = 7.0$  Hz), 1.25 (m, 14H), 1.46 (m, 2H), 2.08 (s, 3H), 2.15 (s, 6H), 2.38 (t, 2H,  $J = 6.3$  Hz), 3.16 (q, 2H,  $J = 6.3$  Hz) 3.35 (t, 2H,  $J = 6.1$  Hz), 4.97 (br s, 1H), 5.30 (br s, 1H), 5.47 (s, 1H);  $^{13}\text{C}$  NMR ( $\text{CDCl}_3$ ):  $\delta$  13.3, 21.9, 22.8, 26.3, 28.5, 28.6, 28.7, 28.8, 28.9, 31.2, 38.3, 40.6, 44.5, 57.9, 91.7 (br), 161.3, 163.2, 164.6 (br); HRMS calculated for  $\text{C}_{19}\text{H}_{37}\text{N}_5$ , 335.3049; found 335.3056.

***N*<sup>2</sup>-(2-Dimethylaminoethyl)-6-methyl-*N*<sup>4</sup>-tetradecylpyrimidine-2,4-diamine (33a)**

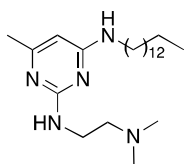

Synthesized using the general procedure as for **5a** from 2-chloro-6-methyl-*N*-tetradecylpyrimidin-4-amine (**16a**) and *N,N*-dimethylethylenediamine. The residue was purified by dry column flash chromatography using EtOAc followed by 1:1  $\text{CHCl}_3$ : $\text{CH}_3\text{OH}$  to yield the target compound.

**(33a)** yield 174 mg, 51%, mp 51-53°C;  $^1\text{H}$  NMR ( $\text{CDCl}_3$ ):  $\delta$  0.84 (t, 3H,  $J = 6.2$  Hz), 1.25 (s, 22H), 1.50 (m, 2H), 2.10 (s, 3H), 2.19 (s, 6H), 2.42 (t, 2H,  $J = 6.2$  Hz), 3.19, (q, 2H,  $J = 6.5$  Hz), 3.38 (t, 2H,  $J = 6.2$  Hz), 4.36 (br s, 1H), 5.21 (br s, 1H), 5.53 (s, 1H);  $^{13}\text{C}$  NMR ( $\text{CDCl}_3$ ):  $\delta$  13.3, 21.9, 22.1 (br), 26.4, 28.6, 28.7, 28.8, 28.9 (2 x C), 29.0 (4 x C), 31.3, 38.3, 40.7, 44.6, 57.9, 92.1 (br), 160.6, 162.9 (br), 163.1; HRMS calculated for  $\text{C}_{23}\text{H}_{45}\text{N}_5$ , 391.3675; found 391.3680.

***N*<sup>4</sup>-(2-Dimethylaminoethyl)-6-methyl-*N*<sup>2</sup>-tetradecylpyrimidine-2,4-diamine (33b)**

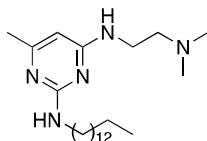

Synthesized using the general procedure as for **5b** from 4-chloro-6-methyl-*N*-tetradecylpyrimidin-2-amine (**16b**) and *N,N*-dimethylethylenediamine. The residue was purified by dry column flash chromatography using EtOAc followed by 1:1  $\text{CHCl}_3$ : $\text{CH}_3\text{OH}$  to yield the target compound.

**(33b)** yield 271 mg, 87%, mp 65-66°C;  $^1\text{H}$  NMR ( $\text{CDCl}_3$ ):  $\delta$  0.84 (t, 3H,  $J = 7.0$  Hz), 1.25 (s, 22H), 1.53 (m, 2H), 2.14 (s, 3H), 2.19 (s, 6H), 2.43 (t, 2H,  $J = 6.2$  Hz), 3.32 (m, 4H), 4.92 (br s, 1H), 5.21 (br s, 1H), 5.50 (s, 1H);  $^{13}\text{C}$  NMR ( $\text{CDCl}_3$ ):  $\delta$  13.3, 22.0, 23.1, 26.4, 28.7, 28.8, 28.9 (3 x C), 29.0 (2 x C), 29.1, 29.3, 31.3, 37.9, 40.8, 44.5, 57.5, 92.1 (br), 161.7, 163.0, 164.4; HRMS calculated for  $\text{C}_{23}\text{H}_{45}\text{N}_5$ , 391.3675; found 391.3682.

***N*<sup>2</sup>-(2-Dimethylaminoethyl)-6-methyl-*N*<sup>4</sup>-octadecylpyrimidine-2,4-diamine (34a)**

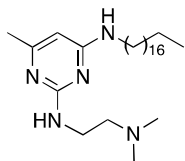

Synthesized using the general procedure as for **5a** from 2-chloro-6-methyl-*N*-octadecylpyrimidin-4-amine and *N,N*-dimethylethylenediamine. The residue was purified by dry column flash chromatography using EtOAc followed by 1:1 CHCl<sub>3</sub>:CH<sub>3</sub>OH to yield the target compound.

**(34a)** yield 177 mg, 71%, mp 64-66°C; <sup>1</sup>H NMR (CDCl<sub>3</sub>): δ 0.84 (t, 3H, *J* = 6.8 Hz), 1.23 (s, 30H), 1.50 (m, 2H), 2.13 (s, 3H), 2.20 (s, 6H), 2.43 (t, 2H, *J* = 6.3 Hz), 3.19 (q, 2H, *J* = 6.2 Hz), 3.40 (t, 2H, *J* = 6.1 Hz), 4.98 (br s, 1H), 5.53 (br s, 2H); <sup>13</sup>C NMR (CDCl<sub>3</sub>): δ 13.3, 21.9, 22.1 (br), 26.4, 28.4, 28.6, 28.7, 28.8 (2 x C), 28.9 (3 x C), 29.0 (2 C's), 29.1 (2C's), 29.2, 31.2, 38.4, 40.7, 44.6, 57.9, 91.9 (br), 160.9, 163.2, 163.1 (br); HRMS calculated for C<sub>27</sub>H<sub>53</sub>N<sub>5</sub>, 447.4301; found 447.4312.

***N*<sup>4</sup>-(2-Dimethylaminoethyl)-6-methyl-*N*<sup>2</sup>-octadecylpyrimidine-2,4-diamine (34b)**

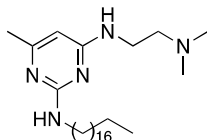

Synthesized using the general procedure as for **5b** from 4-chloro-6-methyl-*N*-octadecylpyrimidin-2-amine and *N,N*-dimethylethylenediamine. The residue was purified by dry column flash chromatography using EtOAc followed by 1:1 CHCl<sub>3</sub>:CH<sub>3</sub>OH to yield the target compound.

**(34b)** Yield 259 mg, 76%, mp 60-62°C; <sup>1</sup>H NMR (CDCl<sub>3</sub>): δ 0.83 (t, 3H, *J* = 6.5 Hz), 1.22 (s, 30H), 1.48 (m, 2H), 2.11 (s, 3H), 2.19 (s, 6H), 2.43 (t, 2H, *J* = 6.1 Hz), 3.30 (m, 4H), 5.08 (br s, 1H), 5.32 (br s, 1H), 5.49 (s, 1H); <sup>13</sup>C NMR (CDCl<sub>3</sub>): δ 13.4, 22.0, 23.1, 26.4, 28.7 (3 x C), 28.8 (2 x C), 28.9 (3 x C), 29.0 (2 x C), 29.1, 29.2, 29.3, 31.3, 37.9, 40.7, 44.5, 57.5, 92.2 (br), 161.4, 163.0, 163.8 (br); HRMS calculated for C<sub>27</sub>H<sub>53</sub>N<sub>5</sub>, 447.4301; found 447.34305.

***N*<sup>4</sup>-sec-Butyl-*N*<sup>2</sup>-(2-dimethylaminoethyl)-6-methylpyrimidine-2,4-diamine (35a)**

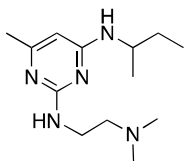

Synthesized using the general procedure as for **5a** from *N*-sec-butyl-2-chloro-6-methylpyrimidin-4-amine (**17a**) and *N,N*-dimethylethylenediamine. The residue was purified by dry column flash chromatography using EtOAc followed by 1:1 CHCl<sub>3</sub>:CH<sub>3</sub>OH to yield the target compound.

**(35a)** yield 161 mg, 86% pale yellow oil; <sup>1</sup>H NMR (CDCl<sub>3</sub>): δ 0.91 (t, 3H, *J* = 7.4 Hz), 1.14 (d, 3H, *J* = 6.6 Hz), 1.52 (m, 2H), 2.08 (s, 3H), 2.27 (s, 6H), 2.52 (t, 2H, *J* = 6.8 Hz), 3.45 (t, 2H, *J* = 6.8 Hz), 3.92 (m, 1H), 5.63 (s, 1H); <sup>13</sup>C NMR (CDCl<sub>3</sub>): δ 9.0, 18.7, 22.3, 28.7, 37.9, 43.7, 48.0, 57.9, 92.9 (br), 161.4, 163.0, 164.2; HRMS calculated for C<sub>13</sub>H<sub>25</sub>N<sub>5</sub>, 251.2110; found 251.2124.

***N*<sup>2</sup>-sec-Butyl-*N*<sup>4</sup>-(2-dimethylaminoethyl)-6-methylpyrimidine-2,4-diamine (35b)**

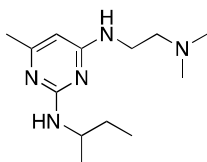

Synthesized using the general procedure as for **5b** from *N*-sec-butyl-4-chloro-6-methylpyrimidin-2-amine (**17b**) and *N,N*-dimethylethylenediamine. The residue was purified by dry column flash chromatography using EtOAc followed by 1:1 CHCl<sub>3</sub>:CH<sub>3</sub>OH to yield the target compound.

**(35b)** yield 224 mg, 89% pale yellow oil; <sup>1</sup>H NMR (CDCl<sub>3</sub>): δ 0.78 (t, 3H, *J* = 7.4 Hz), 1.03 (d, 3H, *J* = 6.5 Hz), 1.25 (m, 2H), 1.99 (s, 3H), 2.09 (s, 6H), 2.33 (t, 2H, *J* = 6.2 Hz), 3.22 (q, 2H, *J* = 6 Hz), 3.85 (m, 1H), 4.72 (br s, 1H), 5.32 (br s, 1H), 5.40 (s, 1H); <sup>13</sup>C NMR (CDCl<sub>3</sub>): δ 9.5, 19.8, 22.8, 29.1, 37.7, 44.5, 47.0, 57.5, 92.1 (br), 161.2, 163.0, 164.1; HRMS calculated for C<sub>13</sub>H<sub>25</sub>N<sub>5</sub>, 251.2110; found 251.2111.

**2-(2-Dimethylaminoethyl)-4-*N*-(didecylamino)-6-methylpyrimidine (36a)**

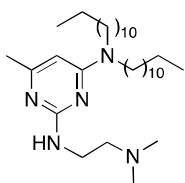

Synthesized using the general procedure as for **5a** from 2-chloro-*N,N*-didecyl-6-methylpyrimidin-4-amine and *N,N*-dimethylethylenediamine. The residue was purified by dry column flash chromatography using EtOAc followed by 1:1 CHCl<sub>3</sub>:CH<sub>3</sub>OH to yield the target compound.

**(36a)** Yield 466 mg, 72% pale yellow oil; <sup>1</sup>H NMR (CDCl<sub>3</sub>): δ 0.76 (t, 6H, *J* = 6.5 Hz), 1.19 (s, 28H), 1.47 (m, 4H), 2.12 (s, 3H), 2.18 (s, 6H), 2.45 (t, 2H, *J* = 6.9 Hz), 3.45 (m, 6H), 5.47 (s, 1H); <sup>13</sup>C NMR (CDCl<sub>3</sub>): δ 13.3, 21.9, 22.1, 26.3, 27.0, 28.5, 28.7, 28.8 (2 x C), 31.2, 38.2, 44.5, 48.0, 57.4, 90.8, 156.8, 157.3, 163.4; HRMS calculated for C<sub>29</sub>H<sub>57</sub>N<sub>5</sub>, 475.4614; found 475.4629.

#### 4-(2-Dimethylaminoethyl)-2-*N*-(didecylamino)-6-methylpyrimidine (36b)

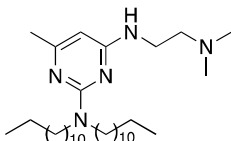

Synthesized using the general procedure as for **5b** from 4-chloro-*N,N*-didecyl-6-methylpyrimidin-2-amine and *N,N*-dimethylethylenediamine. The residue was purified by dry column flash chromatography using EtOAc followed by 1:1 CHCl<sub>3</sub>:CH<sub>3</sub>OH to yield the target compound.

**(36b)** Yield 150 mg, 56%, mp 66-68°C; <sup>1</sup>H NMR (CDCl<sub>3</sub>): δ 0.90 (t, 6H, *J* = 6.6 Hz), 1.33 (s, 28H), 1.58 (m, 4H), 2.14 (s, 3H), 2.26 (s, 6H), 2.49 (t, 2H, *J* = 6.1 Hz), 3.38 (q, 2H, *J* = 5.5 Hz), 3.51 (t, 4H, *J* = 7 Hz), 5.49 (s, 1H); <sup>13</sup>C NMR (CDCl<sub>3</sub>): δ 13.4, 22.0, 23.4, 26.5, 27.5, 28.7, 28.9 (2 x C), 29.0, 31.3, 37.8, 44.6, 46.7, 57.8, 92.1, 161.0, 162.7, 164.4; HRMS calculated for C<sub>29</sub>H<sub>57</sub>N<sub>5</sub>, 475.4614; found 475.4603.

#### *N*<sup>d</sup>-Cyclohexyl-*N*<sup>2</sup>-(2-dimethylaminoethyl)-6-methylpyrimidine-2,4-diamine (37a)

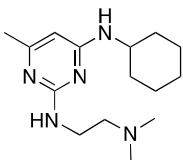

Synthesized using the general procedure as for **5a** from 2-chloro-*N*-cyclohexyl-6-methylpyrimidin-4-amine (**18a**) and *N,N*-dimethylethylenediamine. The residue was purified by dry column flash chromatography using EtOAc followed by 1:1 CHCl<sub>3</sub>:CH<sub>3</sub>OH to yield the target compound.

**(37a)** Yield 162 mg, 74% pale yellow oil; <sup>1</sup>H NMR (CDCl<sub>3</sub>): δ 1.15 (m, 6H), 1.55 (m, 2H), 1.92 (m, 2H), 2.02 (s, 3H), 2.09 (s, 6H), 2.32 (t, 2H, *J* = 6.3 Hz), 3.28 (m, 2H), 3.32-3.48 (m, 1H), 4.88 (br s, 1H), 5.28 (br s, 1H), 5.43 (s, 1H); <sup>13</sup>C NMR (CDCl<sub>3</sub>): δ 22.8, 24.3, 25.1, 32.5, 38.3, 44.5, 48.9, 57.9, 92.0 (br), 161.3, 162.2, 163.9; HRMS calculated for C<sub>15</sub>H<sub>27</sub>N<sub>5</sub>, 277.2266; found 277.2269.

#### *N*<sup>2</sup>-Cyclohexyl-*N*<sup>d</sup>-(2-dimethylaminoethyl)-6-methylpyrimidine-2,4-diamine (37b)

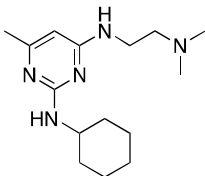

Synthesized using the general procedure as for **5b** from 4-chloro-*N*-cyclohexyl-6-methylpyrimidin-2-amine (**18b**) and *N,N*-dimethylethylenediamine. The residue was purified by dry column flash chromatography using EtOAc followed by 1:1 CHCl<sub>3</sub>:CH<sub>3</sub>OH to yield the target compound.

**(37b)** Yield 161 mg, 86% pale yellow oil; <sup>1</sup>H NMR (CDCl<sub>3</sub>): δ 1.52 (m, 8H), 1.89 (m, 2H), 2.04 (s, 3H), 2.15 (s, 6H), 2.38 (t, 2H, *J* = 6.2 Hz), 3.25 (q, 2H, *J* = 6.0 Hz), 3.66 (m, 1H), 4.76 (br s, 1H), 5.25 (br s, 1H), 5.44 (s, 1H); <sup>13</sup>C NMR (CDCl<sub>3</sub>): δ 22.4, 24.3, 25.3, 32.2, 38.5, 44.8, 49.2, 58.1, 92.2 (br), 161.5, 162.5, 164.0 (br); HRMS calculated for C<sub>15</sub>H<sub>27</sub>N<sub>5</sub>, 277.2266; found 277.2273.

#### *N*<sup>d</sup>-Benzyl-*N*<sup>2</sup>-(2-dimethylaminoethyl)-6-methylpyrimidine-2,4-diamine (38a)

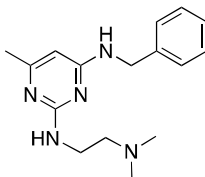

Synthesized using the general procedure as for **5a** from *N*-benzyl-2-chloro-6-methylpyrimidin-4-amine (**19a**) and *N,N*-dimethylethylenediamine. The residue was purified by dry column flash chromatography using EtOAc followed by 1:1 CHCl<sub>3</sub>:CH<sub>3</sub>OH to yield the target compound.

**(38a)** Yield 87 mg, 37% pale yellow oil; <sup>1</sup>H NMR (CDCl<sub>3</sub>): δ 2.14 (s, 3H), 2.21 (s, 6H), 2.44 (t, 2H, *J* = 6.3 Hz), 3.45 (q, 2H), 4.48 (d, 2H, *J* = 5.8 Hz), 5.08 (br s, 1H), 5.32 (br s, 1H), 5.56 (s, 1H), 7.30 (m, 5H); <sup>13</sup>C NMR (CDCl<sub>3</sub>): δ 23.1, 38.4, 44.6, 57.9, 92.0 (br), 126.6, 126.7, 128.0, 138.5, 161.7, 163.1, 165.2; HRMS calculated for C<sub>16</sub>H<sub>23</sub>N<sub>5</sub>, 285.1953; found 285.1950.

#### *N*<sup>2</sup>-Benzyl-*N*<sup>d</sup>-(2-dimethylaminoethyl)-6-methylpyrimidine-2,4-diamine (38b)

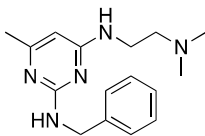

Synthesized using the general procedure as for **5b** from *N*-benzyl-4-chloro-6-methylpyrimidin-2-amine (**19b**) and *N,N*-dimethylethylenediamine. The residue was purified by dry column flash chromatography using EtOAc followed by 1:1 CHCl<sub>3</sub>:CH<sub>3</sub>OH to yield the target compound.

**(38b)** yield 53 mg, 32% pale yellow oil; <sup>1</sup>H NMR (CDCl<sub>3</sub>): δ 2.16 (s, 3H), 2.22 (s, 6H), 2.44 (t, 2H, *J* = 6.2 Hz), 3.28 (q, 2H, *J* = 6.4 Hz), 4.59 (d, 2H, *J* = 5.6 Hz), 5.19 (br s, 1H), 5.38 (br s, 1H), 5.57 (s, 1H), 7.28 (m, 5H); <sup>13</sup>C NMR (CDCl<sub>3</sub>): δ 23.0, 37.9, 44.5, 44.8, 57.5, 92.7 (br), 126.2, 126.9, 127.8, 139.6, 161.5, 163.1, 164.6 (br); HRMS calculated for C<sub>16</sub>H<sub>23</sub>N<sub>5</sub>, 285.1953; found 285.1960.

#### *N*<sup>d</sup>-Cyclopropylmethyl-*N*<sup>2</sup>-(2-dimethylaminoethyl)-6-methyl-*N*<sup>d</sup>-propylpyrimidine-2,4-diamine (39a)

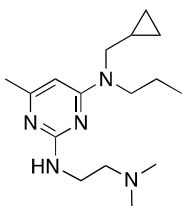

Synthesized using the general procedure as for **5a** from 2-chloro-*N*-(cyclopropylmethyl)-6-methyl-*N*-propylpyrimidin-4-amine (**21a**) and *N,N*-dimethylethylenediamine. The residue was purified by dry column flash chromatography using EtOAc followed by 1:1 CHCl<sub>3</sub>:CH<sub>3</sub>OH to yield the target compound.

**(39a)** yield 285 mg, 85% pale yellow oil;  $^1\text{H}$  NMR ( $\text{CDCl}_3$ ):  $\delta$  0.05 (d, 2H,  $J = 7.4$  Hz), 0.30 (d, 2H,  $J = 7.8$  Hz), 0.72 (t, 3H, 7.3 Hz), 0.87 (m, 1H), 1.45 (m, 2H), 1.99 (s, 3H), 2.05 (s, 6H), 2.26 (t, 2H,  $J = 6.2$  Hz), 3.28 (m, 6H), 5.20 (br s, 1H), 5.47 (s, 1H);  $^{13}\text{C}$  NMR ( $\text{CDCl}_3$ ):  $\delta$  2.9, 9.2, 10.6, 20.1, 23.1, 38.3, 44.5, 49.1, 51.2, 58.0, 90.8, 161.2, 162.0, 164.1; HRMS calculated for  $\text{C}_{16}\text{H}_{29}\text{N}_5$ , 291.2423; found 291.2431.

**$N^2$ -Cyclopropylmethyl- $N^4$ -(2-dimethylamin-ethyl)-6-methyl- $N^2$ -propylpyrimidine-2,4-diamine (39b)**

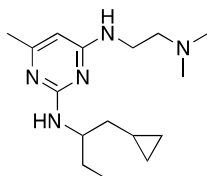

Synthesized using the general procedure as for **5b** from 4-chloro- $N$ -(cyclopropylmethyl)-6-methyl- $N$ -propylpyrimidin-2-amine (**21b**) and  $N,N$ -dimethylethylenediamine. The residue was purified by dry column flash chromatography using EtOAc followed by 1:1  $\text{CHCl}_3$ : $\text{CH}_3\text{OH}$  to yield the target compound.

Yield 133 mg, 48% pale yellow oil;  $^1\text{H}$  NMR ( $\text{CDCl}_3$ ):  $\delta$  0.22 (q, 2H,  $J = 5$  Hz), 0.41 (q, 2H,  $J = 6.5$  Hz), 0.86 (t, 3H, 7.4 Hz), 1.08 (m, 1H), 1.62 (m, 2H), 2.10 (s, 3H), 2.18 (s, 6H), 2.45 (t, 2H,  $J = 6.2$  Hz), 3.34 (q, 2H,  $J = 5.6$  Hz), 3.44 (d, 2H,  $J = 6.7$  Hz), 3.54 (t, 2H,  $J = 7.5$  Hz), 4.92 (br s, 1H), 5.46 (s, 1H);  $^{13}\text{C}$  NMR ( $\text{CDCl}_3$ ):  $\delta$  2.9, 9.7, 10.9, 20.5, 23.5, 37.8, 44.5, 48.4, 50.7, 57.8, 91.2, 161.3, 162.7, 164.6; HRMS calculated for  $\text{C}_{16}\text{H}_{29}\text{N}_5$ , 291.2423; found 291.2429.

**$N^4$ -Decyl- $N^2$ -(2-dimethylaminoethyl)pyrimidine-2,4-diamine (40a) <sup>S8</sup>**

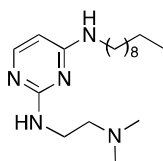

To a solution of 2,4-dichloro-6-methylpyrimidine (0.65 g, 4.0 mmol) in THF (5 ml) was added decylamine (1.26g, 8 mmol, 2 eq). The resulting solution was stirred at 30 °C for 18 hours, filtered and concentrated *in vacuo*. The residue was purified by flash chromatography using 1:9 ethyl acetate:hexanes to yield a mixture of 2-chloro- $N$ -decylpyrimidin-4-amine and 2-chloro- $N$ -decylpyrimidin-4-amine. Isomers were separated by flash chromatography (EtOAc:Triethylamine, 95:5).

4-Chloro- $N$ -decylpyrimidin-2-amine : yield 967mg, 68%, mp 80-82°C;  $^1\text{H}$  NMR ( $\text{CDCl}_3$ ):  $\delta$  0.80 (t, 3H,  $J = 6.2$  Hz), 1.25 (s, 14H), 1.53 (m, 2H), 3.26 (m, 2H), 5.94 (br s, 1H), 6.18 (d, 1H,  $J = 5.9$  Hz), 7.90 (d, 1H,  $J = 5.6$  Hz);  $^{13}\text{C}$  NMR ( $\text{CDCl}_3$ ):  $\delta$  13.3, 21.9, 26.2, 28.4, 28.6, 28.8 (3 x C), 31.2, 40.9, 100.1 (br), 156.0 (br), 160.0, 163.3.

2-Chloro- $N$ -decylpyrimidin-4-amine: yield 384mg, 27%, mp 67-68°C;  $^1\text{H}$  NMR ( $\text{CDCl}_3$ ):  $\delta$  0.86 (t, 3H,  $J = 6.6$  Hz), 1.33 (s, 14H), 1.57 (m, 2H), 3.38 (q, 2H,  $J = 7$  Hz), 5.59 (br s, 1H), 6.48 (d, 1H,  $J = 5.3$  Hz), 8.09 (d, 1H,  $J = 5.3$  Hz);  $^{13}\text{C}$  NMR ( $\text{CDCl}_3$ ):  $\delta$  13.4, 22.0, 26.3, 28.6, 28.7, 28.9 (3 x C), 31.2, 40.9, 108.9, 159.3, 160.7, 162.0.

The target compound **40a** was synthesized using the general procedure as for **5a** from 4-chloro- $N$ -decylpyrimidin-2-amine and  $N,N$ -dimethylethylenediamine. The residue was purified by dry column flash chromatography using EtOAc followed by 1:1  $\text{CHCl}_3$ : $\text{CH}_3\text{OH}$  to yield the target compound.

**(40a)** Yield 300mg, 85% pale yellow oil;  $^1\text{H}$  NMR ( $\text{CDCl}_3$ ):  $\delta$  0.75 (t, 3H,  $J = 6.4$  Hz), 1.17 (s, 14H), 1.41 (m, 2H), 2.10 (s, 3H), 2.33 (t, 2H,  $J = 6.3$  Hz), 3.09 (q, 2H,  $J = 5.9$  Hz), 3.27 (t, 2H,  $J = 6.3$  Hz), 4.39 (br s, 1H), 5.29 (s, 1H), 5.53 (d, 1H,  $J = 5.9$  Hz), 7.60 (d, 1H,  $J = 5.9$  Hz);  $^{13}\text{C}$  NMR ( $\text{CDCl}_3$ ):  $\delta$  13.3, 21.9, 26.3, 28.5, 28.6, 28.8 (2 x C), 28.9, 31.1, 38.3, 40.5, 44.5, 57.8, 93.5 (br), 154.5 (br), 161.3, 162.6; HRMS calculated for  $\text{C}_{18}\text{H}_{35}\text{N}_5$ , 321.2892; found 321.2883.

**$N^2$ -Decyl- $N^4$ -(2-dimethylaminoethyl)pyrimidine-2,4-diamine (40b)**

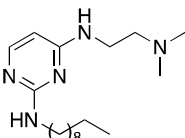

Synthesized using the general procedure as for **5b** from 2-chloro- $N$ -decylpyrimidin-4-amine and  $N,N$ -dimethylethylenediamine. The residue was purified by dry column flash chromatography using EtOAc followed by 1:1  $\text{CHCl}_3$ : $\text{CH}_3\text{OH}$  to yield the target compound.

**(40a)** Yield 238 mg, 79% pale yellow oil;  $^1\text{H}$  NMR ( $\text{CDCl}_3$ ):  $\delta$  0.72 (t, 3H,  $J = 7.0$  Hz), 1.15 (s, 14H), 1.50 (m, 2H), 2.08 (s, 6H), 2.31 (t, 3H,  $J = 6.1$  Hz), 3.21 (m, 4H), 5.48 (d, 1H,  $J = 5.8$  Hz), 5.63 (br s, 1H), 7.57 (d, 1H,  $J = 5.7$  Hz);  $^{13}\text{C}$  NMR ( $\text{CDCl}_3$ ):  $\delta$  13.3, 21.9, 26.3, 28.7, 28.8, 28.9 (2 x C), 29.2, 31.1, 37.6, 40.6, 44.4, 57.4, 93.7 (br), 154.3, 161.5, 162.5 (br); HRMS calculated for  $\text{C}_{18}\text{H}_{35}\text{N}_5$ , 321.2892; found 321.2899.

**$N^4$ -Dodecyl- $N^2$ -(2-dimethylaminoethyl)pyrimidine-2,4-diamine (41a) <sup>S8</sup>**

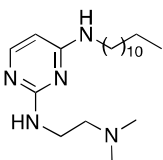

Synthesized using the general procedure as for **5a** from 4-chloro- $N$ -dodecylpyrimidin-2-amine and  $N,N$ -dimethylethylenediamine. The residue was purified by dry column flash chromatography using EtOAc followed by 1:1  $\text{CHCl}_3$ : $\text{CH}_3\text{OH}$  to yield the target compound.

**(41a)** Yield 226 mg, 65%, mp 36–38° C; <sup>1</sup>H NMR (CDCl<sub>3</sub>): δ 0.82 (t, 3H, *J* = 6.9 Hz), 1.32 (s, 18H), 1.49 (m, 2H), 2.18 (s, 6H), 2.42 (t, 2H, *J* = 6.2 Hz), 3.19 (q, 2H, *J* = 6.1 Hz), 3.38 (t, 2H, *J* = 6.2 Hz), 5.13 (br s, 1H), 5.48 (br s, 1H), 5.63 (d, 1H, *J* = 5.9 Hz), 7.68 (d, 1H, *J* = 5.9 Hz); <sup>13</sup>C NMR (CDCl<sub>3</sub>): δ 13.4, 22.0, 26.3, 28.6, 28.7, 28.9 (3 x C), 29.0, 31.2, 38.3, 40.6, 44.6, 57.9, 93.6 (br), 154.2 (br), 161.1, 162.6; HRMS calculated for <sub>20</sub>H<sub>39</sub>N<sub>5</sub>, 349.3205; found 349.3210.

***N*<sup>2</sup>-Dodecyl-*N*<sup>4</sup>-(2-dimethylaminoethyl)-pyrimidine-2,4-diamine (41b)**

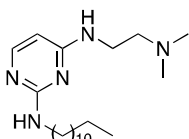

Synthesized using the general procedure as for **5b** from 2-chloro-*N*-dodecylpyrimidin-4-amine and *N,N*-dimethylethylenediamine. The residue was purified by dry column flash chromatography using EtOAc followed by 1:1 CHCl<sub>3</sub>:CH<sub>3</sub>OH to yield the target compound.

**(41b)** Yield 244 mg, 83% pale yellow oil; <sup>1</sup>H NMR (CDCl<sub>3</sub>): δ 0.80 (t, 3H, *J* = 6.2 Hz), 1.23 (s, 18H), 1.49 (m, 2H), 2.17 (s, 6H), 2.43 (t, 2H, *J* = 6.1 Hz), 3.32 (m, 4H), 5.64 (d, 1H, *J* = 6.1 Hz), 5.78 (br s, 1H), 7.57 (d, 1H, *J* = 5.9 Hz); <sup>13</sup>C NMR (CDCl<sub>3</sub>): δ 13.3, 21.9, 26.4, 28.6, 28.6, 28.7, 28.9 (3 x C), 29.1, 31.2, 37.7, 40.7, 44.4, 57.3, 94.2 (br), 151.3 (br), 160.2, 162.4 (br); HRMS calculated for <sub>20</sub>H<sub>39</sub>N<sub>5</sub>, 349.3205; found 349.3213.

***N*-Decyl-*N*<sup>4</sup>-(2-dimethylaminoethyl)-pyrimidine-4,6-diamine (42)**

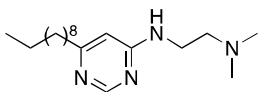

Synthesized using the general procedure as for **5a** from 6-chloro-*N*-decylpyrimidin-4-amine and *N,N*-dimethylethylenediamine. The residue was purified by dry column flash chromatography using EtOAc followed by 1:1 CHCl<sub>3</sub>:CH<sub>3</sub>OH to yield the target compound.

**(42)** yield 289 mg, 75%, mp 61–63° C; <sup>1</sup>H NMR (CDCl<sub>3</sub>): δ 0.63 (t, 3H, *J* = 6.6 Hz), 1.07 (s, 14H), 1.34 (m, 2H), 2.00 (s, 6H), 2.25 (t, 2H, *J* = 6.2 Hz), 2.88 (m, 2H), 3.16 (m, 2H), 5.01 (s, 1H), 5.67 (br s, 1H), 5.73 (br s, 1H), 7.78 (s, 1H); <sup>13</sup>C NMR (CDCl<sub>3</sub>): δ 13.2, 21.8, 26.3, 28.4, 28.5, 28.7, 28.8, 28.9, 31.0, 38.2, 40.9, 44.3, 57.2, 78.8 (br), 156.8, 162.2, 162.3; HRMS calculated for C<sub>18</sub>H<sub>35</sub>N<sub>5</sub>, 321.2892; found 321.2901

***N*-Dodecyl-*N*<sup>4</sup>-(2-dimethylaminoethyl)pyrimidine-4,6-diamine (43)**

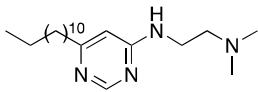

Synthesized using the general procedure as for **5** from 6-chloro-*N*-dodecylpyrimidin-4-amine and *N,N*-dimethylethylenediamine. The residue was purified by dry column flash chromatography using EtOAc followed by 1:1 CHCl<sub>3</sub>:CH<sub>3</sub>OH to yield the target compound.

**(43)** Yield 279 mg, 67%, mp 59–60° C; <sup>1</sup>H NMR (CDCl<sub>3</sub>): δ 0.71 (t, 3H, *J* = 7.0 Hz), 1.13 (s, 18H), 1.37 (m, 2H), 2.06 (s, 6H), 2.32 (t, 2H, *J* = 6.2 Hz), 2.94 (m, 2H), 3.12 (m, 2H), 5.06 (s, 1H), 5.54 (br s, 1H), 5.60 (br s, 1H), 7.83 (s, 1H); <sup>13</sup>C NMR (CDCl<sub>3</sub>): δ 13.2, 21.8, 26.3, 28.5 (2 x C), 28.6, 28.8 (2 x C), 28.9, 31.1, 38.2, 40.9, 44.3, 57.2, 78.9 (br), 156.9, 162.2, 162.3; HRMS calculated for C<sub>20</sub>H<sub>39</sub>N<sub>5</sub>, 349.3205; found 349.3216.

**References**

- S1. Sunley, R.; Snowling, G. Herbicidal pyrimidine derivatives. *Ger. Offen.* **1976** 52 pp.
- S2. Garner, J.; Hill, T.; Odell, L.; Keller, P.; Morgan, J.; McCluskey, A. Identification of aminopyrimidine regioisomers via line broadening effects in 1H and 13C NMR spectroscopy. *Aus. J. Chem.*, **2004**, 57, 1079–1083.
- S3. Winn, M.; Zydowsky, T. M.; Kerkman, D.; DeBernardis, J.; Rosenberg, S.; Shiosaki, K.; Basha, F.; A., T.; von Geldern, T.; Kester, J.; Boyd, S.; Yamamoto, D.; Fung, A. [[Tetrazolylbiphenyl)methyl]amino] pyridinecarboxylates as angiotensin II receptor antagonists. US **1993** 98 pp.
- S4. Marquais-Bienewald, S.; Hoelzl, W.; Preuss, A.; Mehlin, A. Synthesis of 2,4-bis(alkylamino)pyrimidines and their use as antimicrobials. *PCT Int. Appl* **2005** 38 pp.
- S5. McCluskey, A.; Keller, P. A.; Morgan, J.; Garner, J. Synthesis, molecular modeling and biological activity of methyl and thiomethyl substituted pyrimidines as corticotropin releasing hormone type 1 antagonists. *Org. Biomol. Chem.*, **2003**, 1, 3353–3361.
- S6. Copar, A.; Stanovnik, B.; Tisler, M. Study on the preparation of heteroaryl substituted enamines. A simple synthesis of heteroaryl substituted acetaldoximes from enamines. *J. Het. Chem.*, **1996**, 33, 465–474.
- S7. Curd, F. H. S.; Davis, M. I.; Owen, E. C.; Rose, F. L.; Yuey, G. A. P. Synthetic antimalarials. VI. Some 4-arylamino-2-aminoalkylamino-6-methylpyrimidines. *J. Chem. Soc.*, **1946**, 370–378.
- S8. Grier, N.; Chen, A.; Dulaney, E. L.; Dybas, R. A.; Strelitz, R. A.; Witzel, B. E.; Jakubowski, J. A.; Tefft, E. R.; Weber, G. A. n-Dodecyl-substituted aminopyrimidinium salt derivatives as paint film antifungal agents. *J. Coat. Tech.*, **1980**, 52, 57–62.



# Examples for NMR spectra

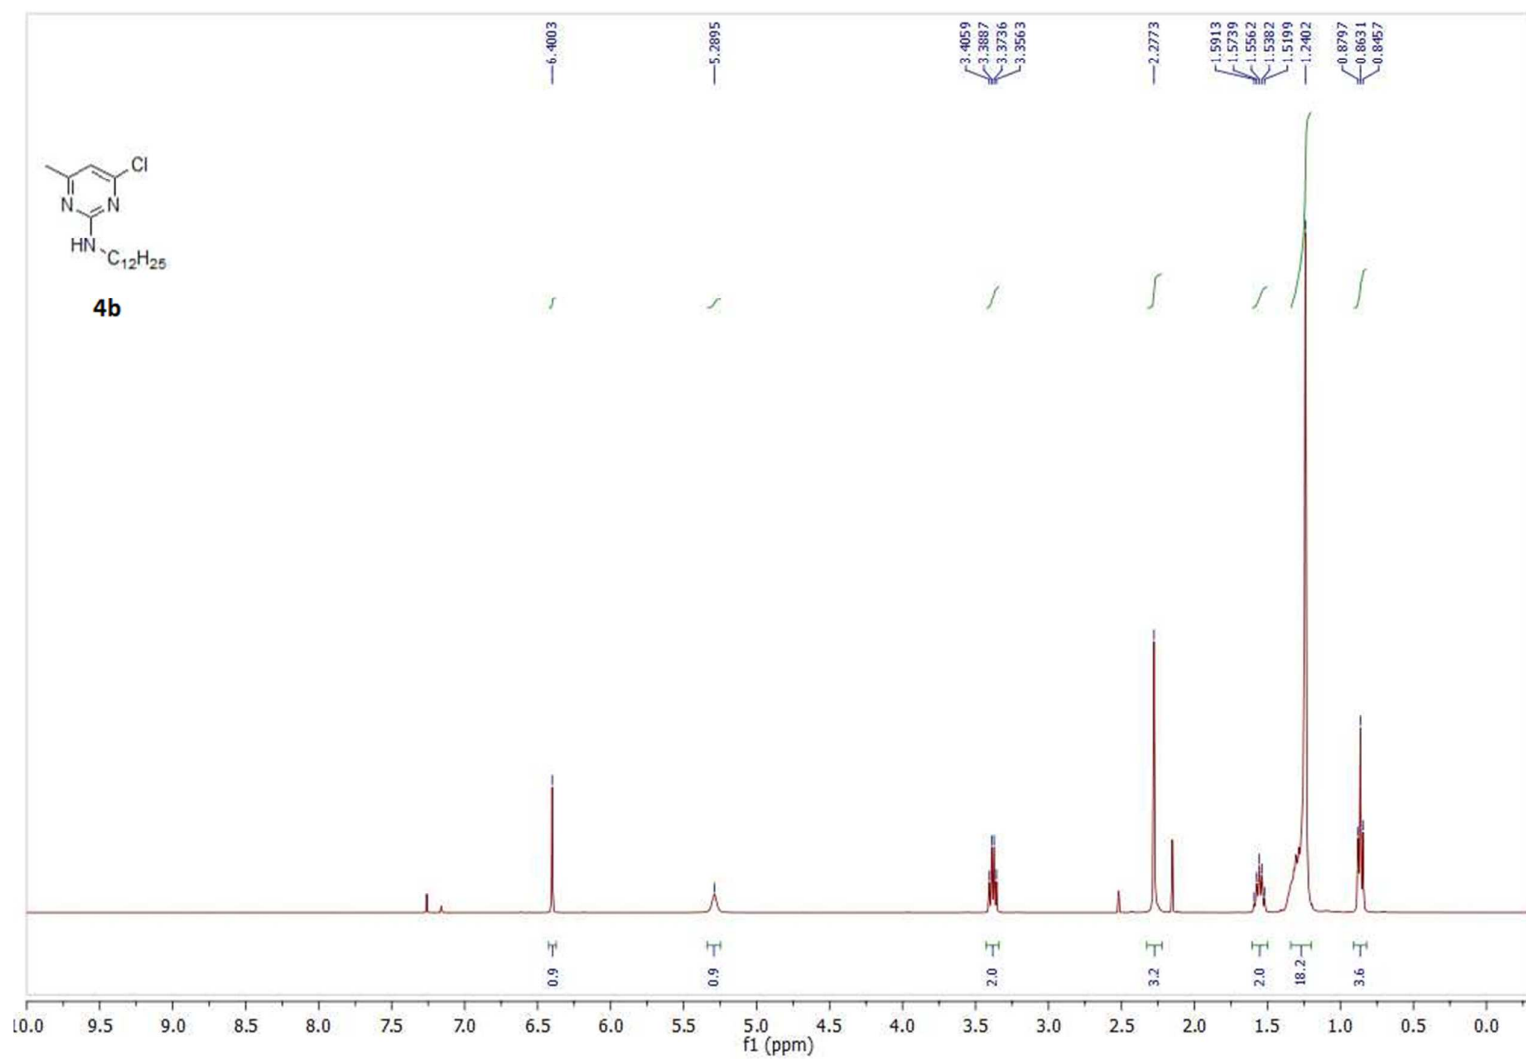

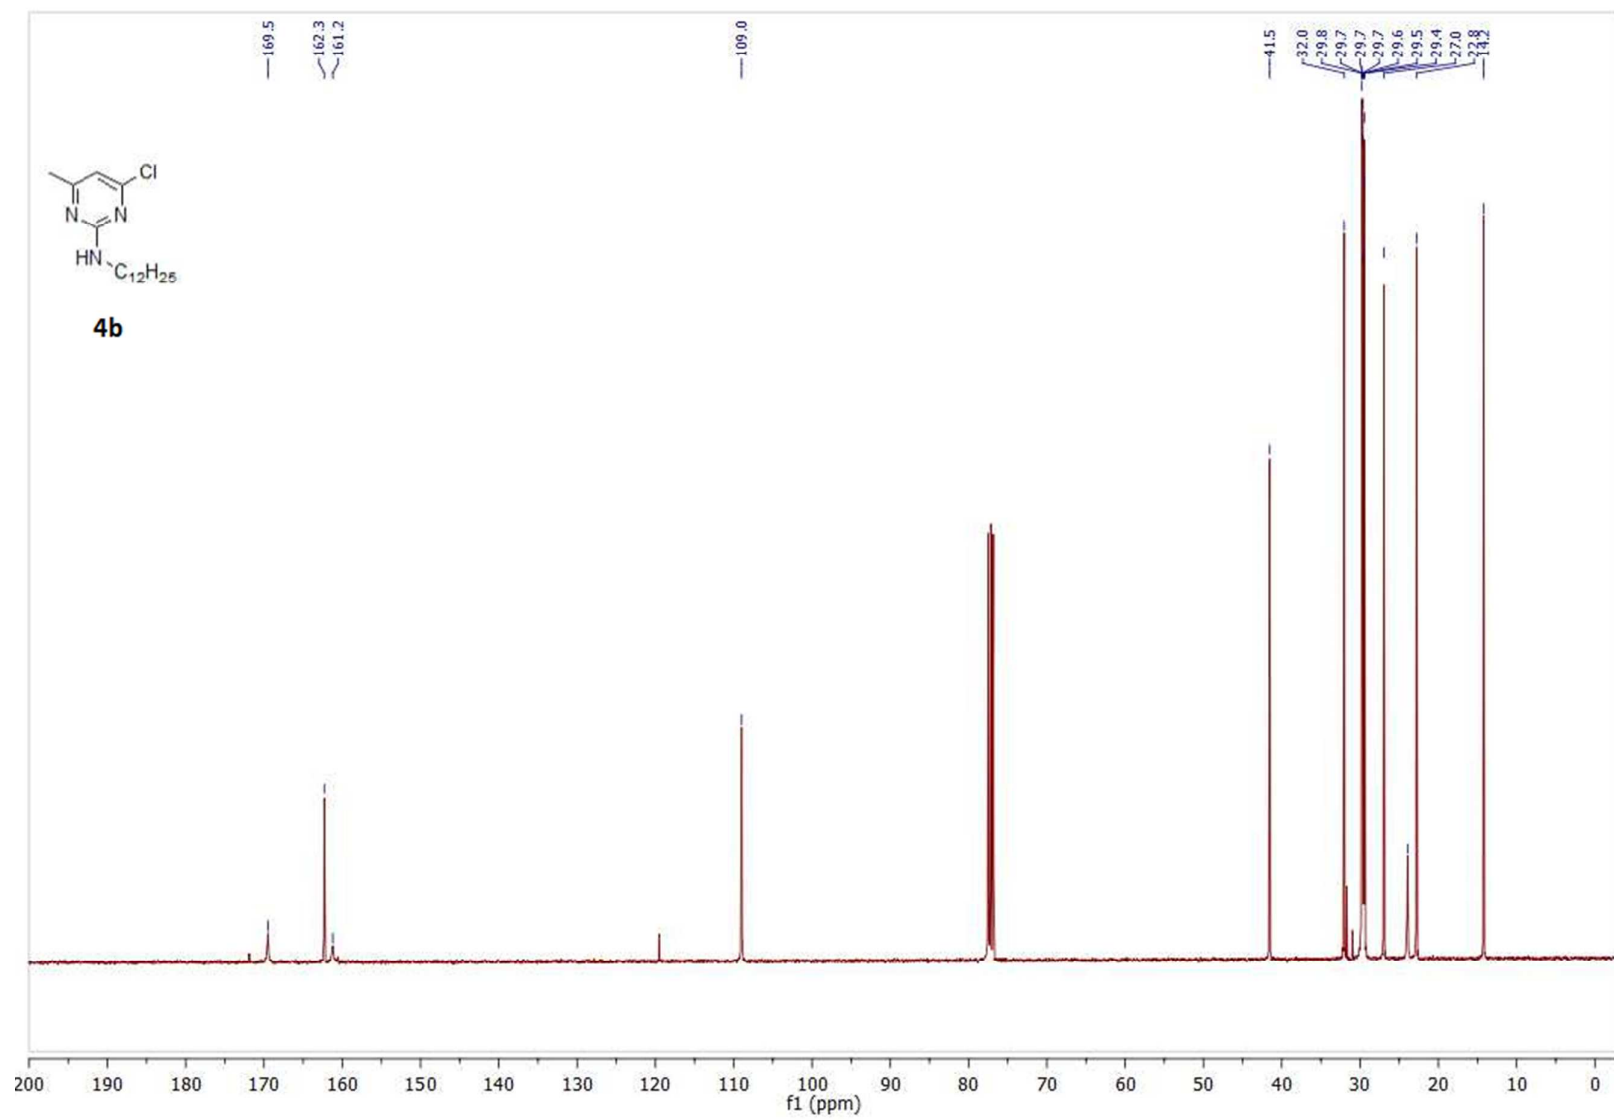

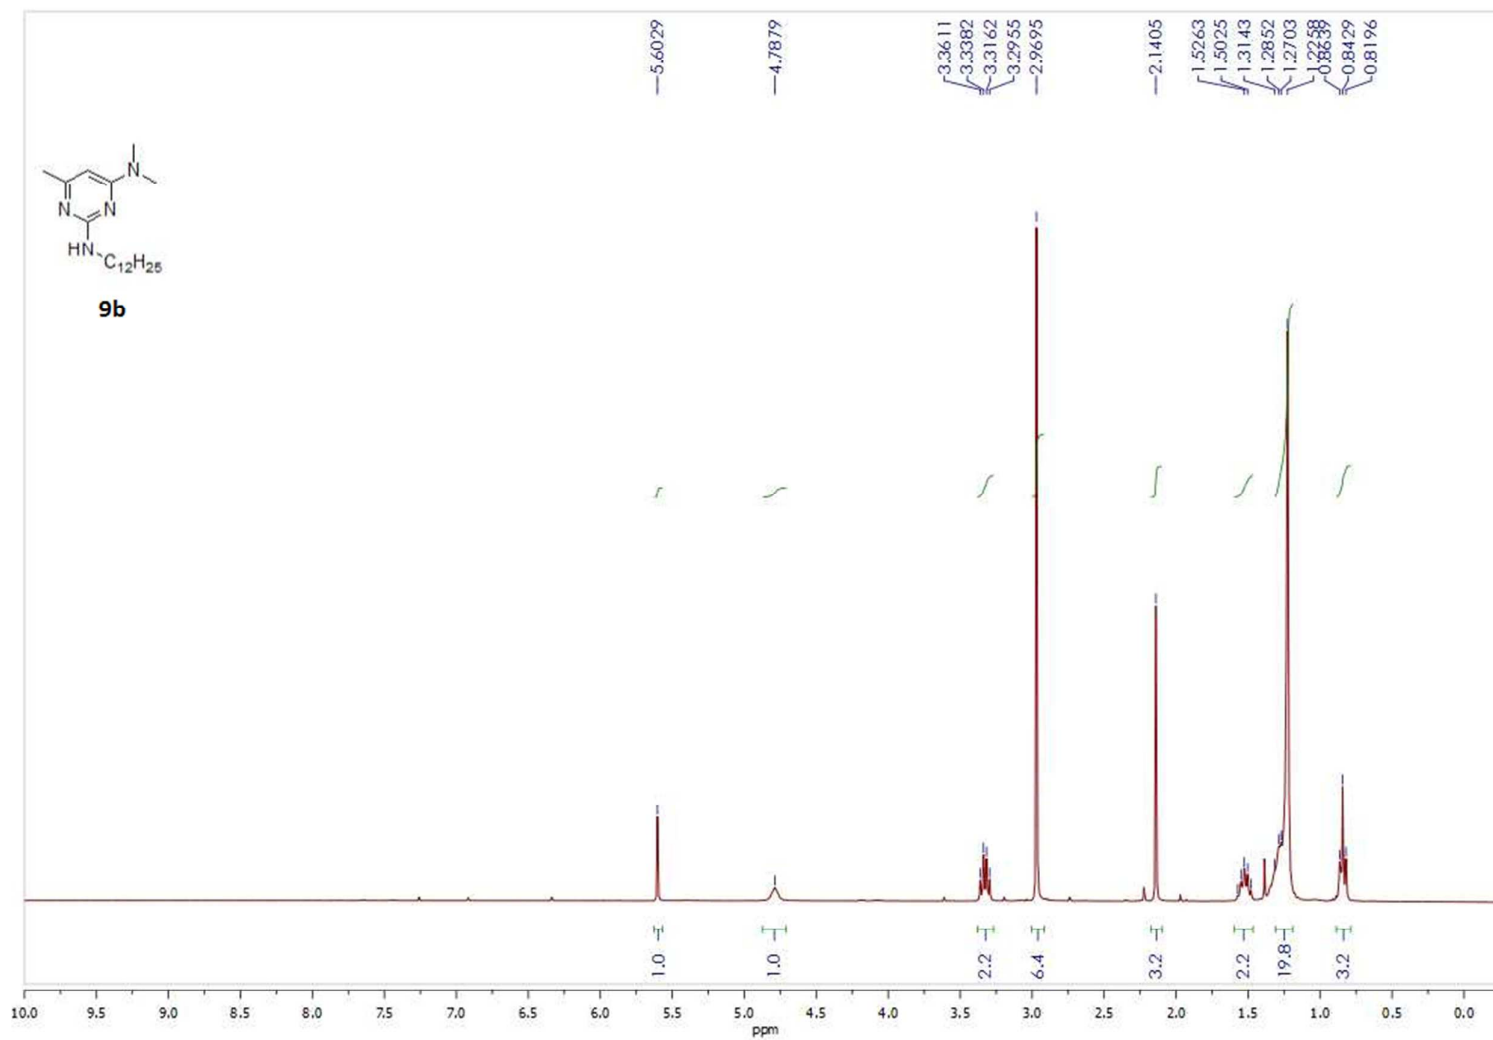

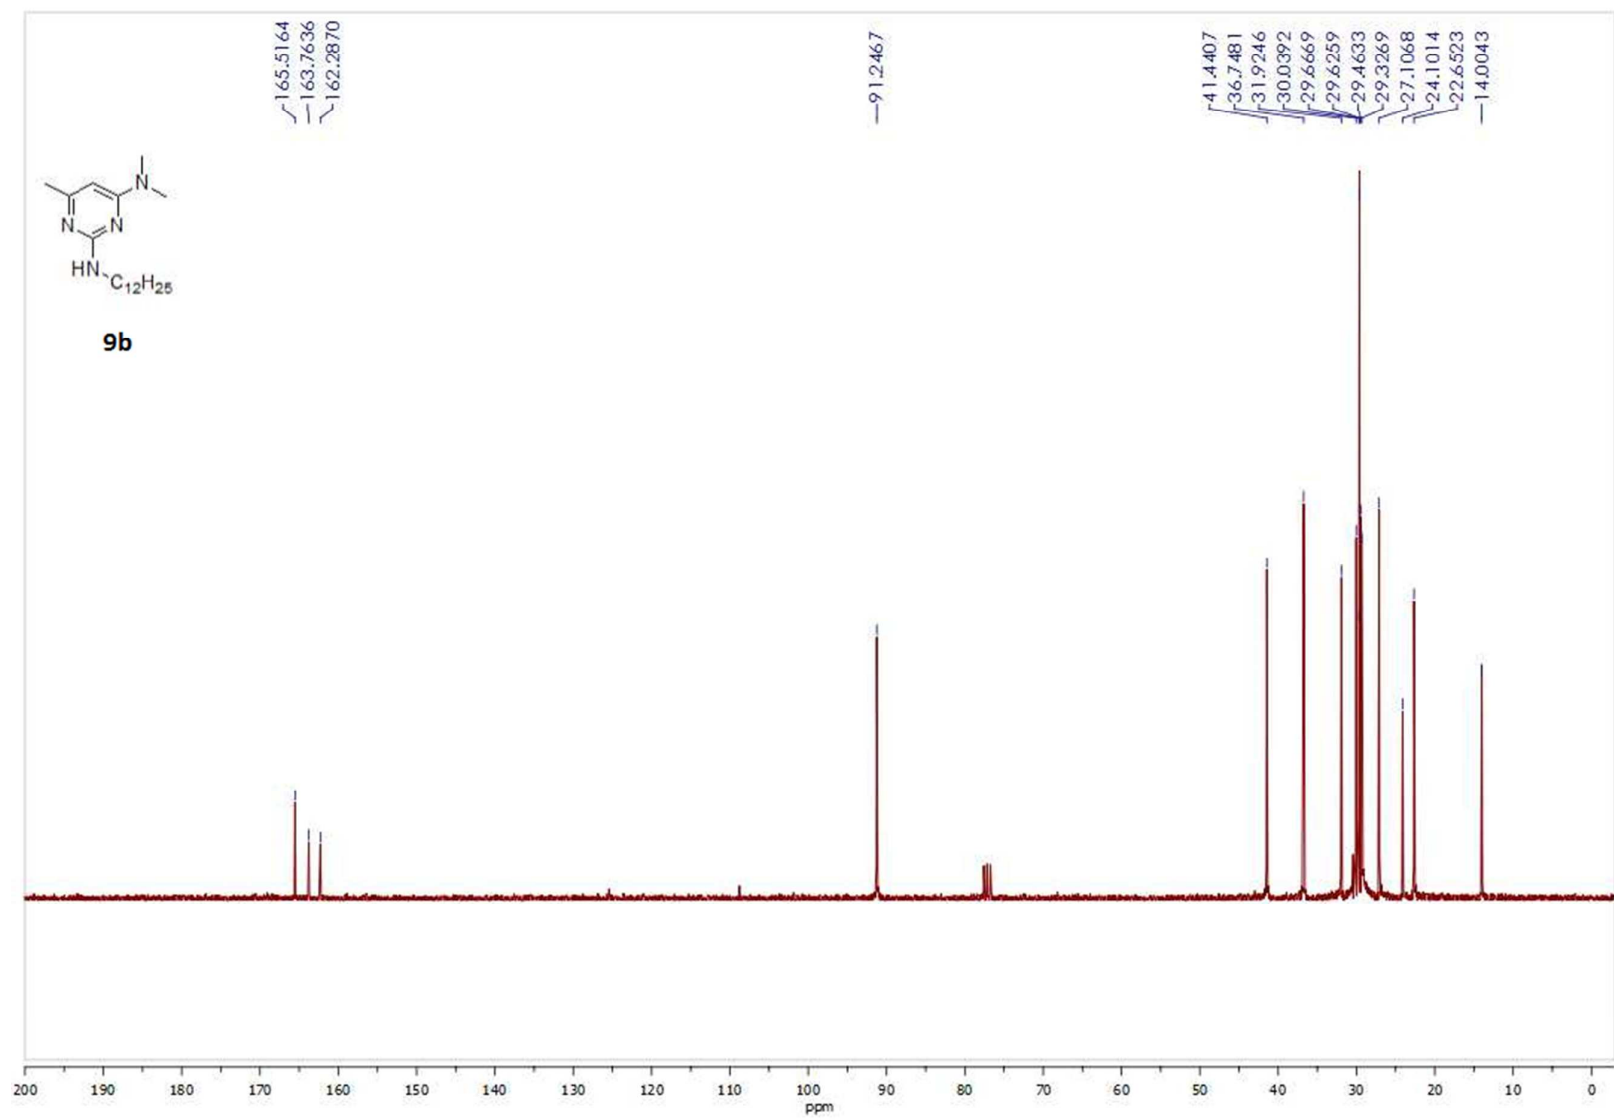

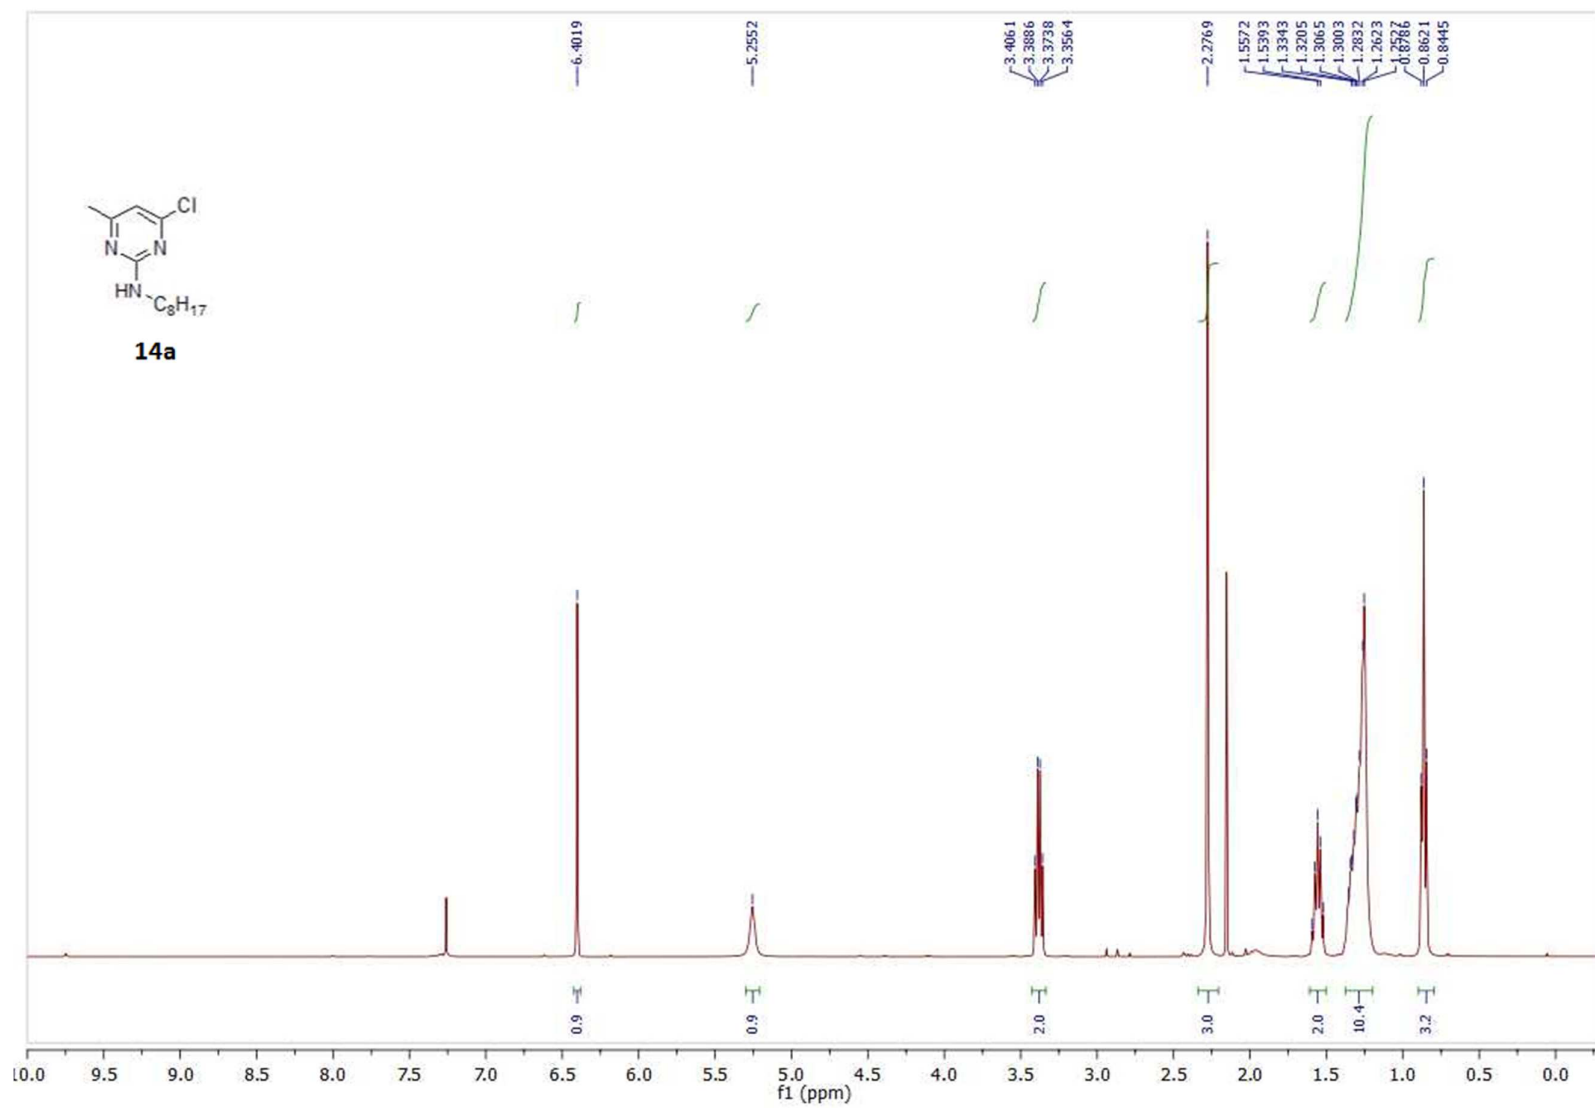

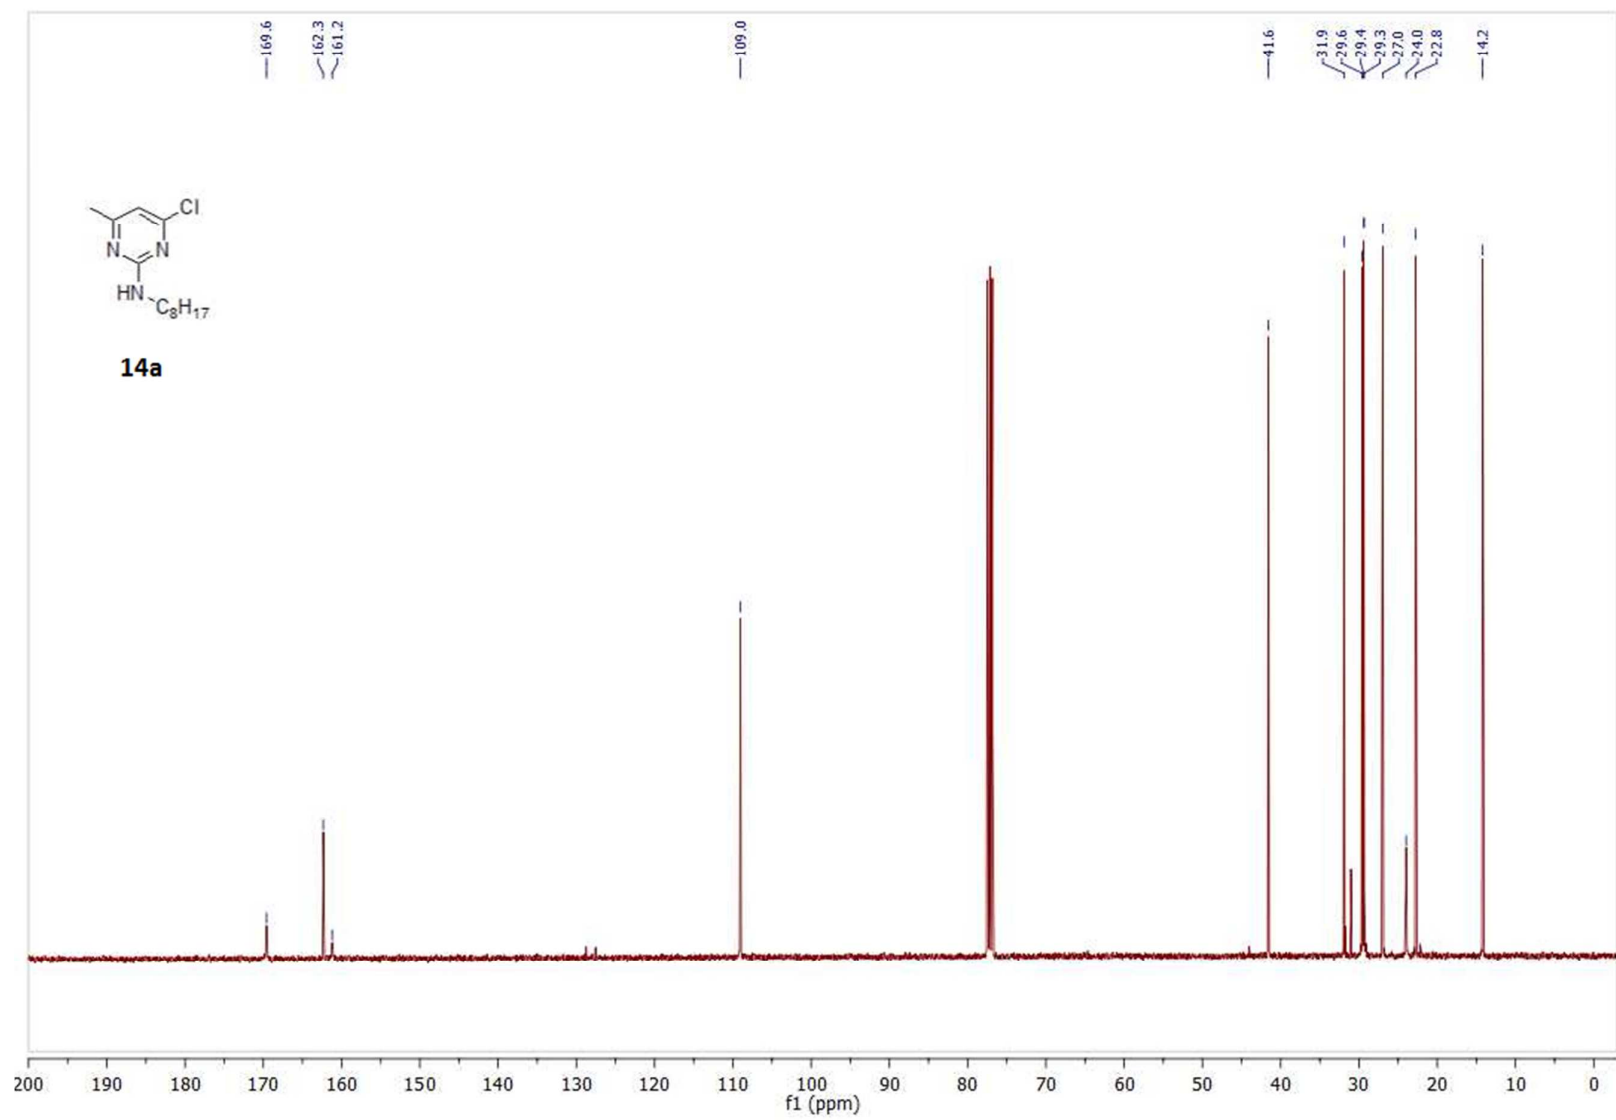

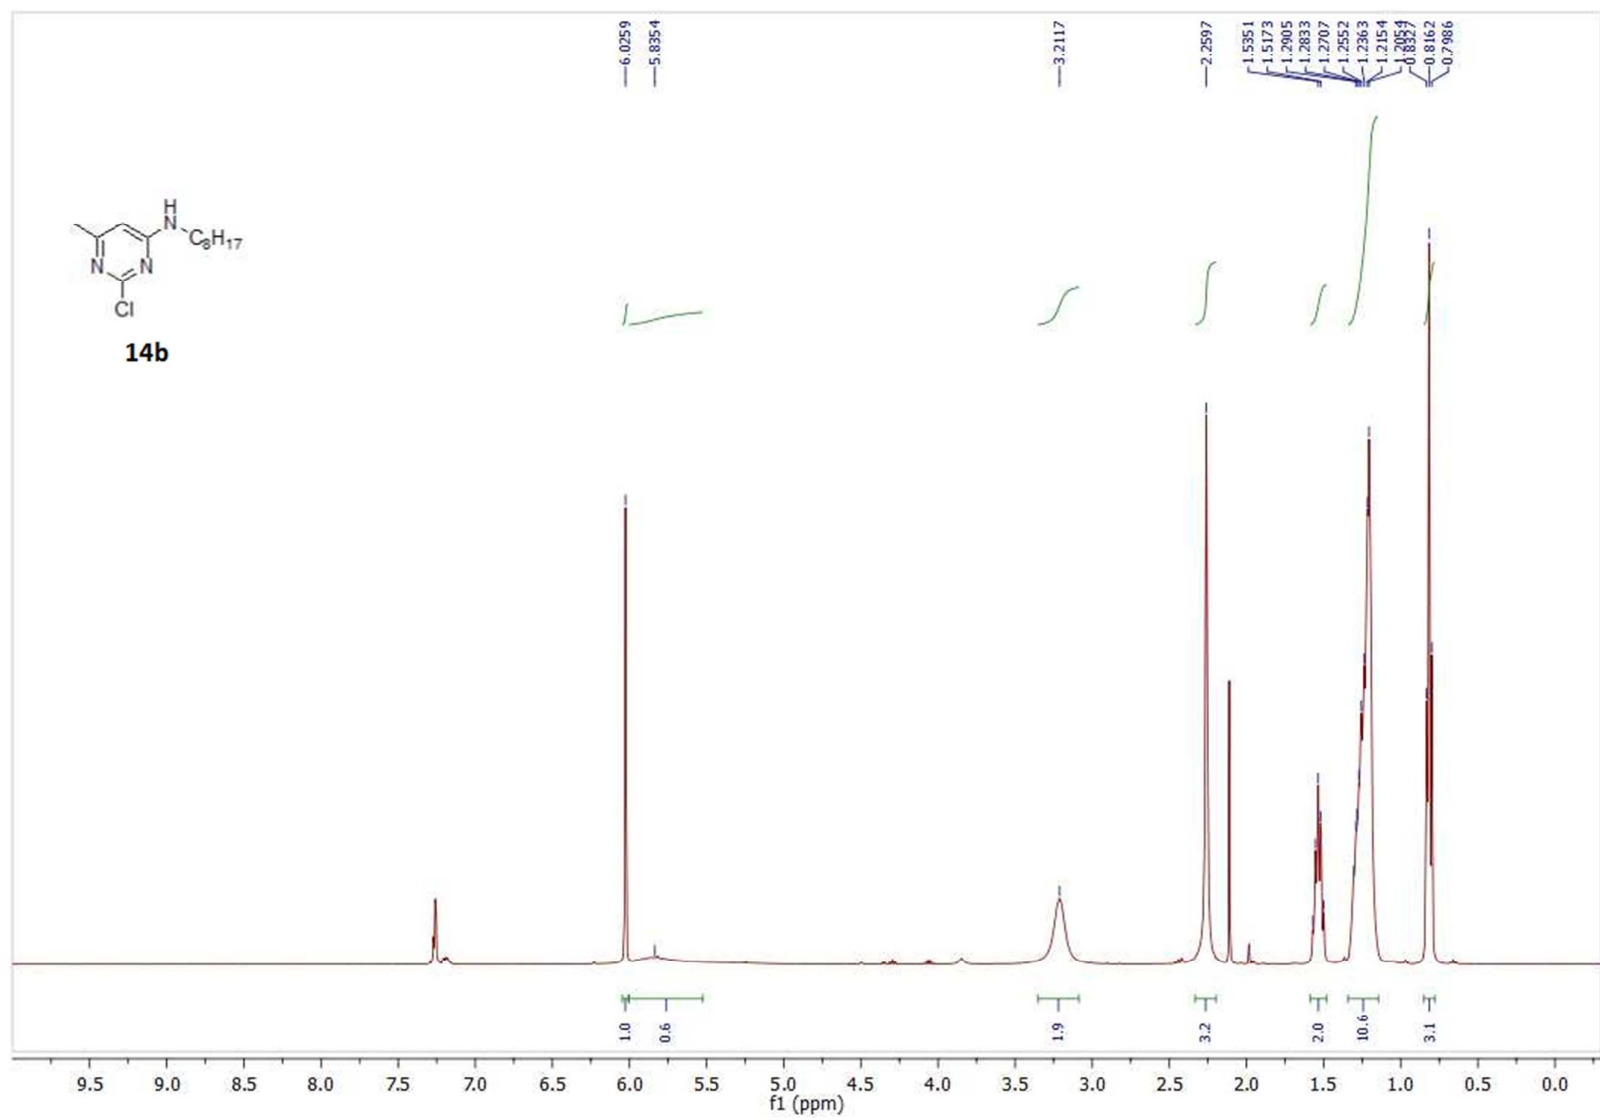

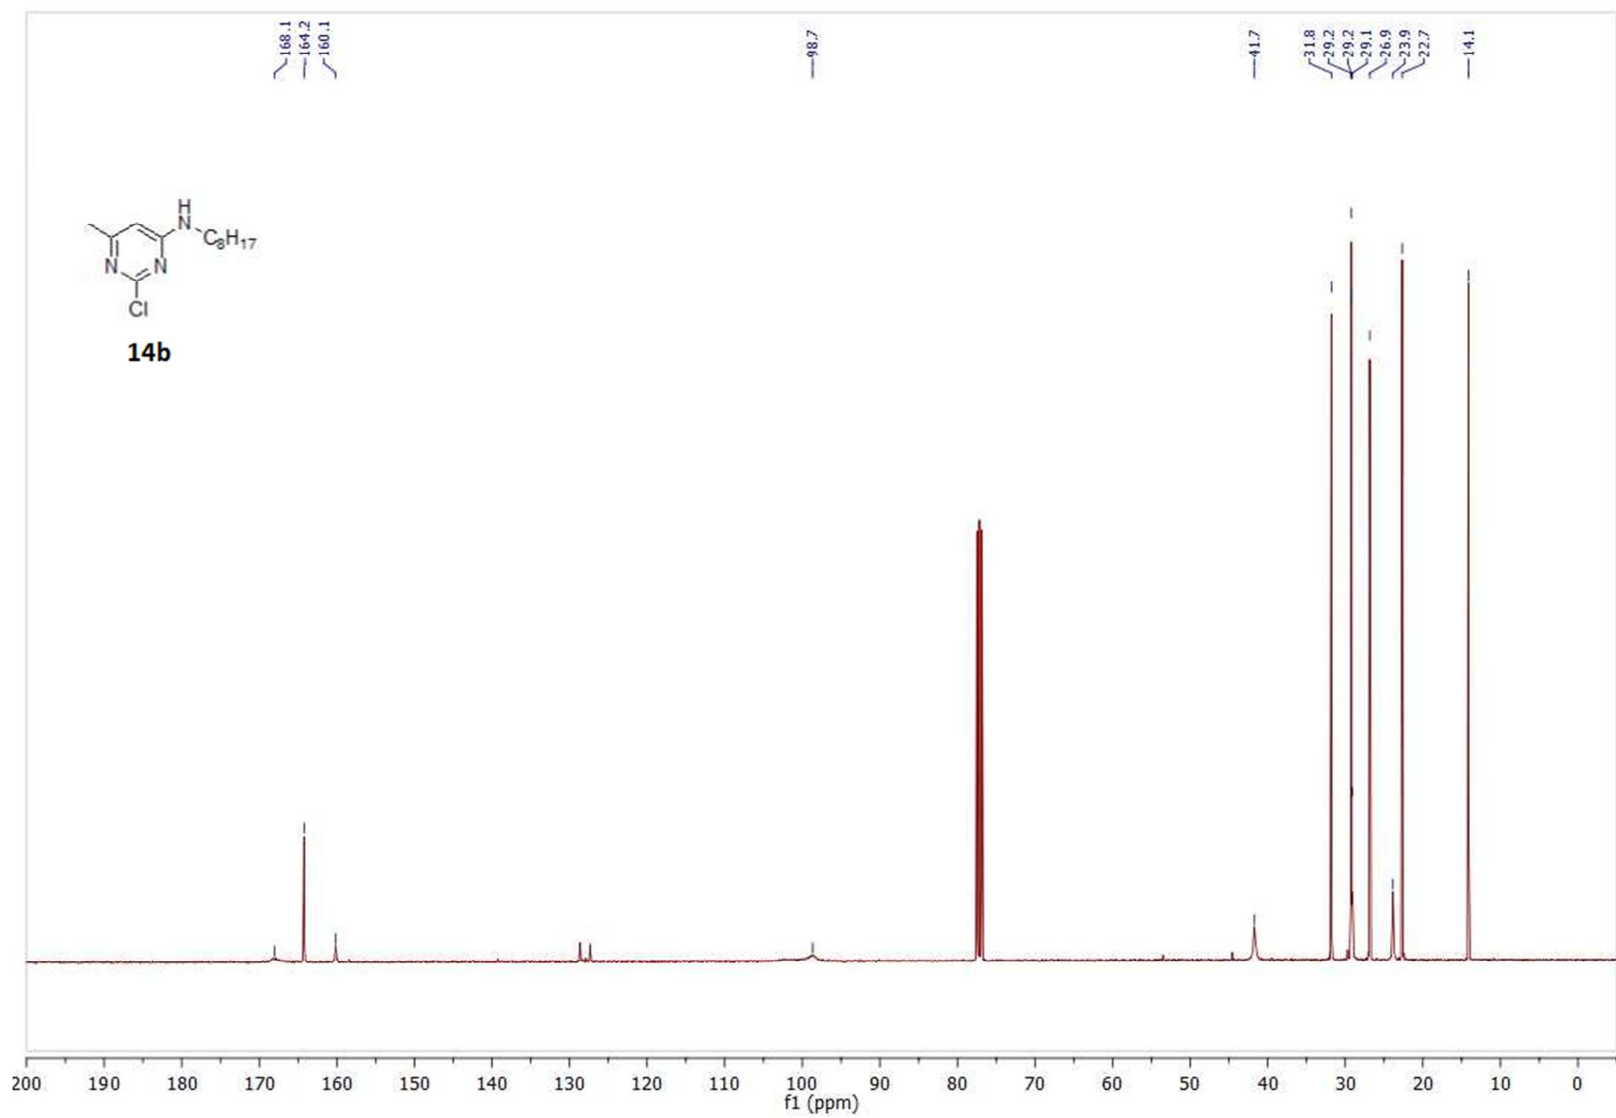



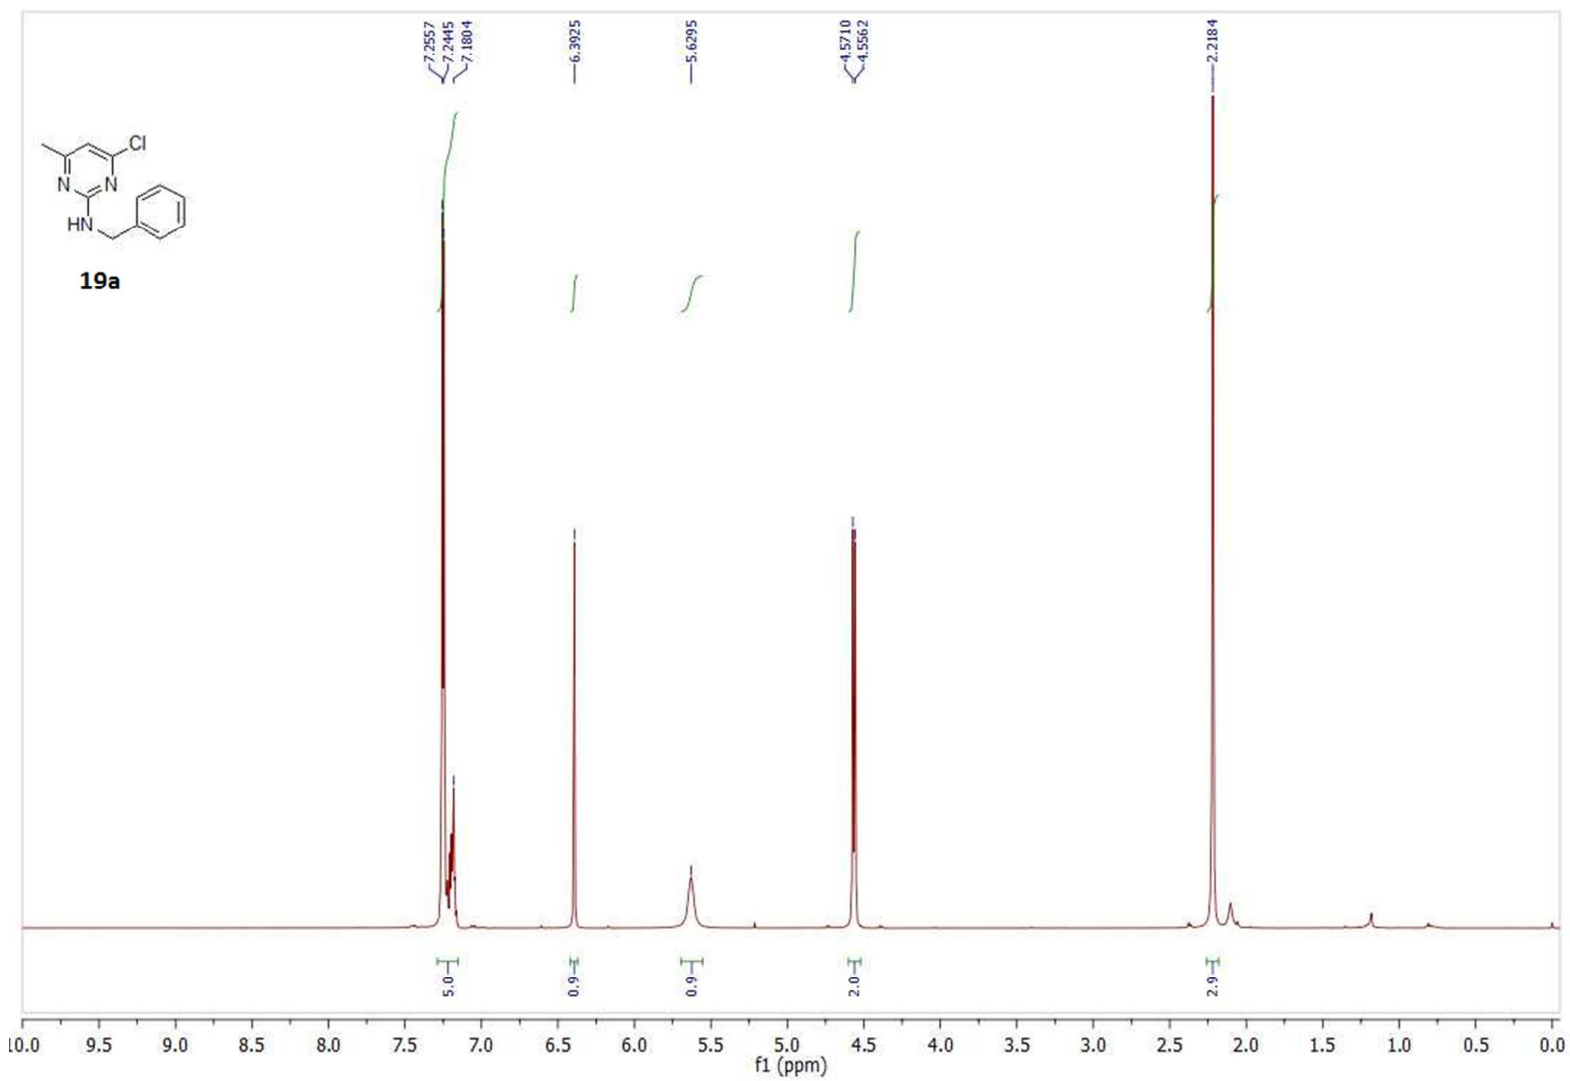

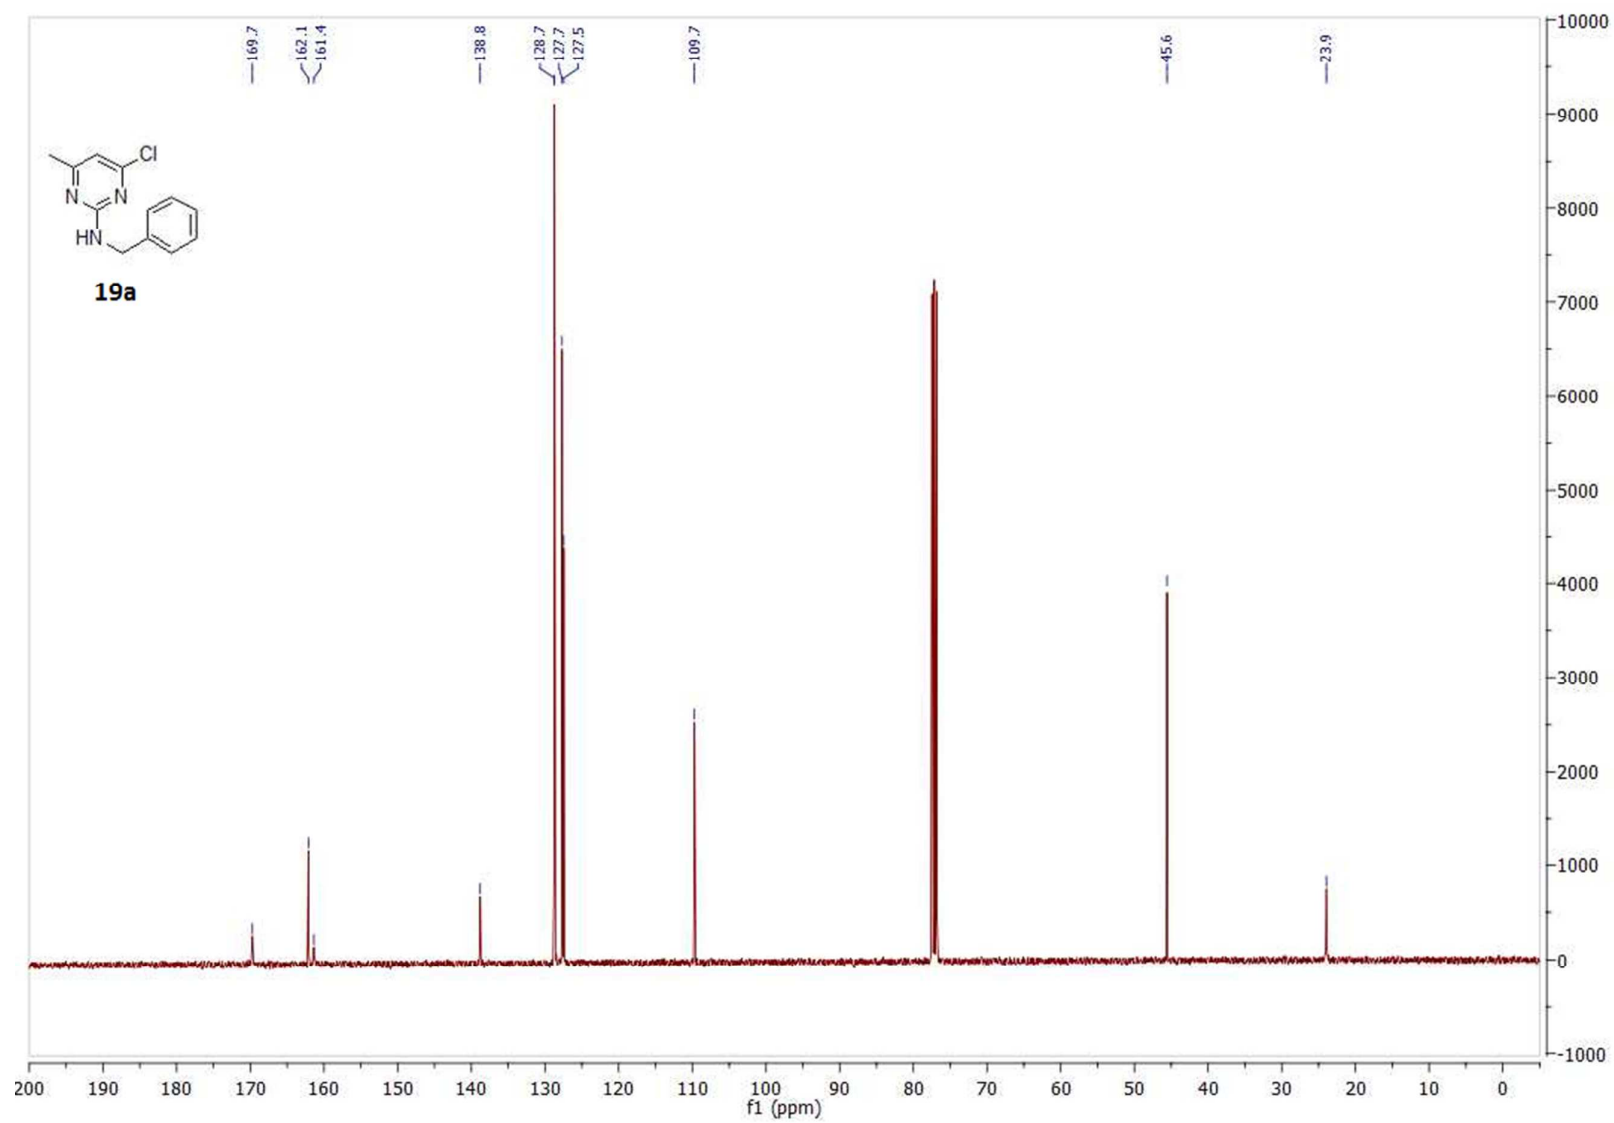

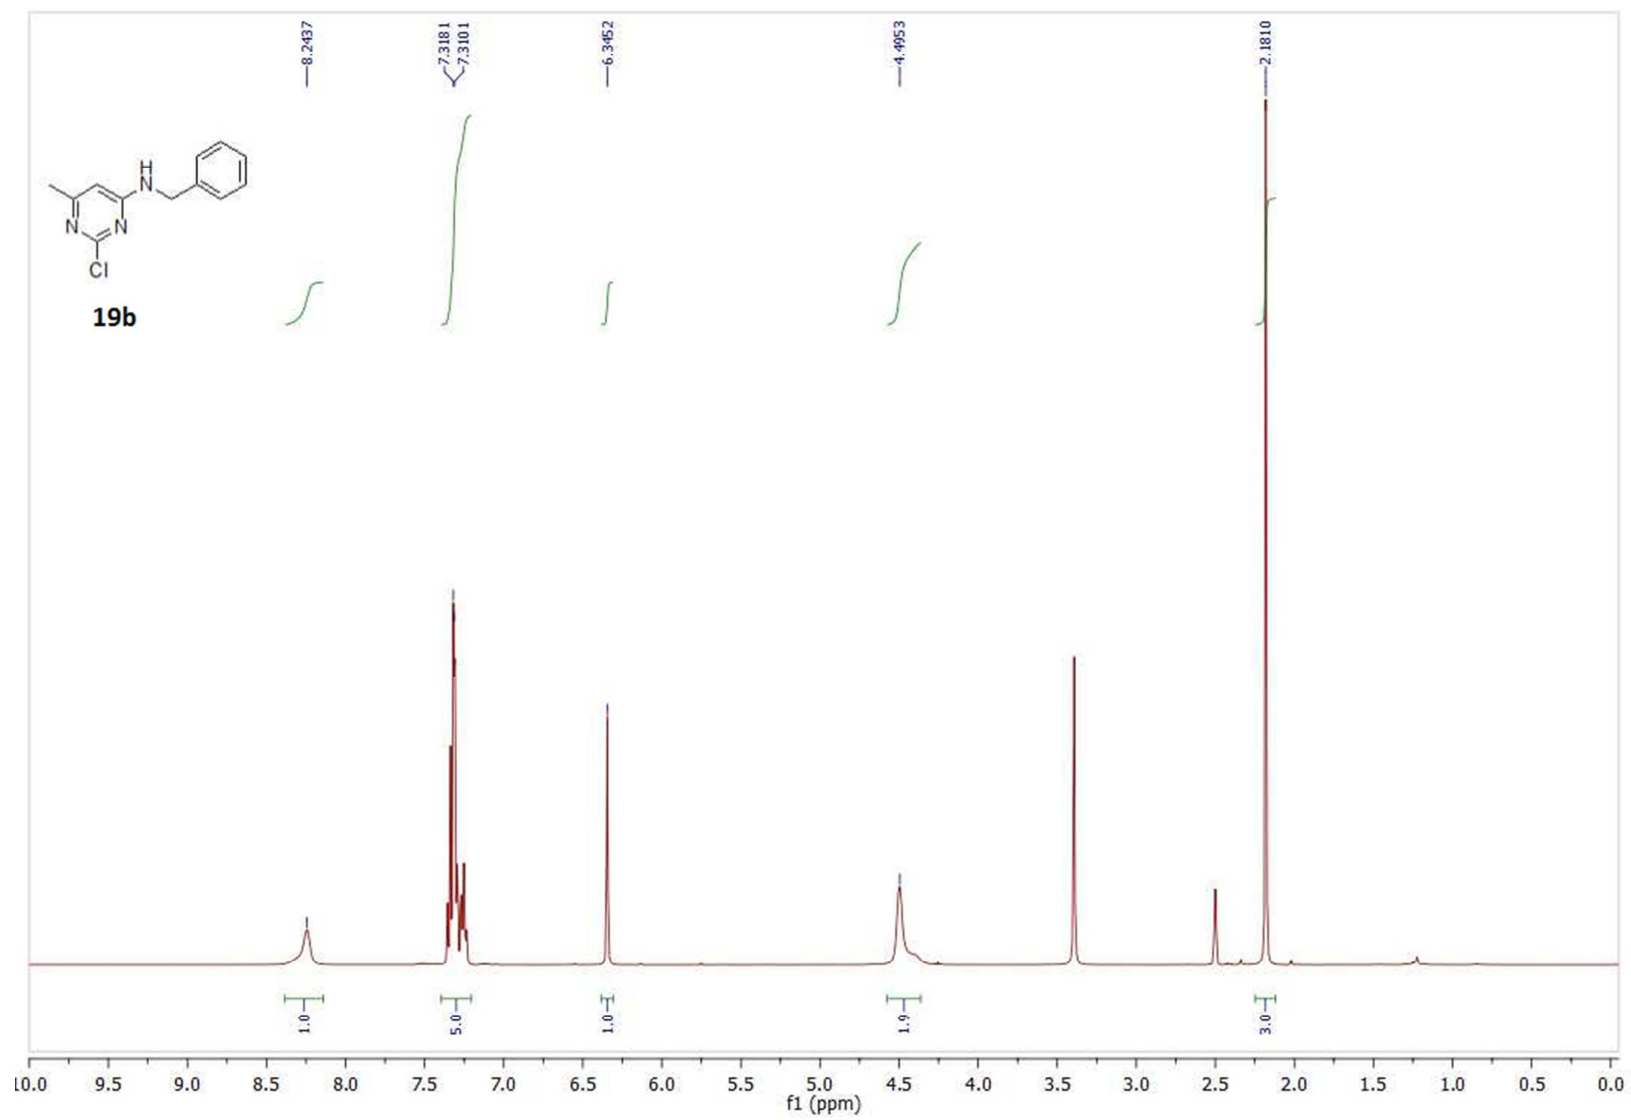

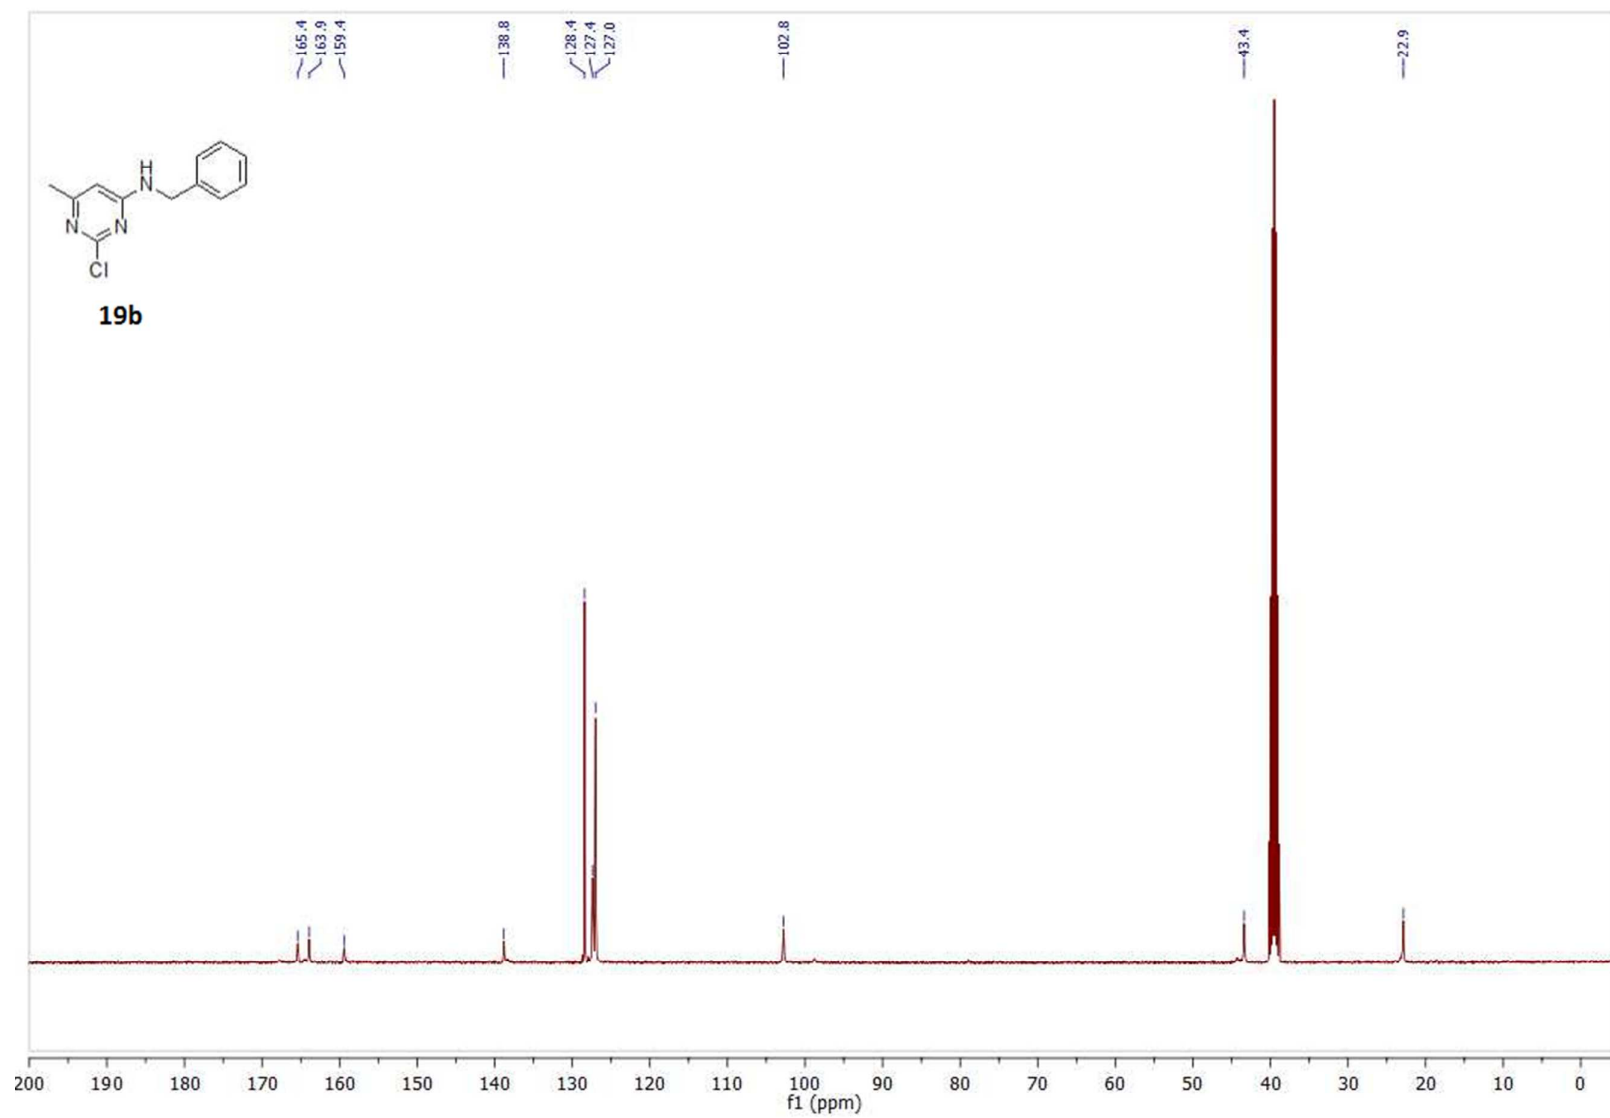

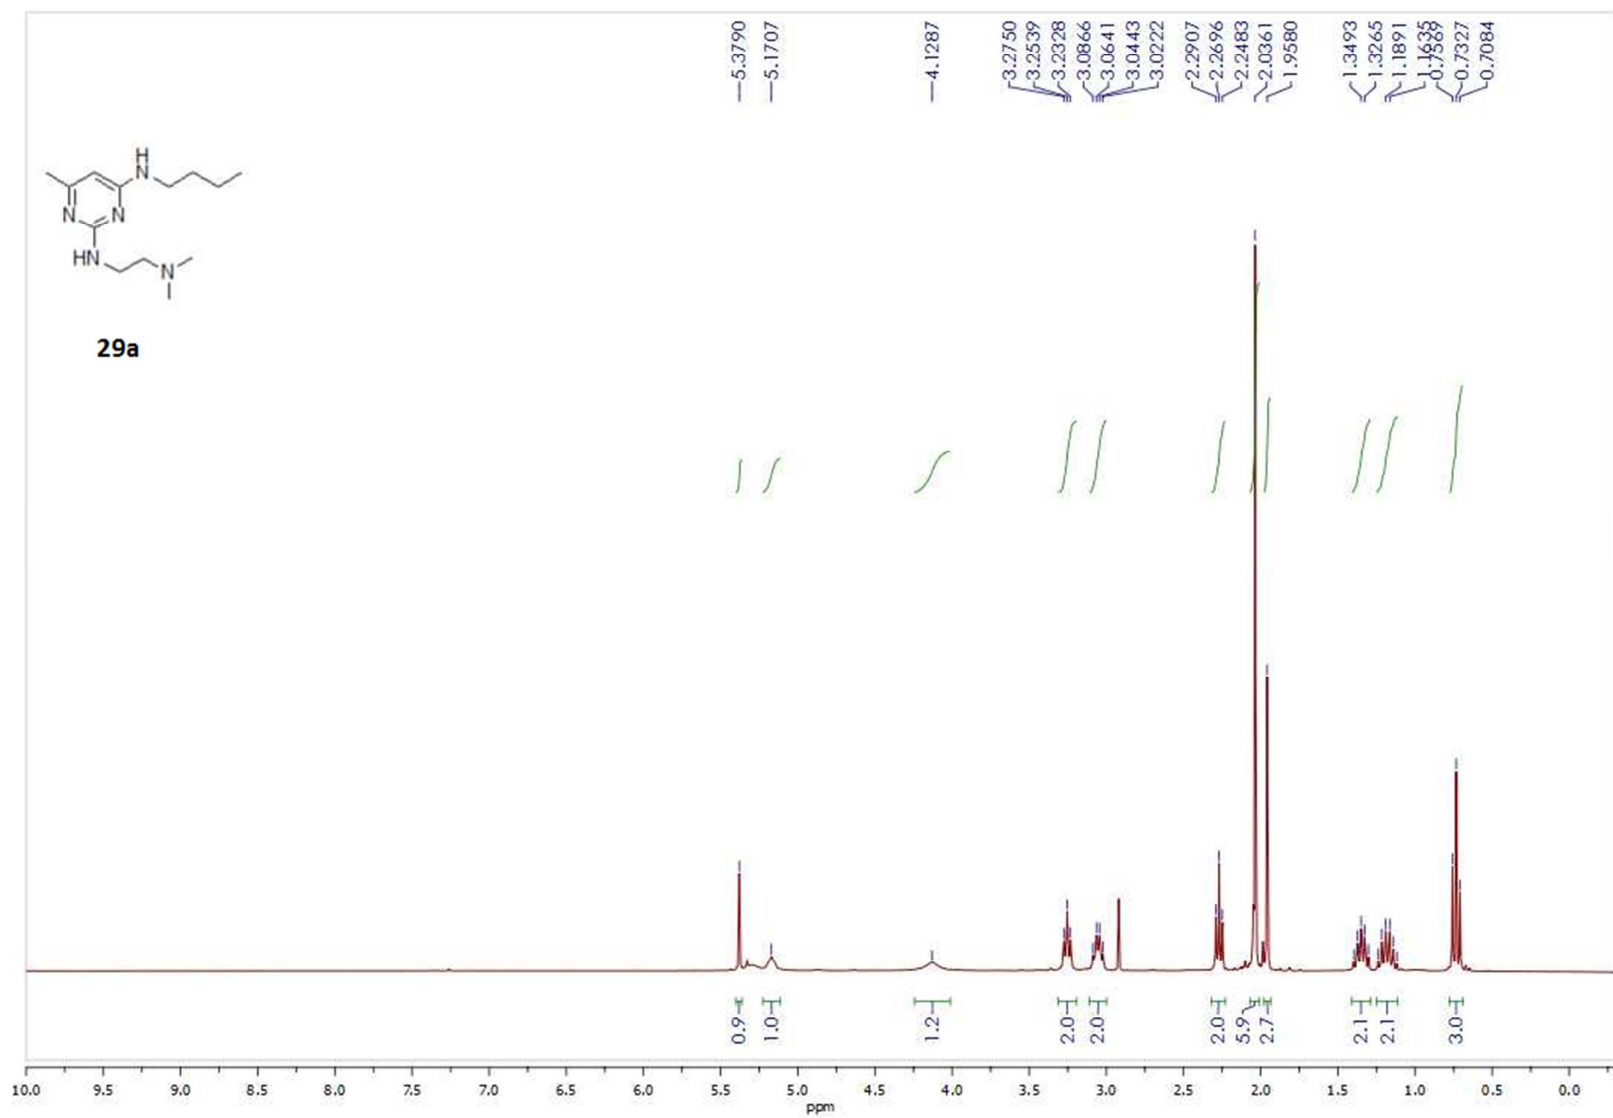

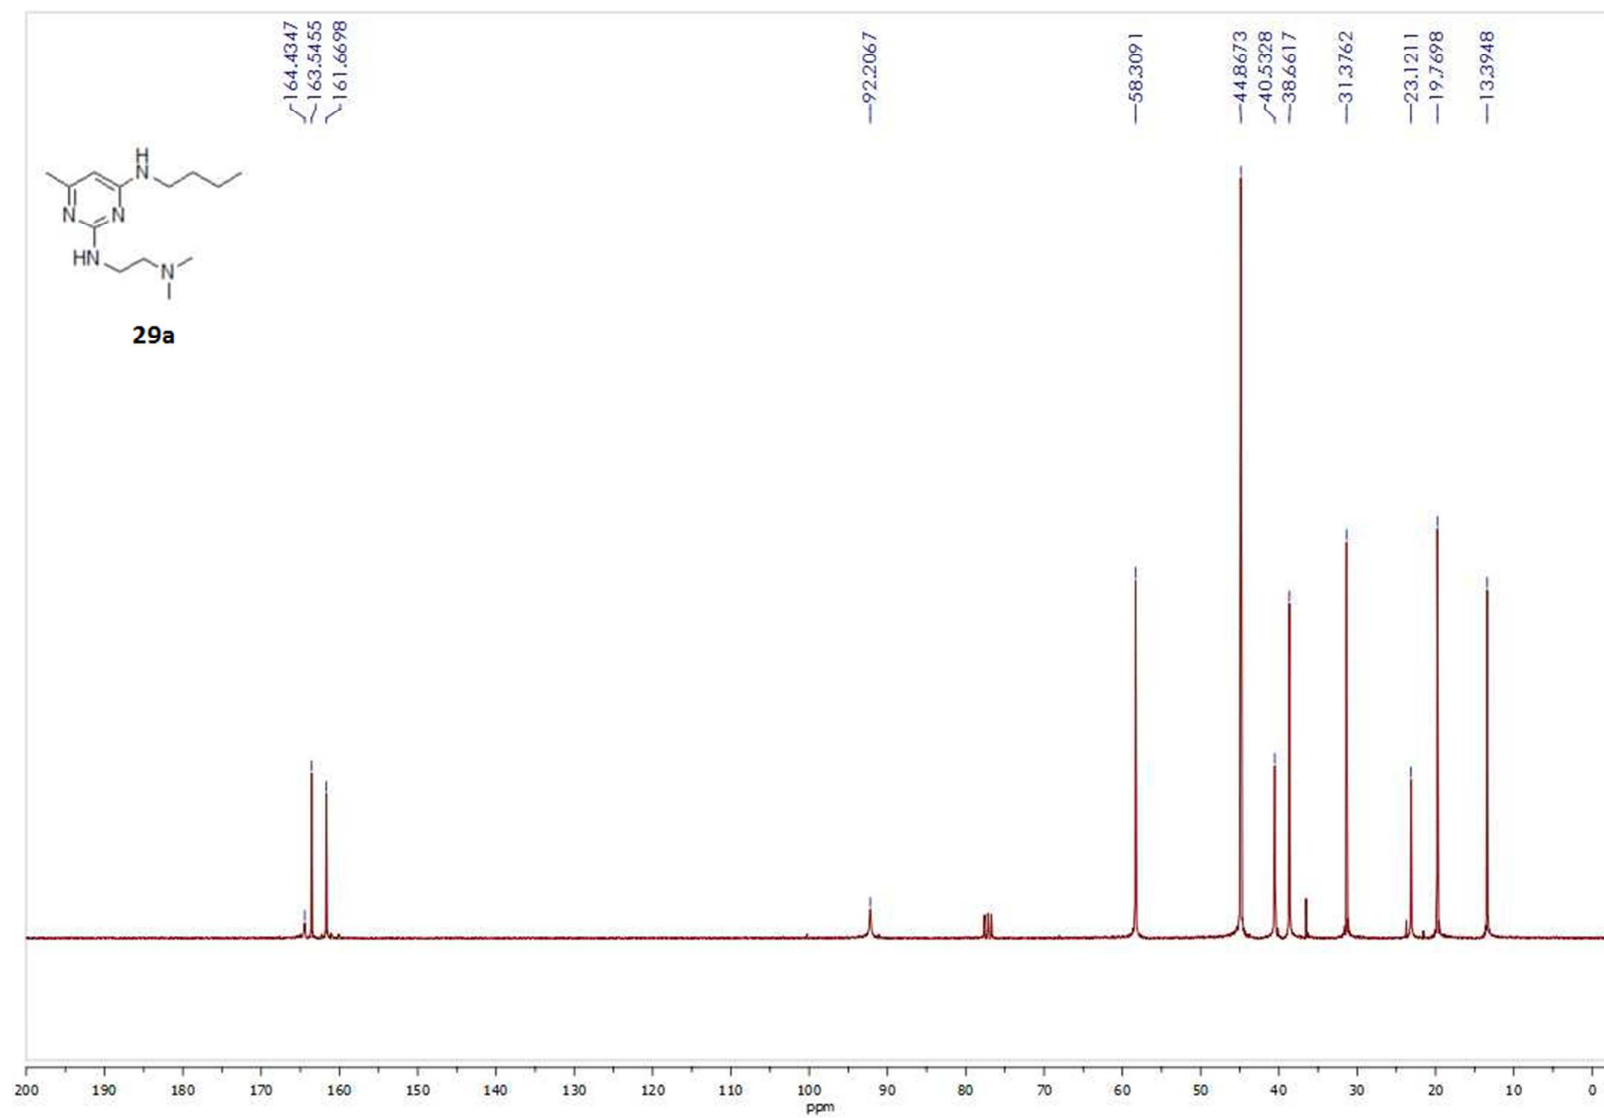

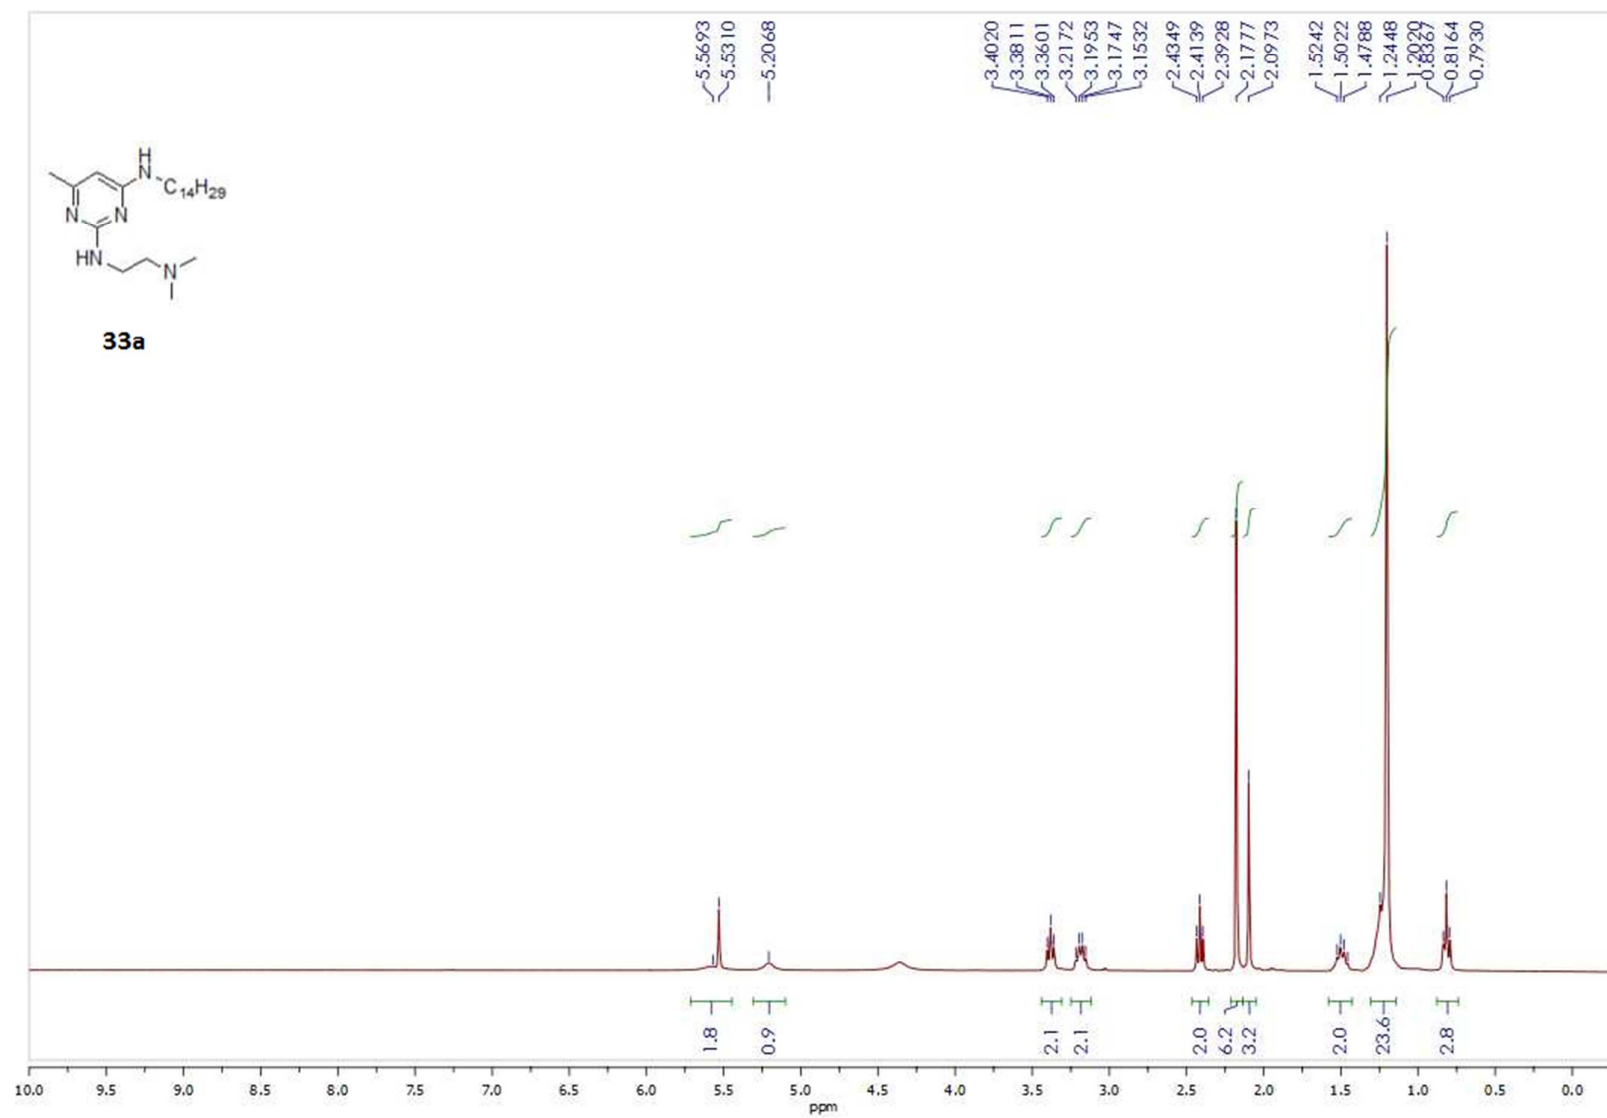

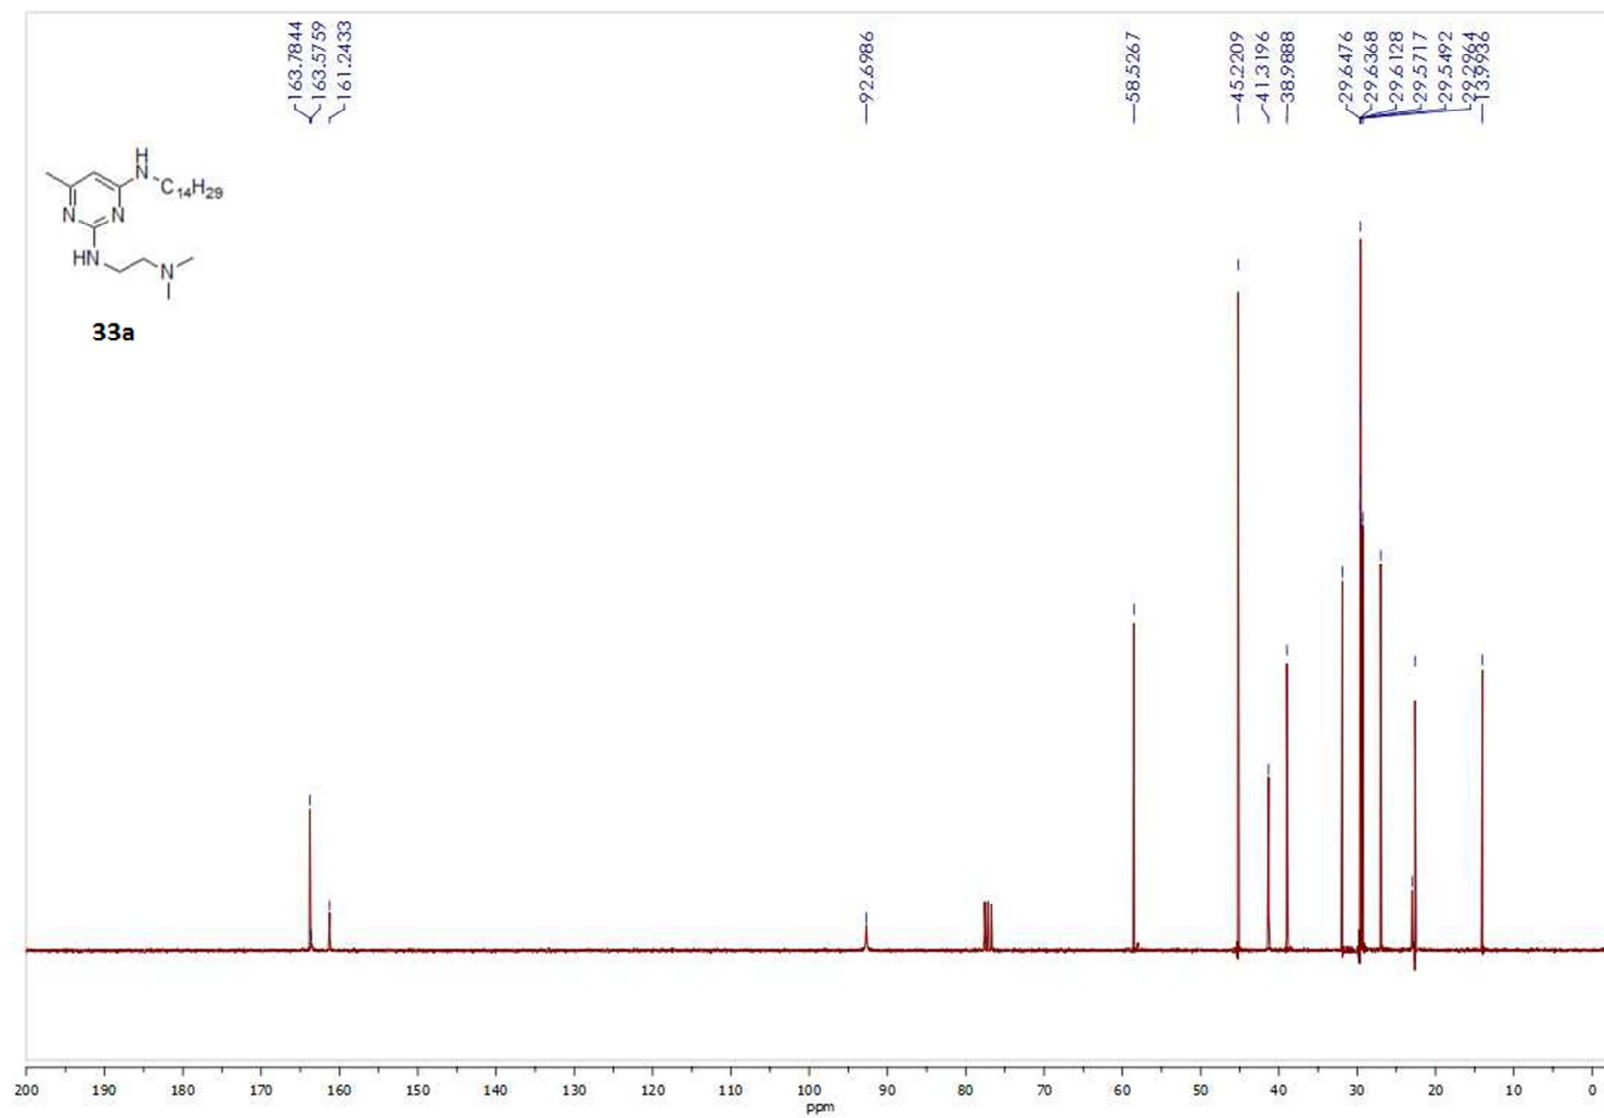



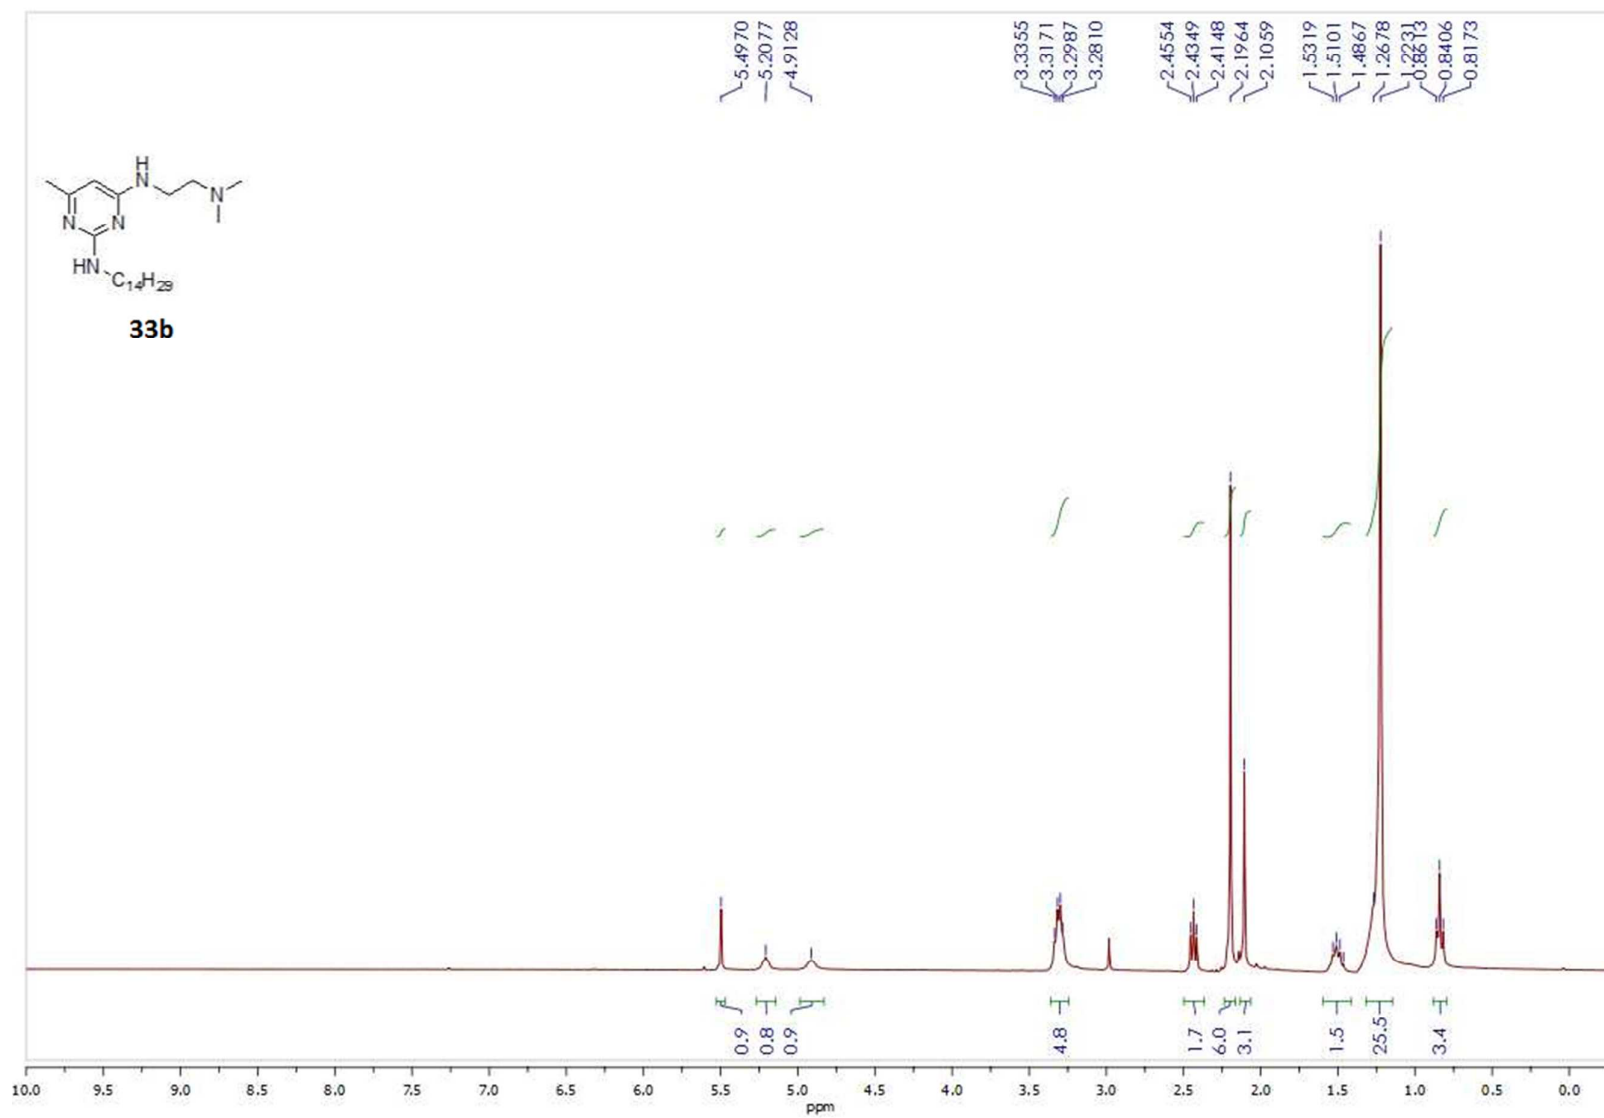

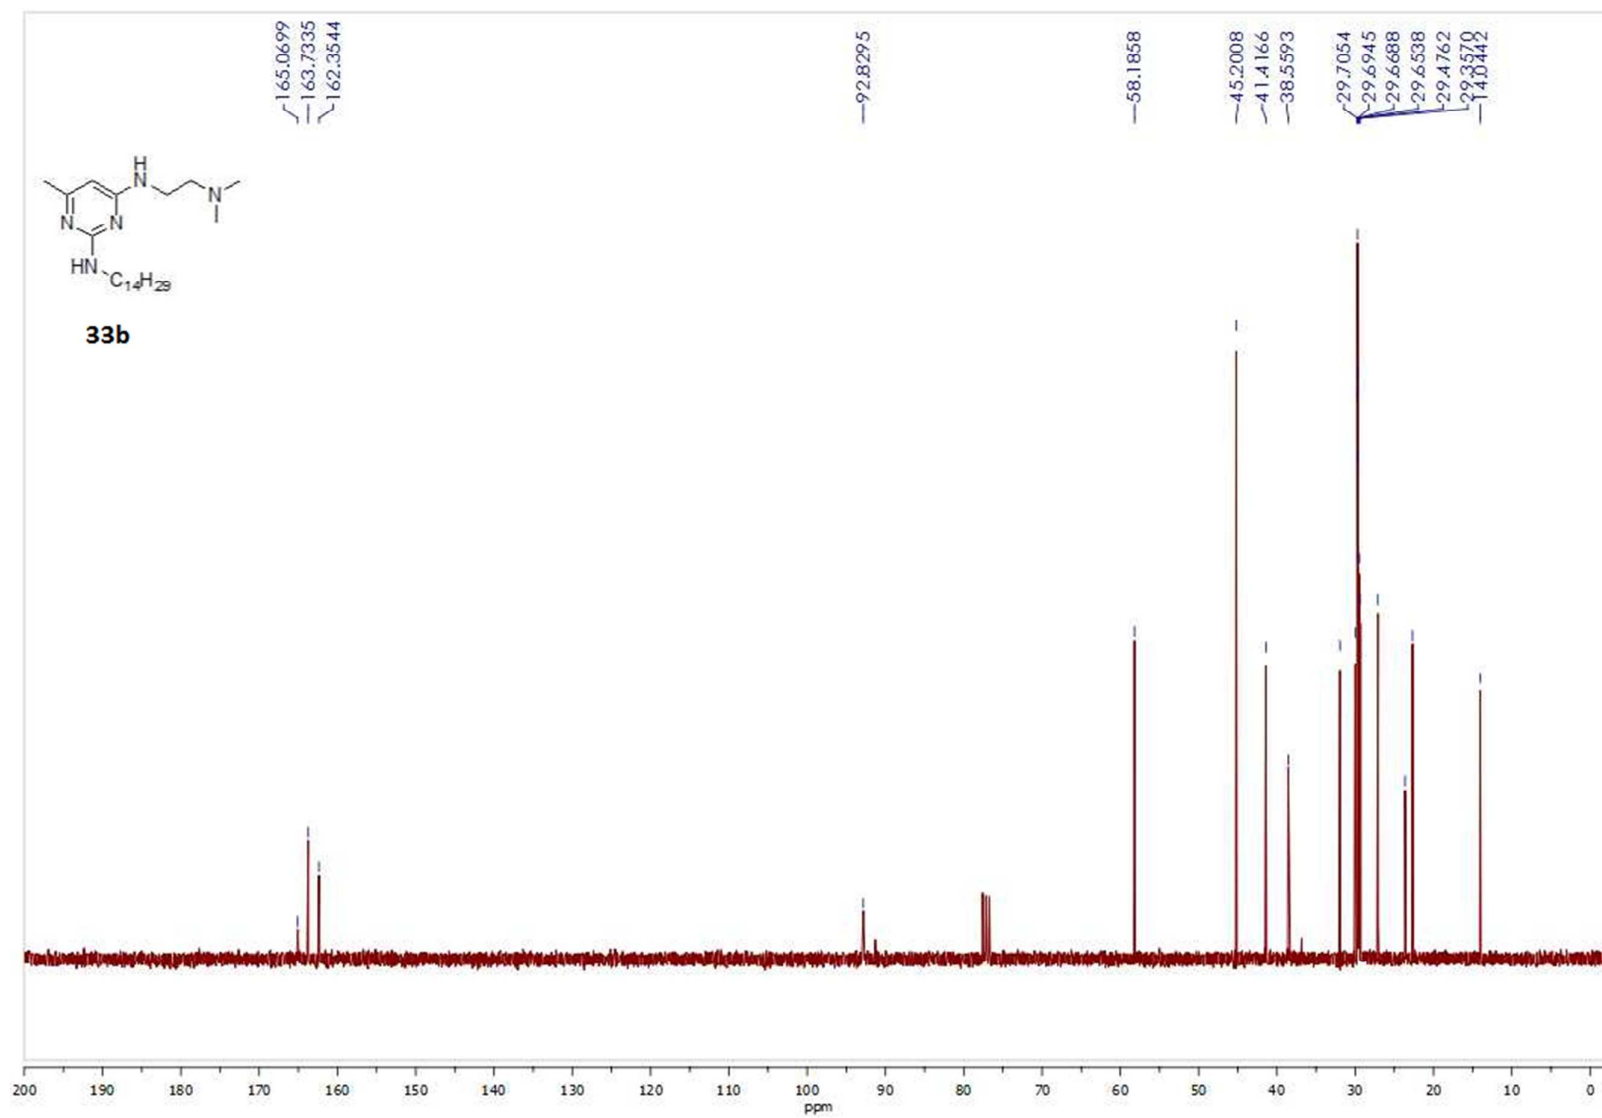

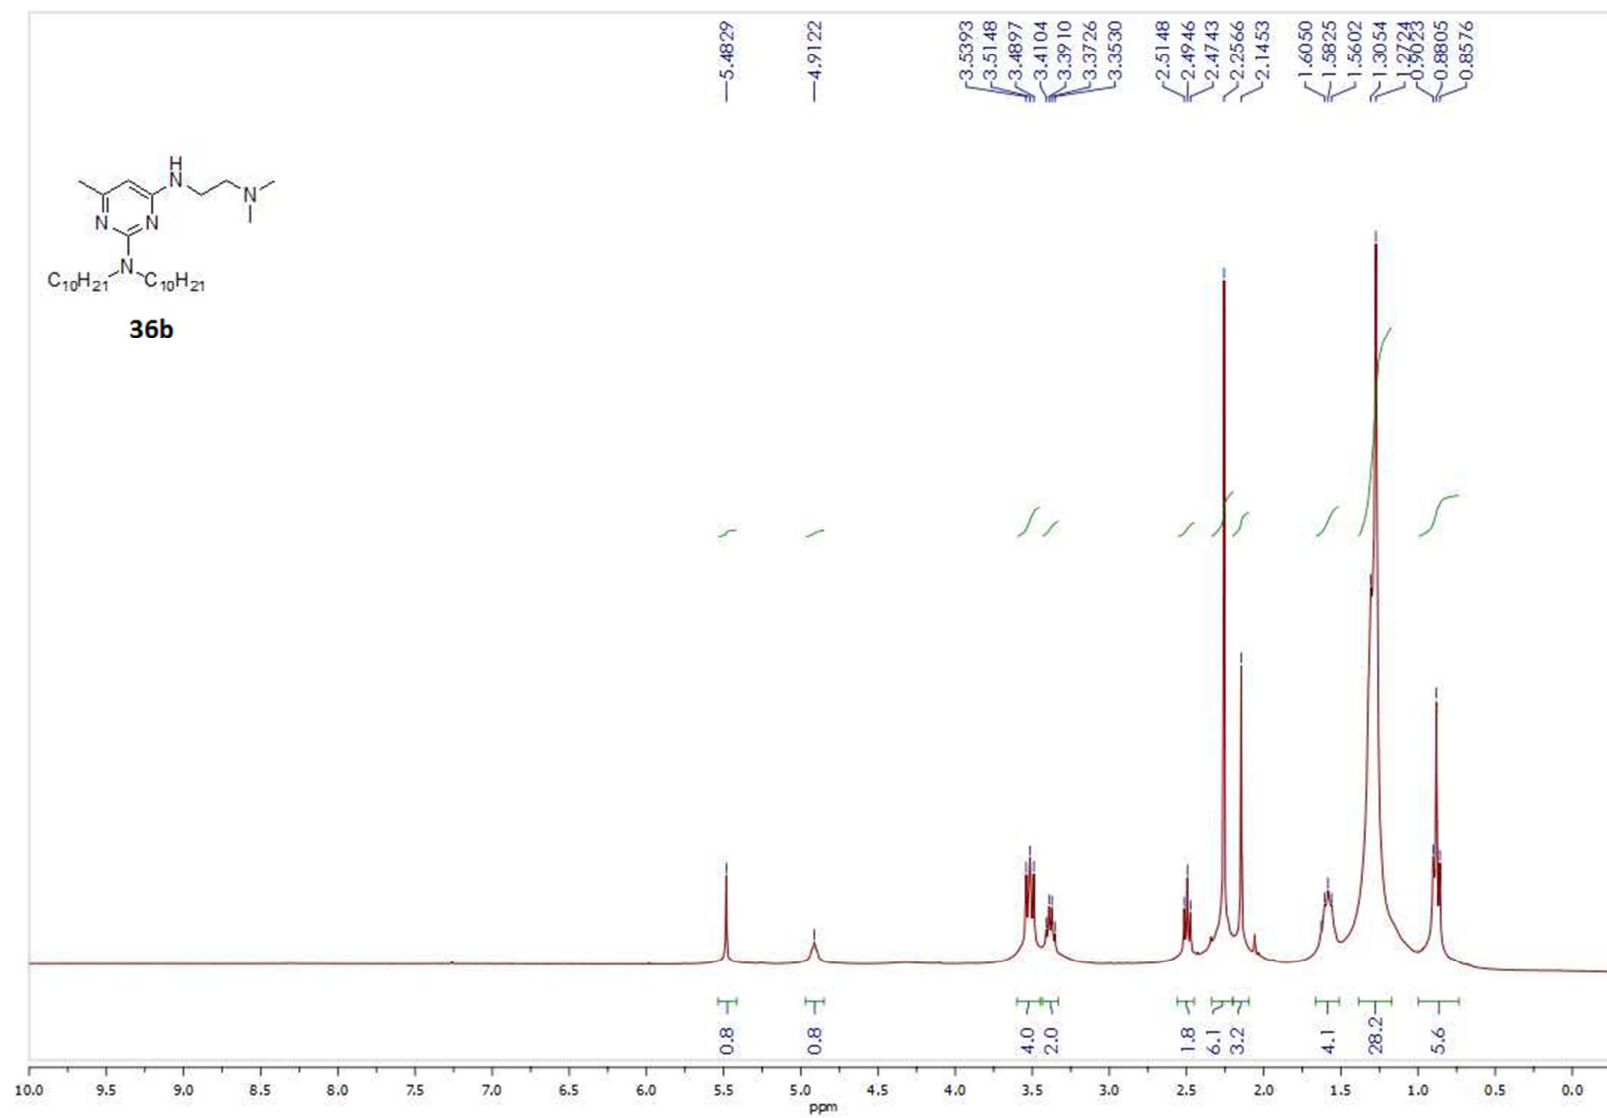

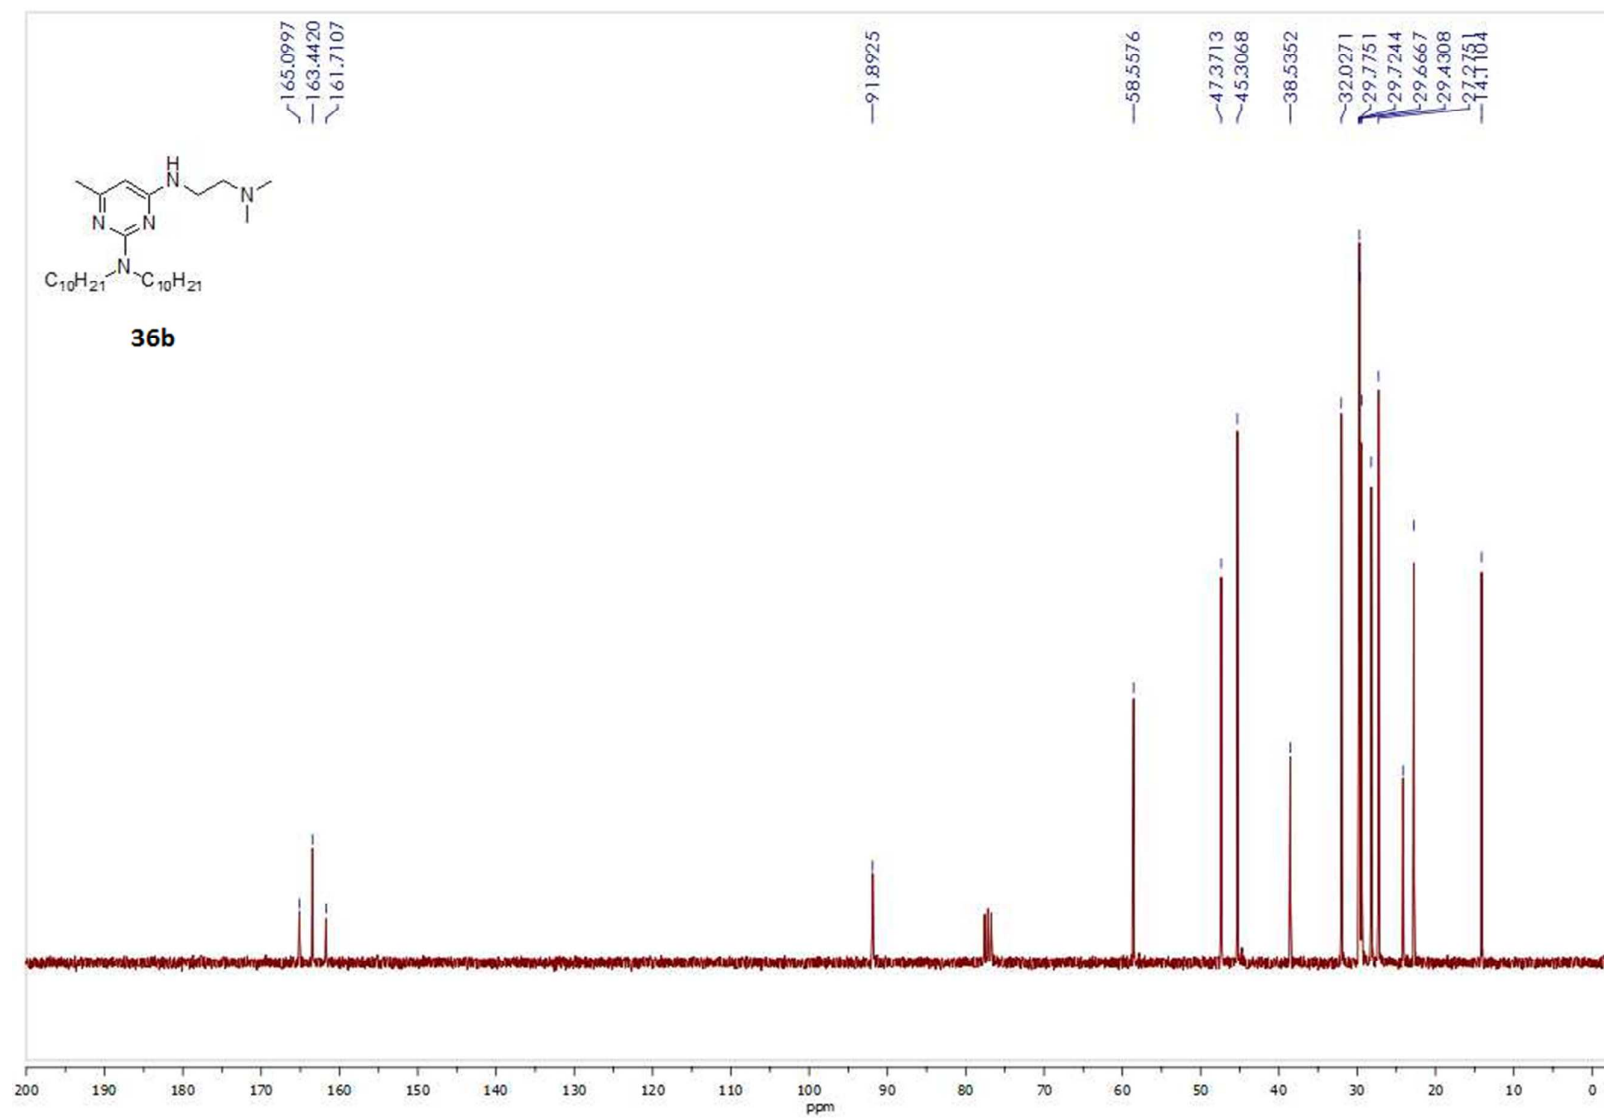

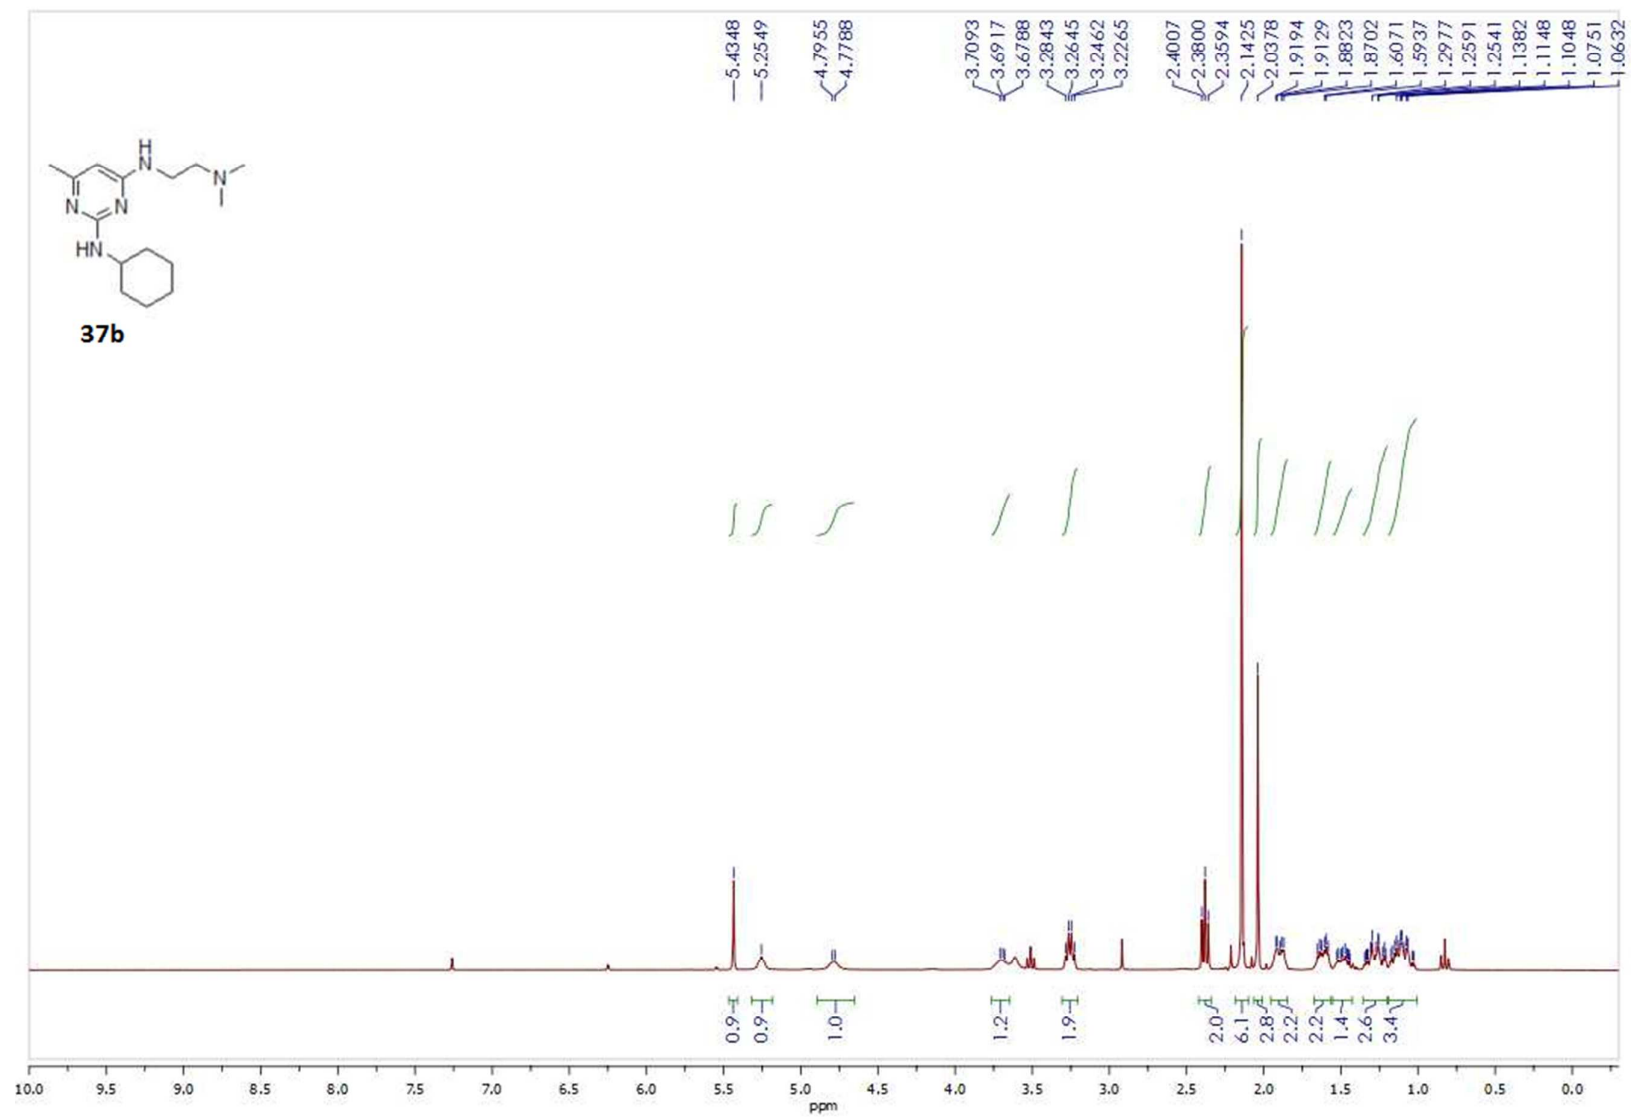

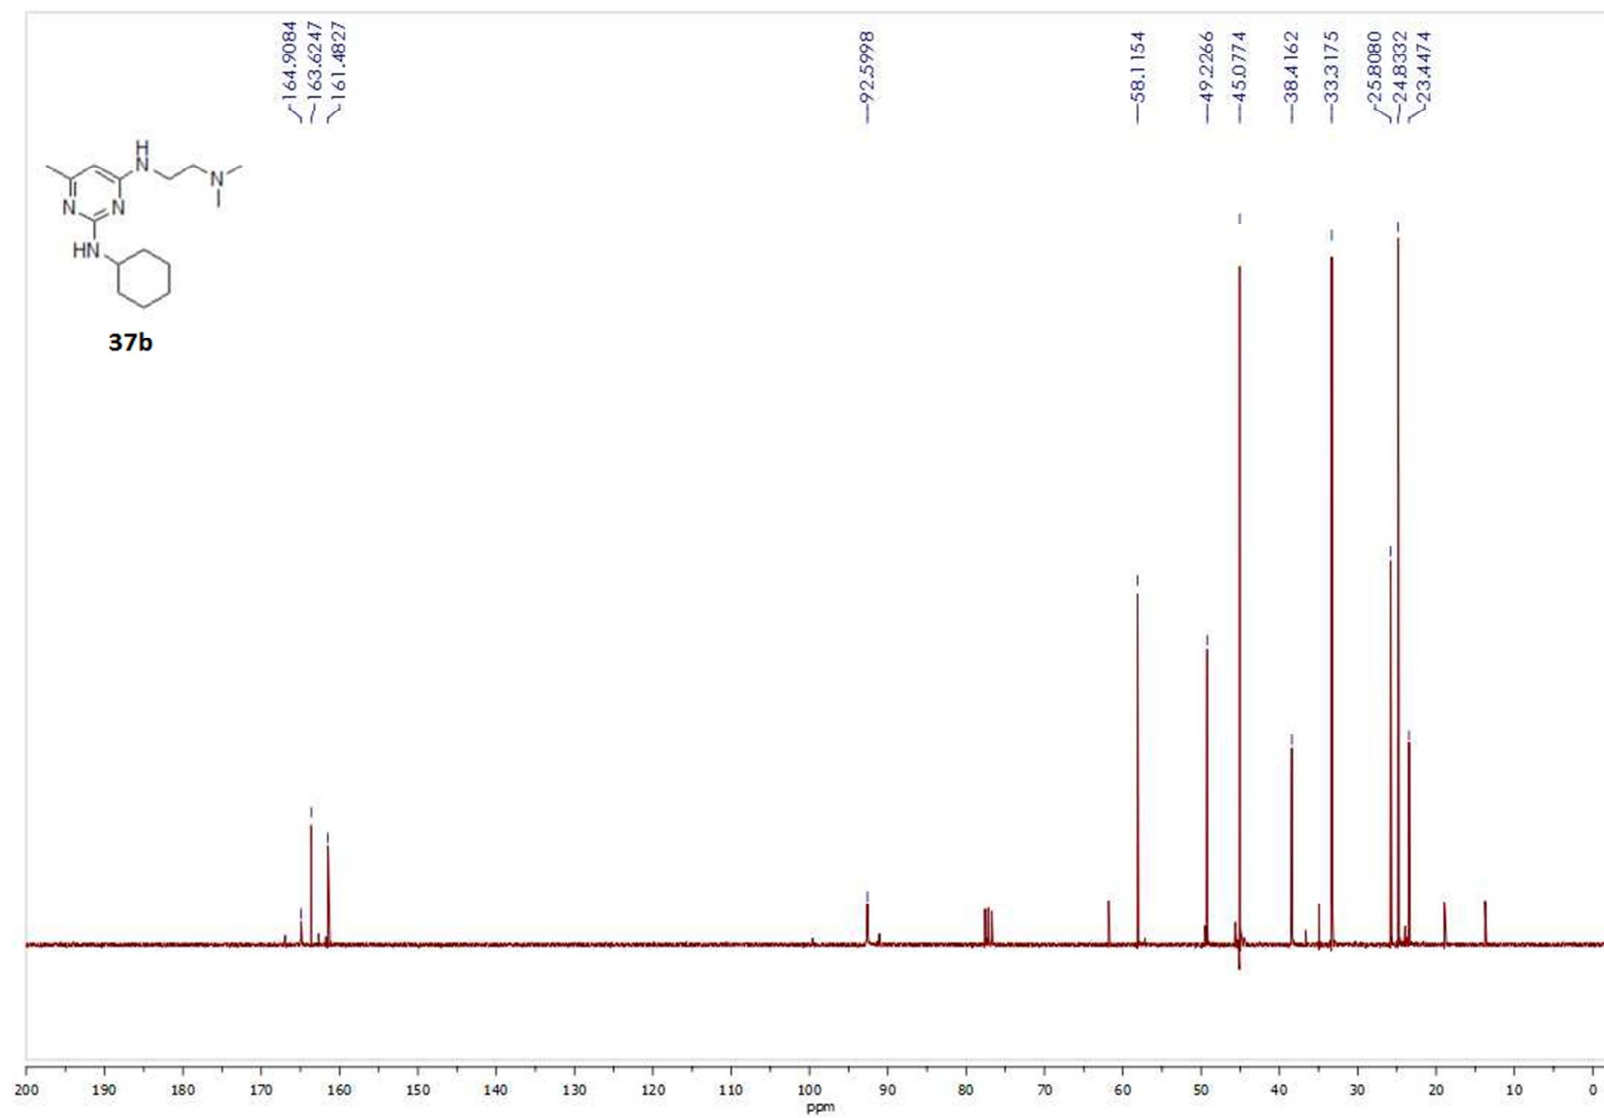

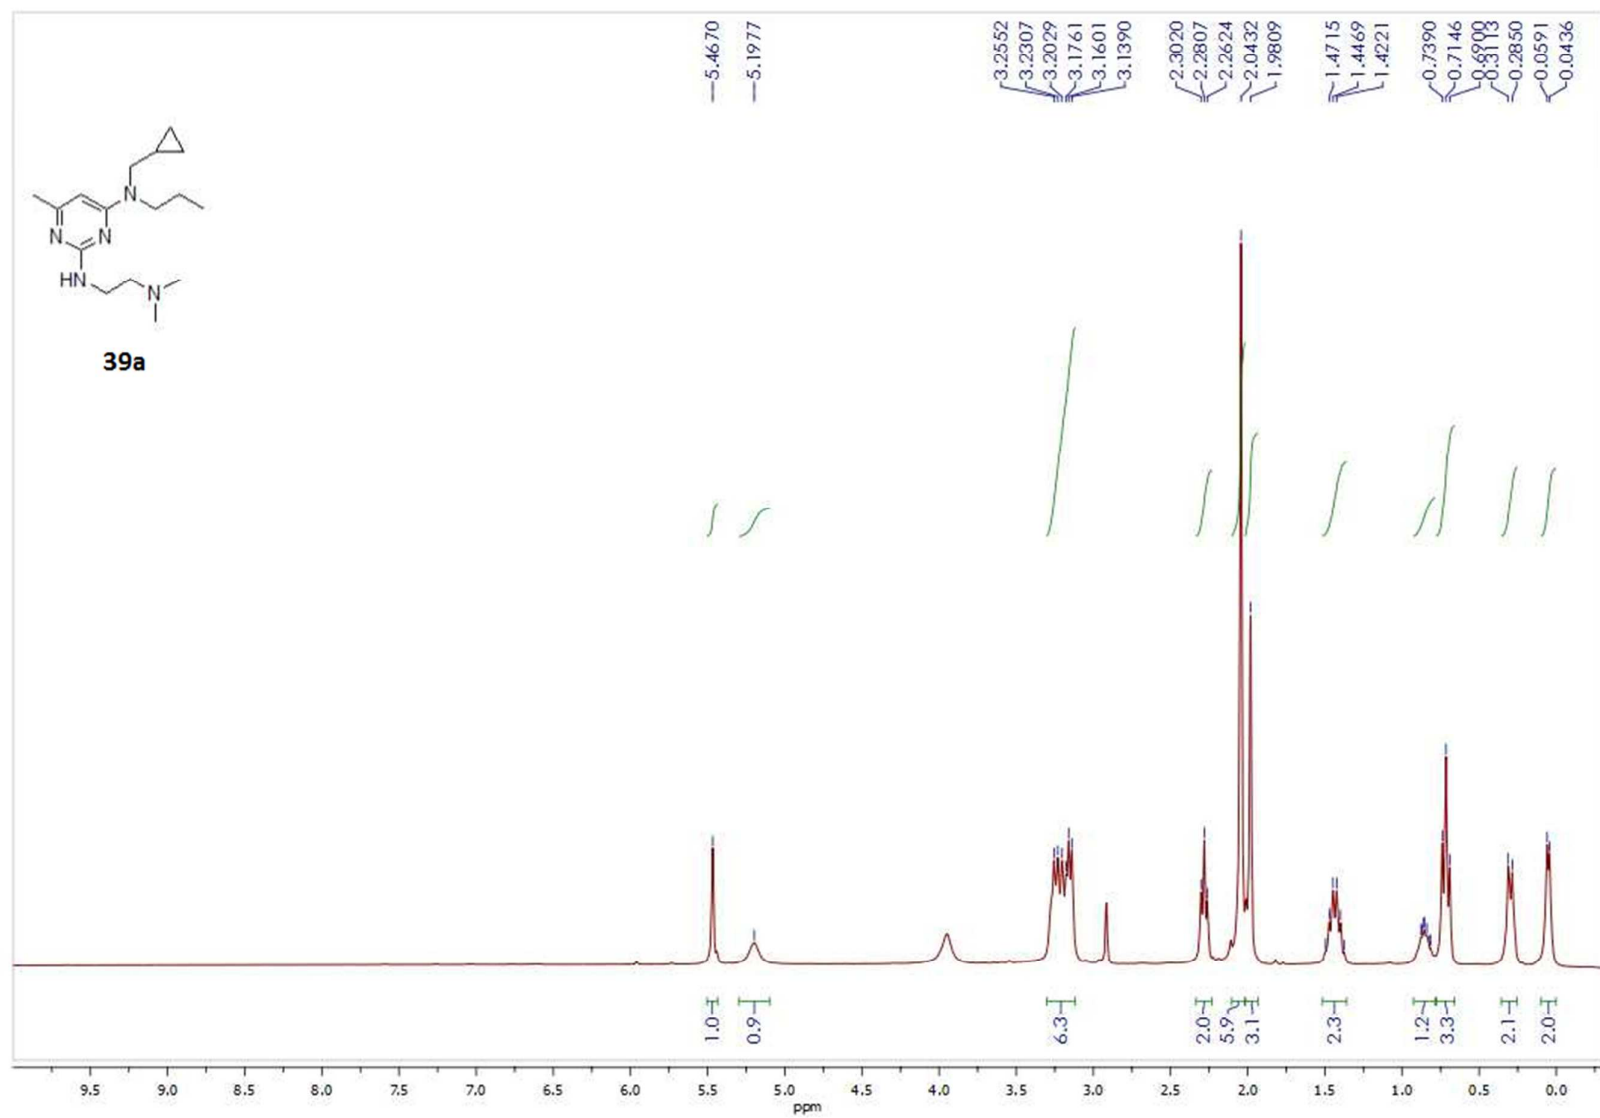

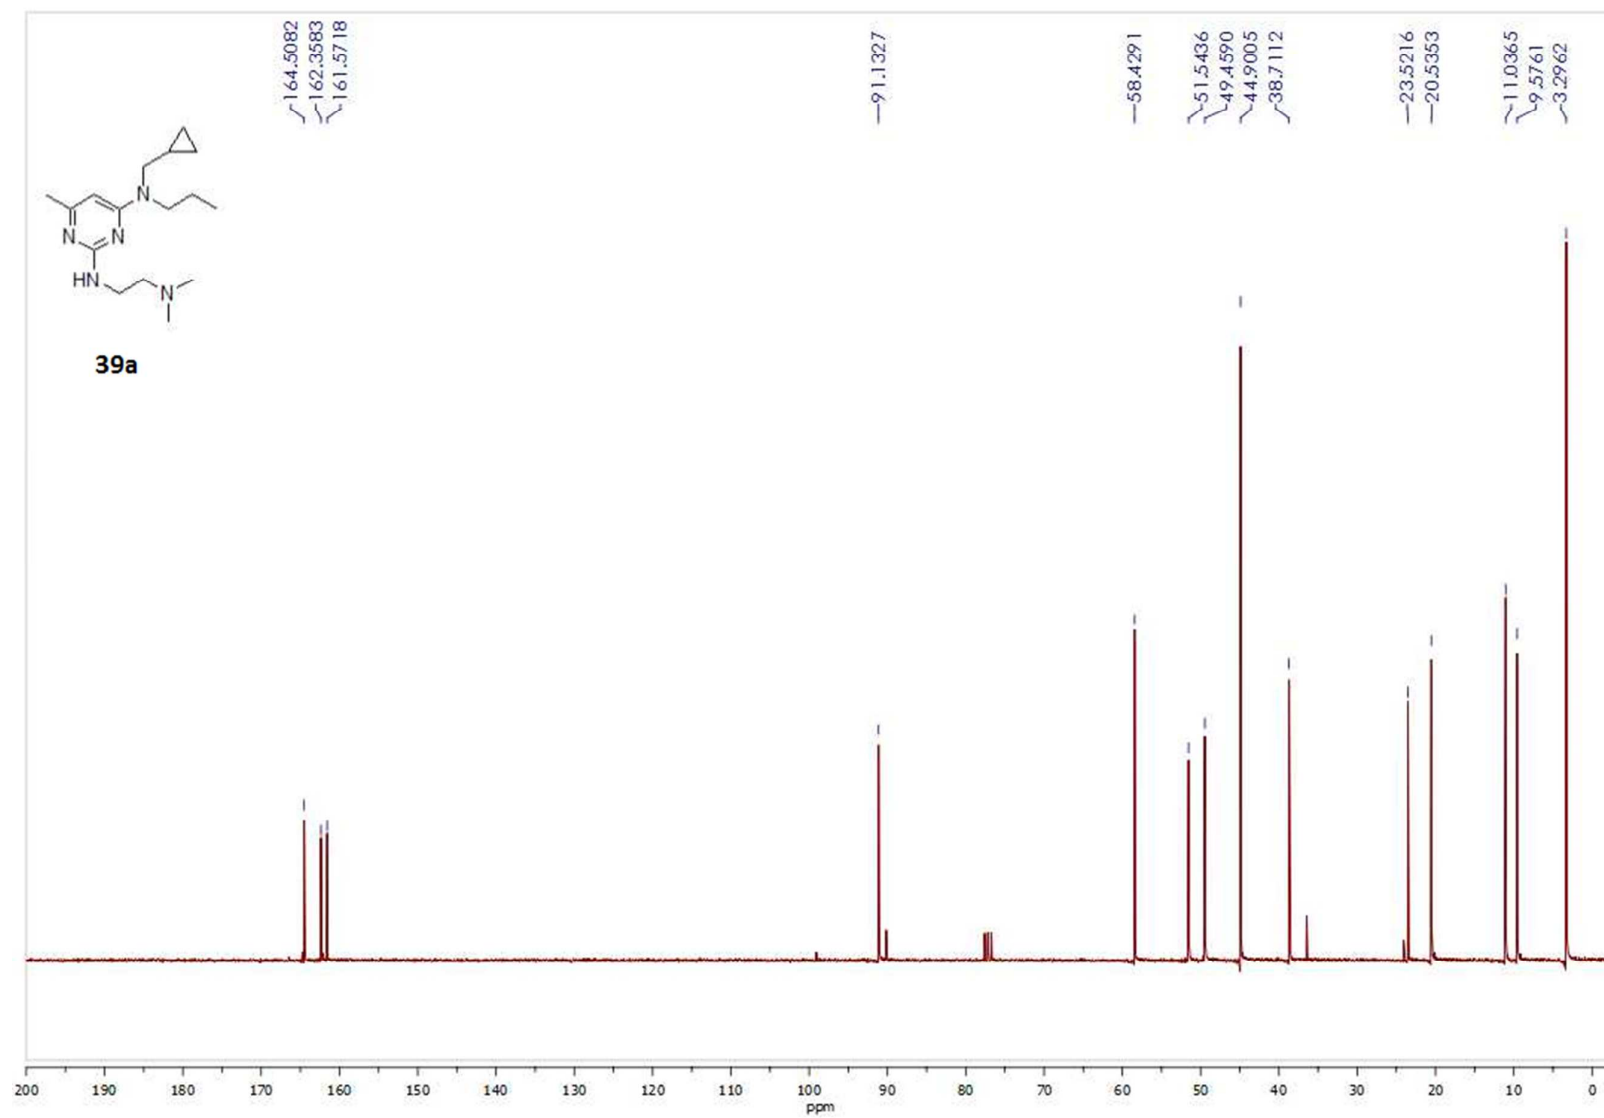



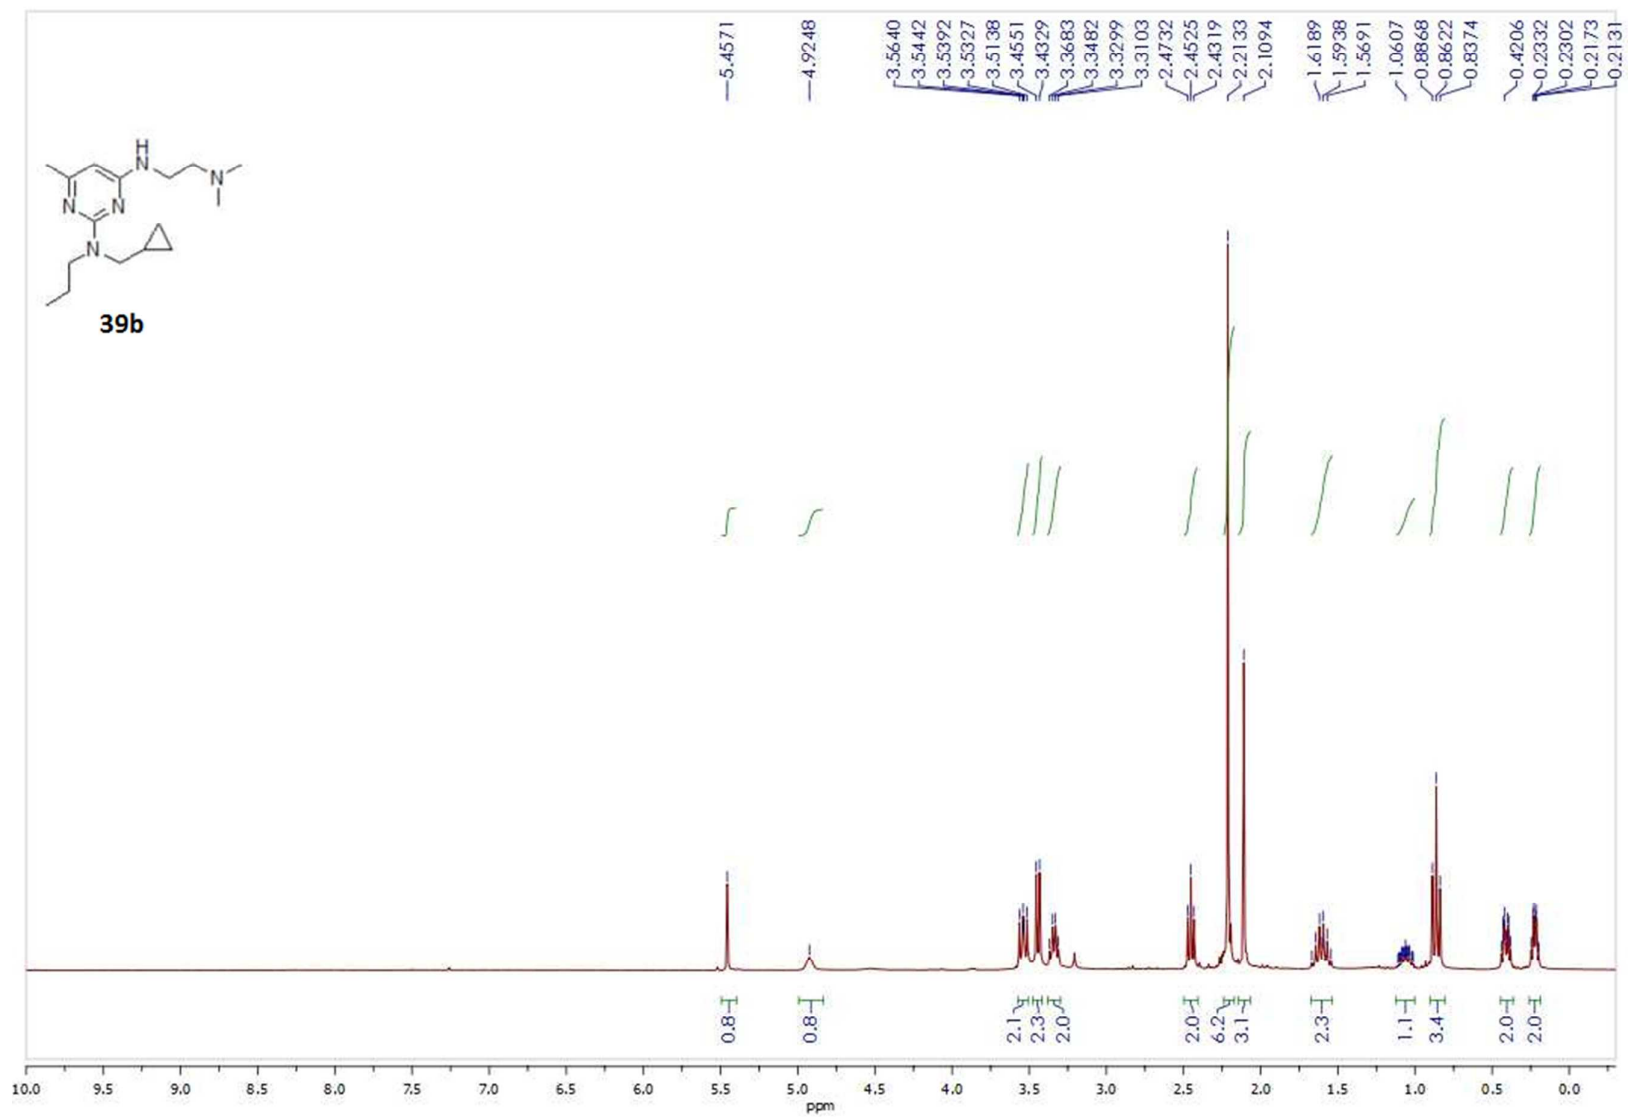

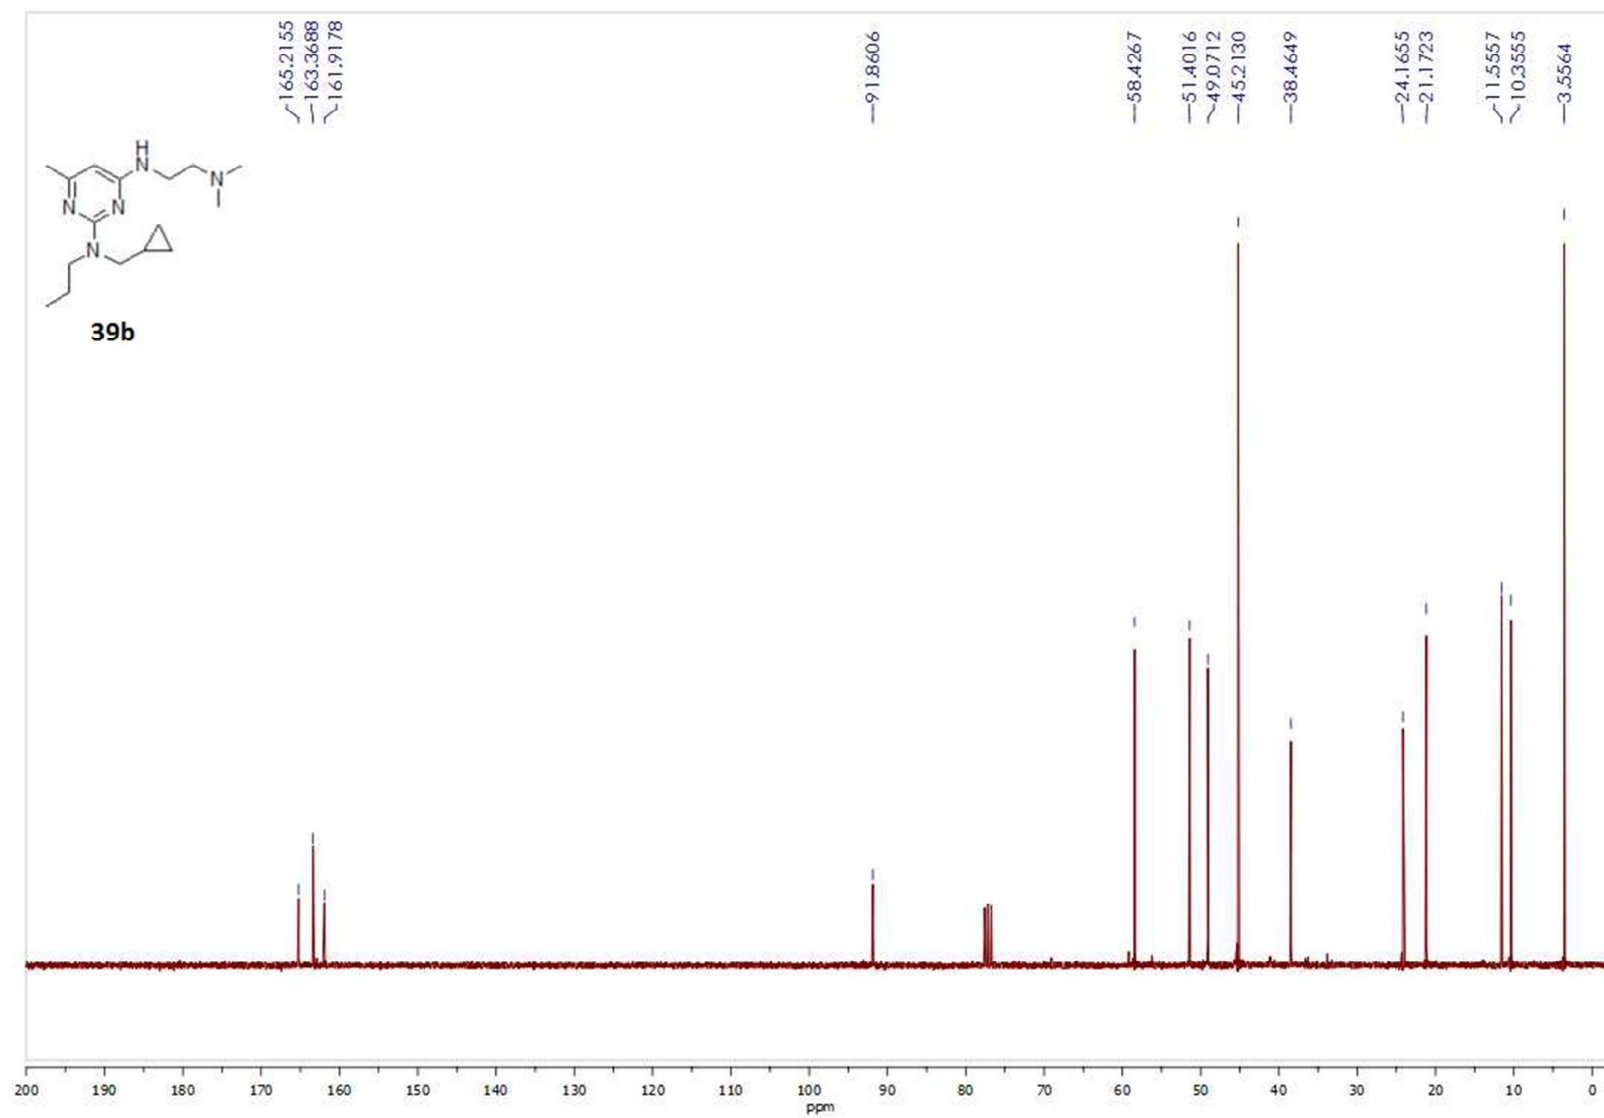

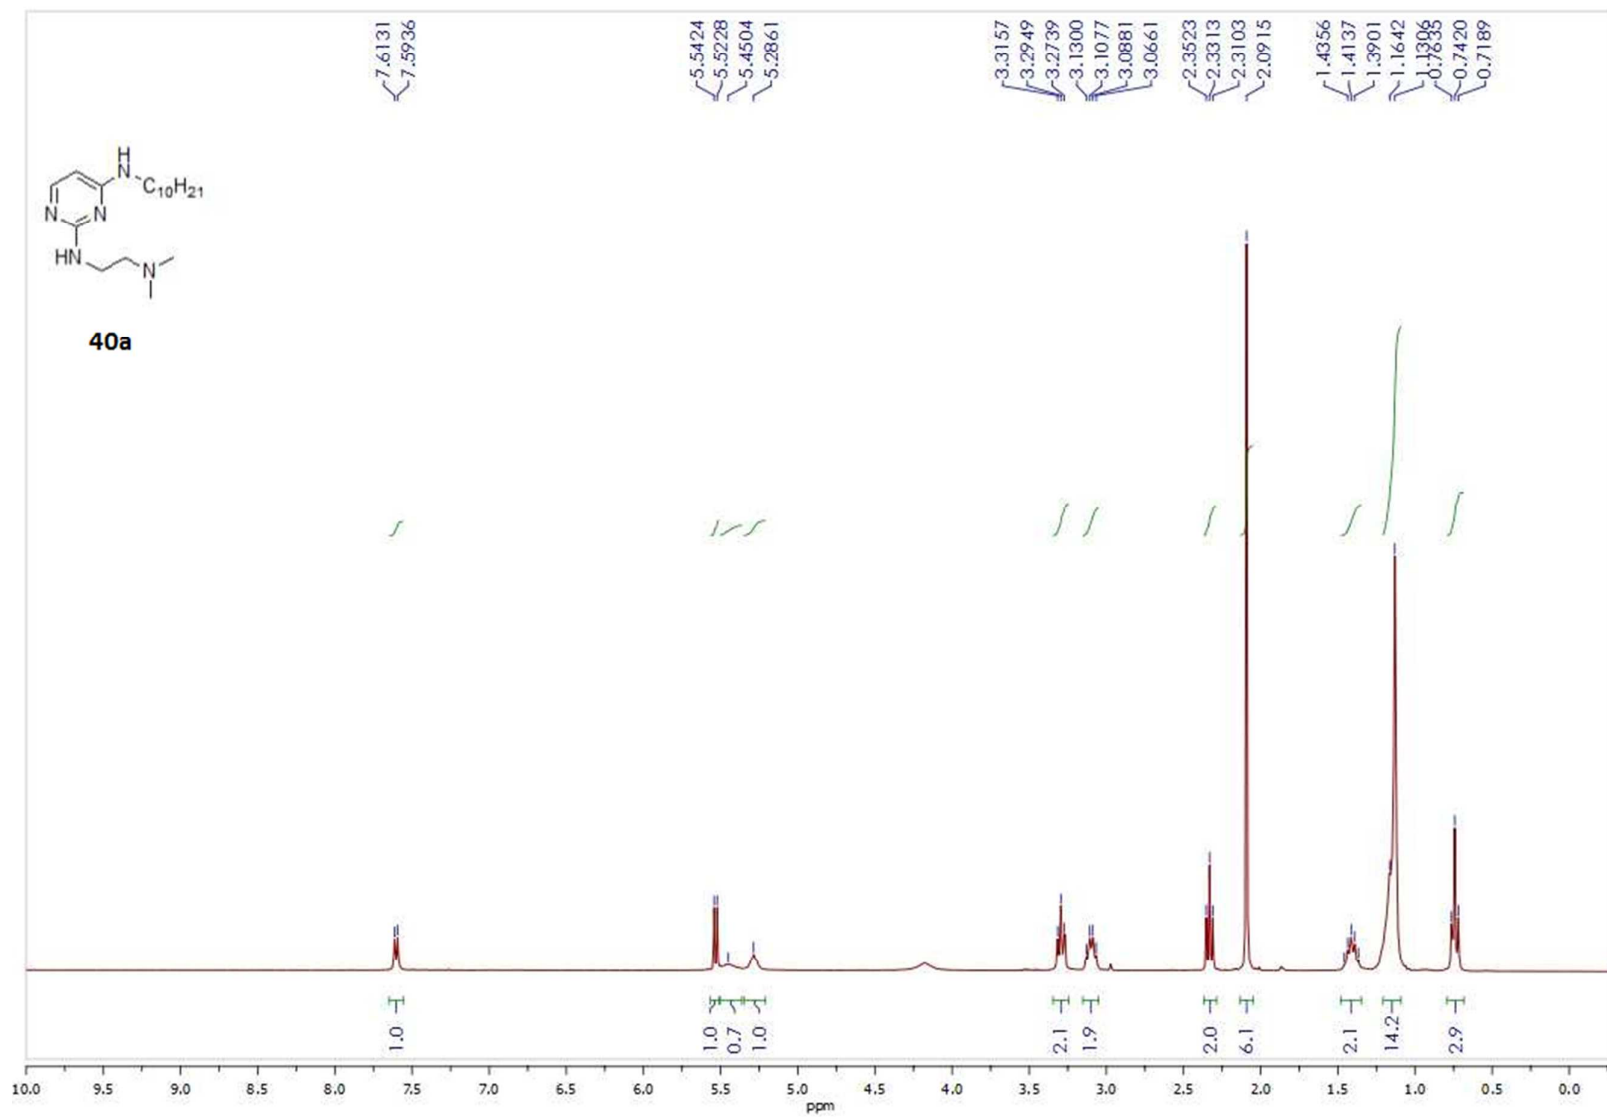

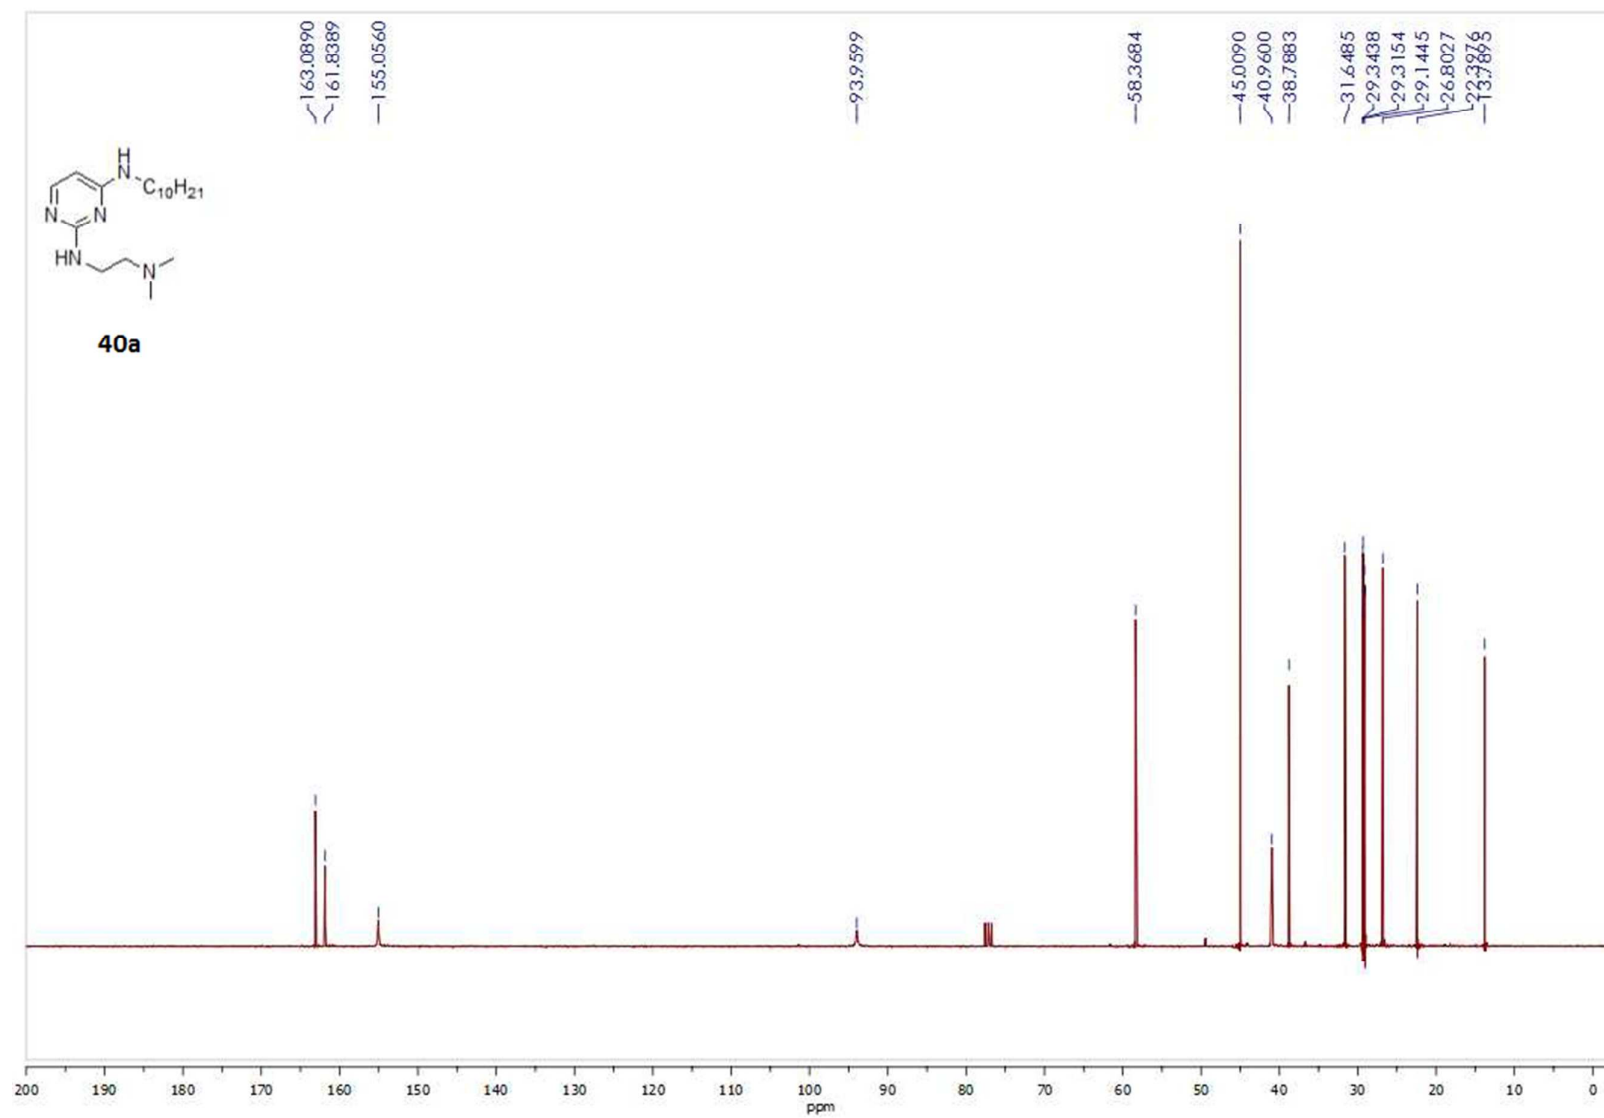

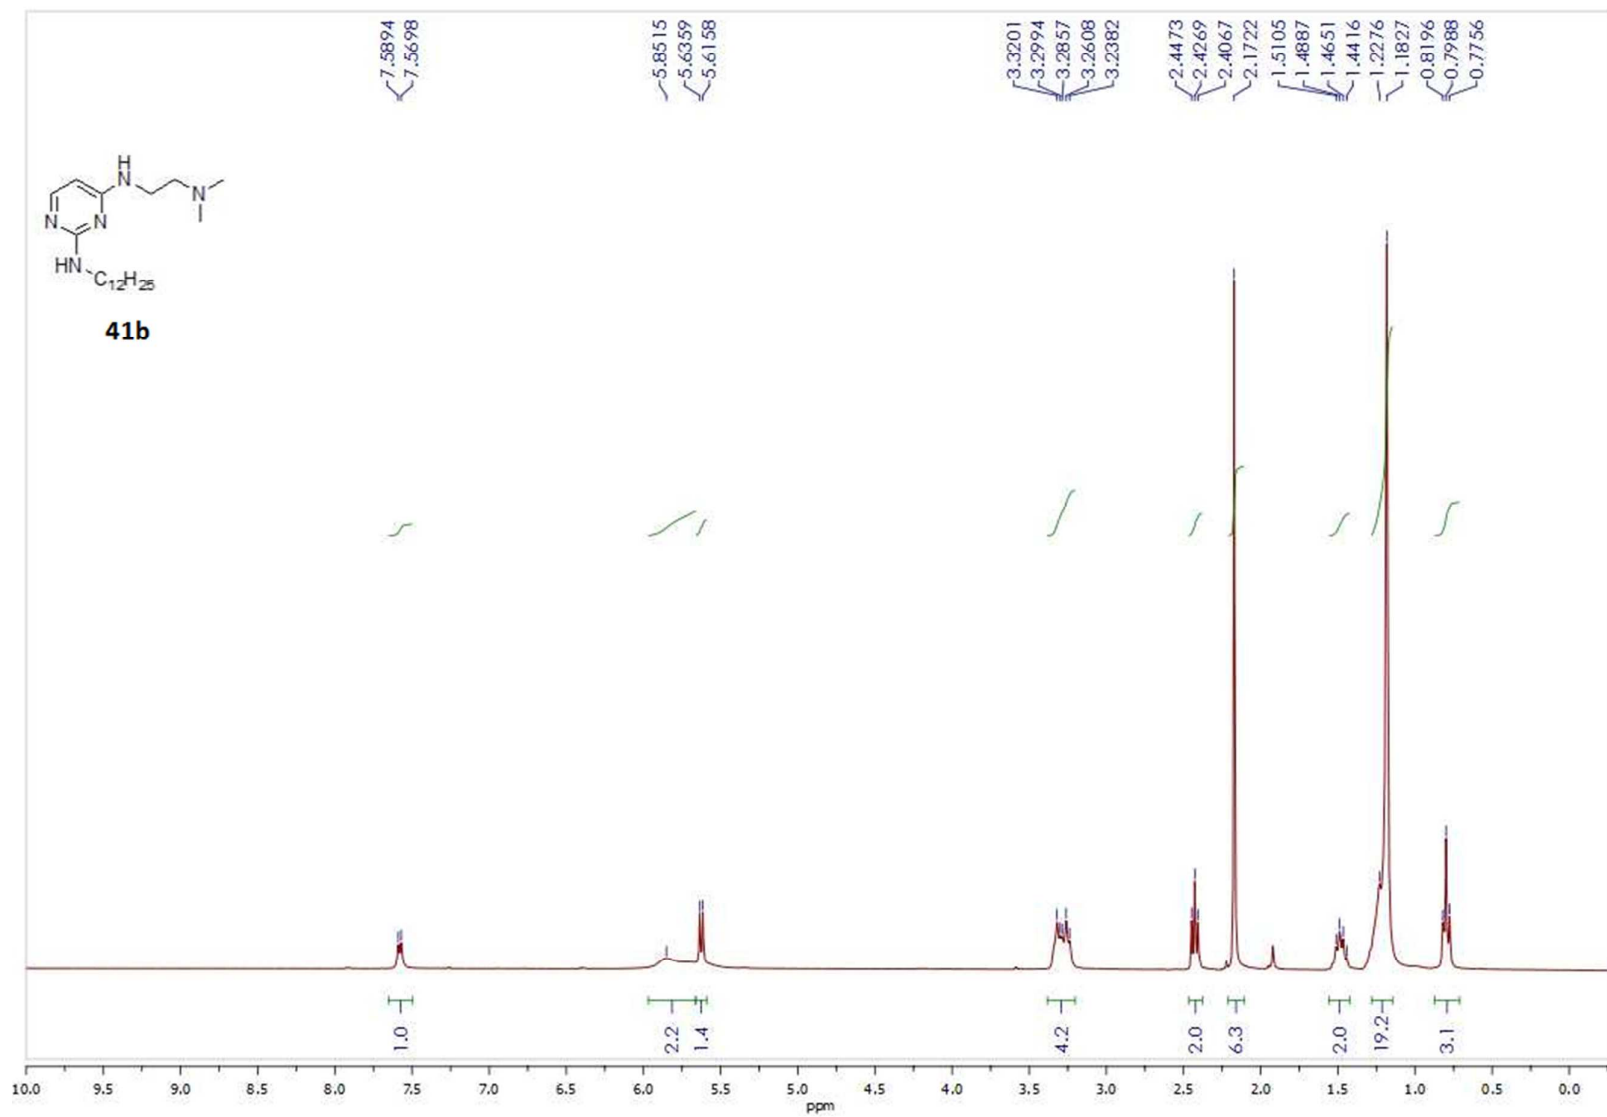

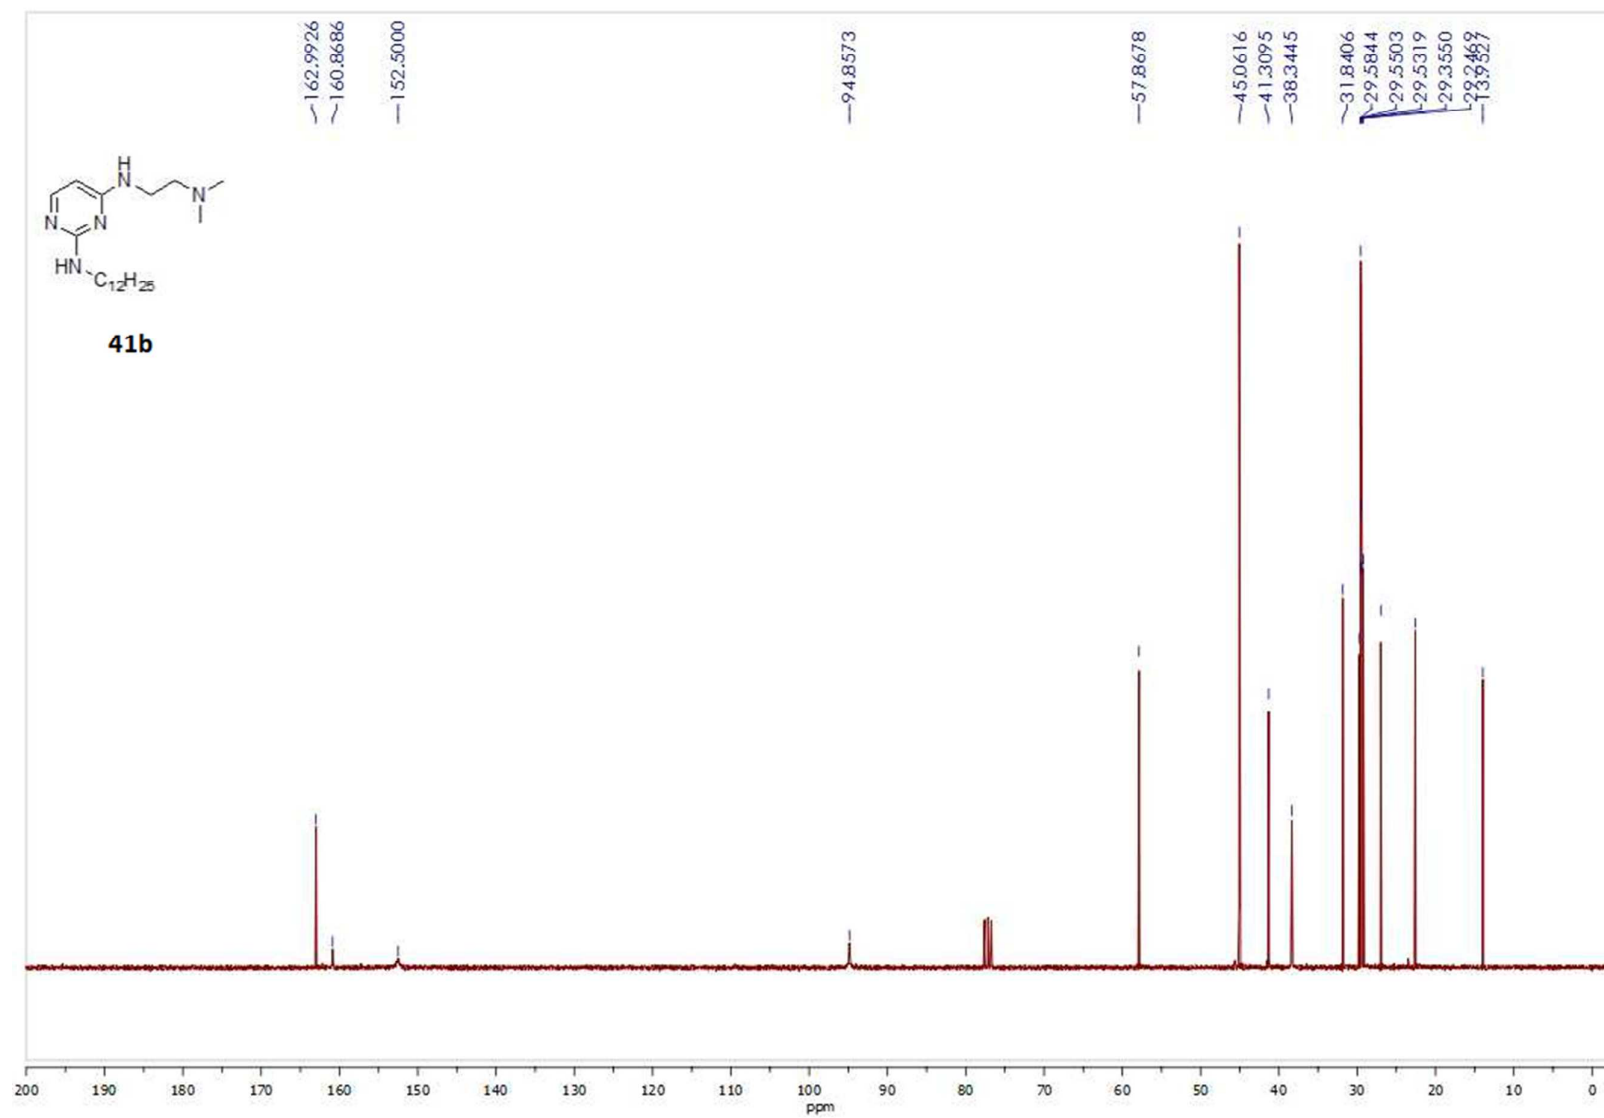

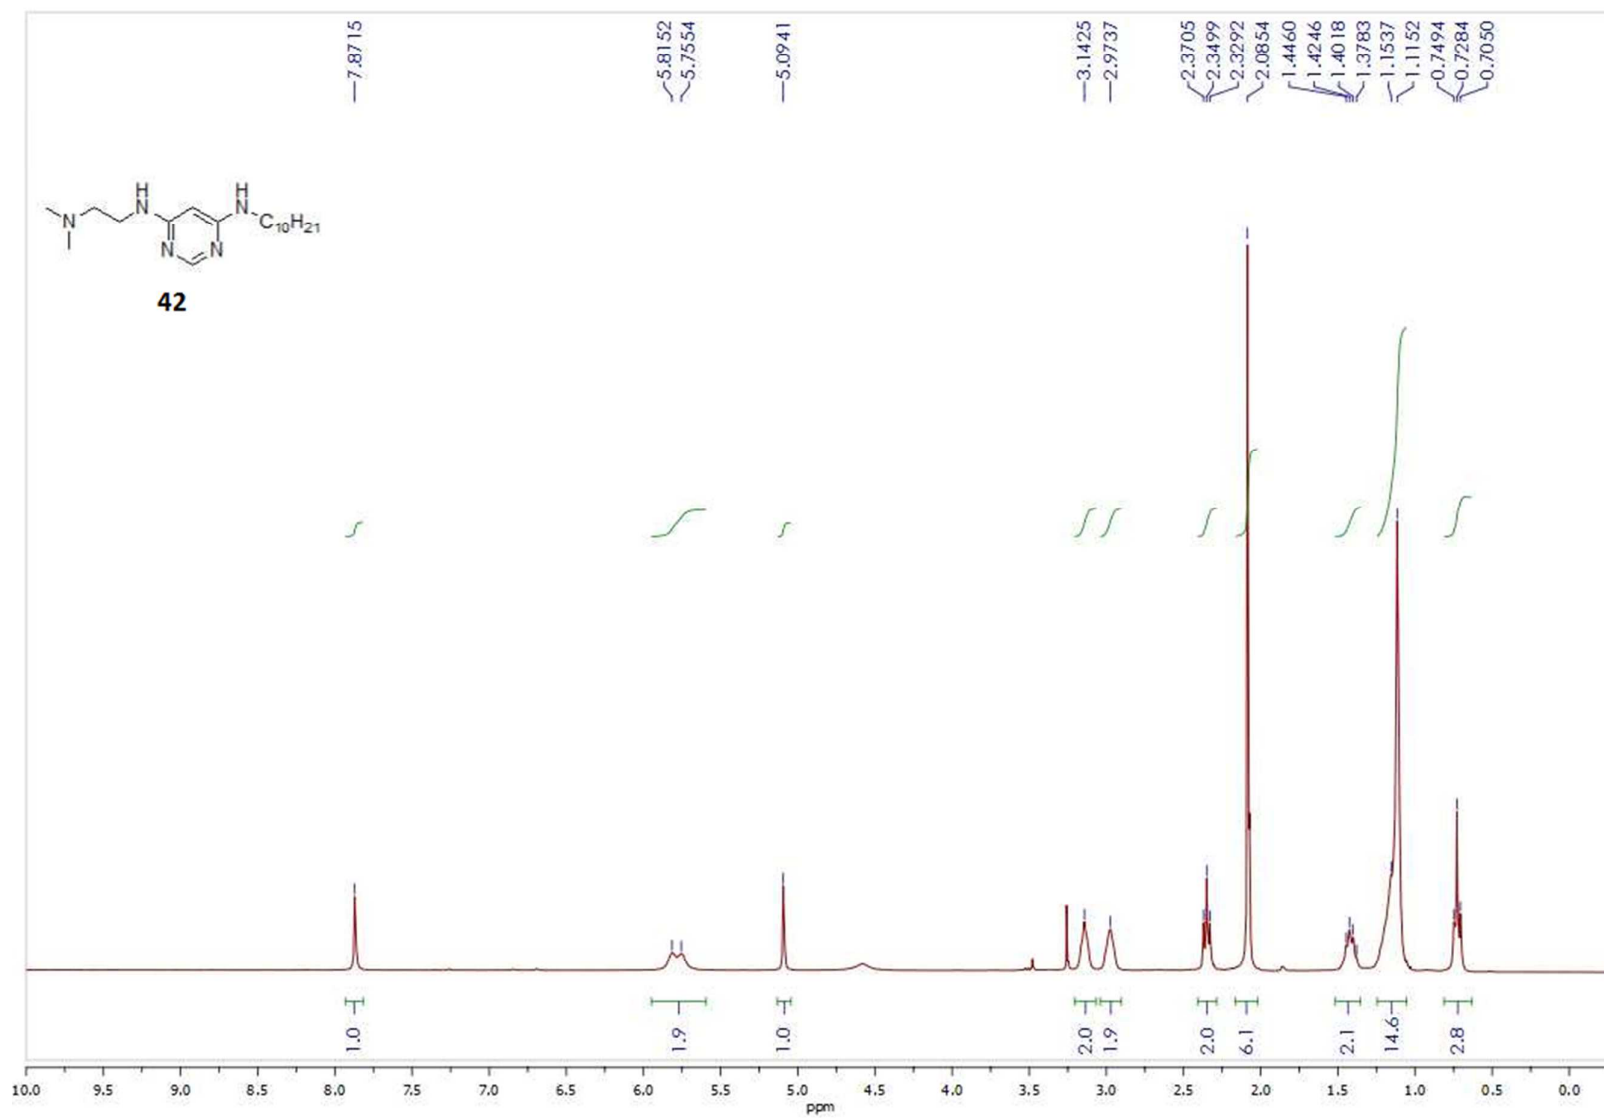

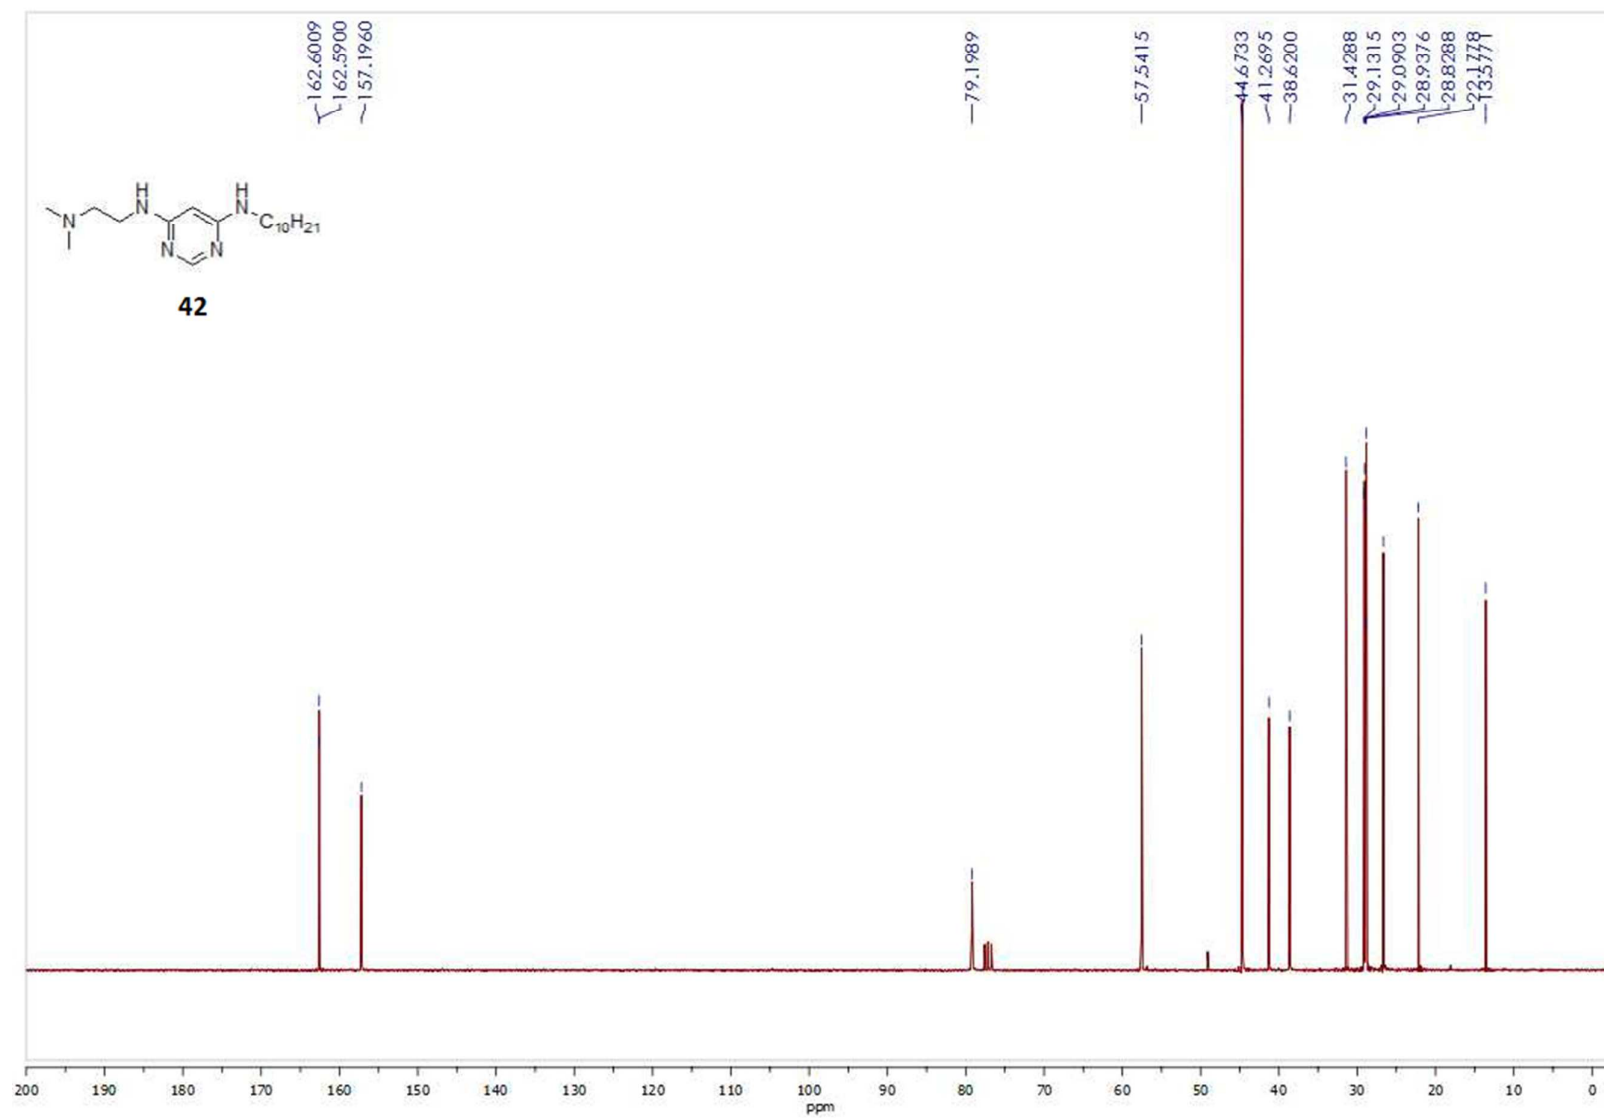

Supplement: Supplementary file 1 [file 7223837]
